# Supplementary material for: An integrated metagenomics pipeline for strain profiling reveals novel patterns of bacterial transmission and biogeography
Source: Genome Res. 2016 Nov;26(11):1612–25. doi: 10.1101/gr.201863.115 (PMC5088602; doi:10.1101/gr.201863.115)
Supplement: Supplemental Material [file supp_gr.201863.115_Supplemental_Tables.xlsx]

## Sheet: Table S1
Supplemental table S1. Comparison of MIDAS to existing methods
Method	Number of reference species	Supports User-Defined Reference data	Species Relative Abundance	Strain Relative Abundance	Pangenome Profiling	SNP detection	Phylogenetic Reconstruction	Population genetic inferences	Functional Annotations for Genes/SNPs	Reference
MIDAS	5952	Yes	Yes	No	Yes	Yes	Dominant strain only	Yes	Yes	Current manuscript
PanPhlAn	459	Yes	No	No	Yes	No	No	No	No	Scholz et al. (2016) Nature Methods
BinStrain	n/a*	Yes	No	Yes	No	Yes	Yes	No	No	Joseph et al. (2015) bioArxiv
ConStrains	1221	No	Yes	Yes	No	Only at marker genes	Yes	No	No	Luo et al. (2015) Nature Biotechnology
Pathoscope	n/a*	Yes	Yes	Yes	No	No	No	No	n/a	Francis et al. (2013) Genome Research
Sigma	n/a*	Yes	Yes	Yes	No	No	No	No	n/a	Ahn et al. (2014) Bioinformatics
WG-FAST	n/a*	Yes	No	No	No	Yes	Dominant strain only	No	No	Sahl et al. (2015) Genome Medicine
*requires user-supplied reference data
Field definitions
Number of reference species: number of species that can be profiled at strain level; PanPhlaAn provides 459 species, but additionally allows the user to supply their own reference data
Supports user-defined reference data: does the software enable a user to supply their own reference data?
Species relative abundance: software estimates species relative abundance; for MIDAS and ConStrains, these estimates are used to automatically select species for strain-level inferences
Strain relative abundance: software estimates relative abundances of strains; Sigma and Pathoscope use reference strains; ConStrains performs de novo strain identification
Pangenome profiling: software estimate the presence/absence of pangenome genes in bacterial species from a metagenome; MIDAS additionally provides functional annotations (SEED, KEGG, GO, EC) for these genes
SNP detection: software identifies single-nucleotide variants. MIDAS additionally estimates the frequencies of SNPs and functionally annotates variants; MIDAS also identifies the core-genome of a species directly from metagenomic samples
Phylogenetic reconstruction: software builds phylogenetic tree of strains based on SNPs; MIDAS and WG-FAST use consensus sequences and build phylogeny for the dominant strain of each species in a sample
Population genetic inferences: MIDAS can use SNPs to estimate various population genetic inferences, including Pi (nucleotide diversity)
Functional Annotations for Genes/SNPs: annotations are provided for pangenome genes and SNPs. Only applicable for tools that perform pangenome profiling or SNP detection

## Sheet: Table S2
Supplemental table S2. Clustering performance (F1-score) for 112 PhyEco markers at different % identity thresholds % Identity cutoff: used to cut dendrogram of genomes and identify connected components (i.e. genome-clusters) F1-scores based on comparison to gold-standard ANI for ~18,000 genome-pairs Conservation was measured by taking the ratio of percent identity between a marker-gene and the ge…
		Percent Identity Cutoffs
PhyEco Marker	Description	99	98	97	96	95	94	93	92	91	90	Max F1 Score	Conservation	Selected
B000001	ribosomal protein S2	0.868043	0.869819	0.836838	0.811954	0.787356	0.755012	0.748194	0.740377	0.738243	0.73762	0.869819	1.01905	No
B000002	ribosomal protein S10	0.833319	0.791814	0.767282	0.749625	0.734194	0.729876	0.729305	0.729335	0.728293	0.728267	0.833319	1.02236	No
B000003	ribosomal protein L1	0.882844	0.88739	0.860025	0.823017	0.794813	0.770344	0.761003	0.753642	0.743337	0.737764	0.88739	1.0174	No
B000004	translation elongation factor EF-2	0.8121	0.907673	0.928847	0.922921	0.901769	0.870807	0.82875	0.797358	0.779929	0.761116	0.928847	1.01083	Yes
B000005	translation initiation factor IF-2	0.823911	0.913598	0.92307	0.907823	0.878301	0.843483	0.809842	0.781479	0.764913	0.748828	0.92307	1.01241	No
B000006	metalloendopeptidase	0.795496	0.874092	0.928164	0.938102	0.931275	0.913633	0.886439	0.85815	0.836693	0.803816	0.938102	1.00804	Yes
B000007	ribosomal protein L22	0.835034	0.804887	0.77311	0.760272	0.753376	0.746865	0.740228	0.739222	0.738752	0.738541	0.835034	1.02152	No
B000008	ffh signal recognition particle protein	0.814609	0.926346	0.939193	0.916229	0.883685	0.84101	0.81563	0.783934	0.759454	0.743983	0.939193	1.01262	Yes
B000009	ribosomal protein L4/L1e	0.864142	0.846001	0.816578	0.79507	0.778258	0.762143	0.754592	0.747407	0.737485	0.736021	0.864142	1.01856	No
B000010	ribosomal protein L2	0.873073	0.863291	0.816294	0.795047	0.76828	0.75571	0.751567	0.74662	0.743367	0.734851	0.873073	1.01877	No
B000011	ribosomal protein S9	0.856464	0.835301	0.821531	0.797969	0.776345	0.761318	0.74586	0.740026	0.739083	0.736928	0.856464	1.01859	No
B000012	ribosomal protein L3	0.857182	0.836136	0.812534	0.789721	0.770906	0.759156	0.745966	0.743298	0.742264	0.738703	0.857182	1.01923	No
B000013	phenylalanyl-tRNA synthetase beta subunit	0.763913	0.88201	0.924265	0.928625	0.912932	0.888533	0.868472	0.84455	0.825951	0.797222	0.928625	1.00755	Yes
B000014	ribosomal protein L14b/L23e	0.84137	0.801356	0.770089	0.746119	0.744449	0.738469	0.736651	0.736024	0.73412	0.734042	0.84137	1.02115	No
B000015	ribosomal protein S5	0.878697	0.845025	0.81652	0.794236	0.775006	0.760059	0.749849	0.747215	0.743701	0.742973	0.878697	1.019	No
B000016	ribosomal protein S19	0.835708	0.78862	0.7585	0.740344	0.730949	0.727232	0.72659	0.725433	0.72406	0.726684	0.835708	1.02218	No
B000017	ribosomal protein S7	0.869488	0.848229	0.805173	0.786229	0.754741	0.749274	0.745562	0.743549	0.741266	0.742415	0.869488	1.02034	No
B000018	ribosomal protein L16/L10E	0.849939	0.820783	0.786949	0.781203	0.765138	0.754896	0.75	0.748162	0.73614	0.736491	0.849939	1.02144	No
B000019	ribosomal protein S13	0.866979	0.835707	0.801042	0.779174	0.763638	0.756316	0.754511	0.750009	0.739097	0.738136	0.866979	1.0214	No
B000020	phenylalanyl-tRNA synthetase α subunit	0.831546	0.906299	0.906304	0.892346	0.863402	0.836431	0.801579	0.77752	0.763829	0.747561	0.906304	1.01271	No
B000021	ribosomal protein L15	0.86103	0.849561	0.830478	0.80345	0.787357	0.777452	0.763406	0.749405	0.741338	0.740519	0.86103	1.01825	No
B000022	ribosomal protein L25/L23	0.838893	0.819963	0.784441	0.761085	0.753294	0.748009	0.743374	0.743442	0.743069	0.738878	0.838893	1.02075	No
B000023	ribosomal protein L6	0.883953	0.88446	0.837847	0.808902	0.78534	0.766981	0.752498	0.750718	0.747854	0.74978	0.88446	1.01854	No
B000024	ribosomal protein L11	0.882785	0.852947	0.827436	0.797181	0.782434	0.762519	0.751552	0.744004	0.738525	0.738111	0.882785	1.01954	No
B000025	ribosomal protein L5	0.883212	0.845323	0.805292	0.786374	0.766979	0.758788	0.747901	0.742166	0.741057	0.740689	0.883212	1.02103	No
B000026	ribosomal protein S12/S23	0.839256	0.808849	0.776016	0.754726	0.743675	0.731828	0.73016	0.729563	0.729295	0.729108	0.839256	1.02223	No
B000027	ribosomal protein L29	0.829721	0.802548	0.775352	0.763841	0.757441	0.756221	0.751904	0.743935	0.742285	0.742088	0.829721	1.02237	No
B000028	ribosomal protein S3	0.847684	0.825169	0.804984	0.788036	0.773934	0.756817	0.746748	0.740652	0.738465	0.738153	0.847684	1.0196	No
B000029	ribosomal protein S11	0.843271	0.811964	0.781512	0.766382	0.755047	0.750599	0.741299	0.73927	0.7385	0.736954	0.843271	1.01983	No
B000030	ribosomal protein L10	0.891826	0.865546	0.833779	0.808573	0.783919	0.764363	0.755932	0.753869	0.751879	0.744676	0.891826	1.01947	No
B000031	ribosomal protein S8	0.875287	0.836232	0.803145	0.774369	0.760102	0.746734	0.744186	0.742903	0.739884	0.739574	0.875287	1.02146	No
B000032	tRNA pseudouridine synthase B	0.781383	0.882789	0.919943	0.933219	0.927328	0.915114	0.889725	0.85963	0.846678	0.829735	0.933219	1.00583	Yes
B000033	ribosomal protein L18P/L5E	0.842316	0.821003	0.800435	0.787231	0.779879	0.762185	0.75058	0.746878	0.743816	0.741137	0.842316	1.01964	No
B000034	ribosomal protein S15P/S13e	0.851028	0.828909	0.790478	0.767213	0.750314	0.741373	0.737937	0.728587	0.727565	0.726859	0.851028	1.02172	No
B000035	Porphobilinogen deaminase	0.68613	0.772005	0.805285	0.81144	0.806983	0.80387	0.785533	0.766233	0.744989	0.723102	0.81144	1.0067	No
B000036	ribosomal protein S17	0.859409	0.822859	0.801751	0.781515	0.774246	0.757367	0.751063	0.750232	0.742934	0.742278	0.859409	1.02208	No
B000037	ribosomal protein L13	0.882269	0.84677	0.807997	0.783063	0.77113	0.755466	0.74742	0.742182	0.739978	0.739667	0.882269	1.02032	No
B000038	phosphoribosylformylglycinamidine cyclo-ligase	0.755839	0.851263	0.878844	0.8781	0.842355	0.833942	0.810014	0.769293	0.751695	0.733877	0.878844	1.01075	No
B000039	ribonuclease HII	0.774365	0.874793	0.917833	0.932567	0.924231	0.913982	0.90335	0.889347	0.870088	0.857766	0.932567	1.00486	Yes
B000040	ribosomal protein L24	0.873837	0.84752	0.807045	0.782161	0.774696	0.755041	0.749982	0.74257	0.741962	0.741623	0.873837	1.02077	No
B000041	transcription elongation protein NusA	0.895232	0.946891	0.932912	0.901494	0.872226	0.833103	0.802625	0.77226	0.7605	0.75	0.946891	1.0146	Yes
B000043	GTP-binding protein EngA	0.818187	0.896095	0.941837	0.935105	0.914205	0.884953	0.864737	0.837075	0.809851	0.783457	0.941837	1.00976	Yes
B000045	priA primosome assembly protein	0.763545	0.859439	0.903167	0.921671	0.927751	0.910059	0.896319	0.871391	0.847955	0.832598	0.927751	1.00535	Yes
B000046	transcription-repair coupling factor	0.805686	0.887557	0.933767	0.932779	0.924986	0.899853	0.875641	0.836534	0.816643	0.795529	0.933767	1.00813	Yes
B000047	CTP synthase	0.757175	0.828265	0.858453	0.849319	0.825299	0.785053	0.753803	0.726786	0.702413	0.699042	0.858453	1.0135	No
B000048	secY preprotein translocase subunit SecY	0.898847	0.908513	0.871985	0.841121	0.823433	0.807716	0.779205	0.769515	0.763892	0.759364	0.908513	1.0156	No
B000049	GTP-binding protein Obg/CgtA	0.833889	0.919719	0.941394	0.938531	0.92307	0.893263	0.861616	0.836745	0.816157	0.795819	0.941394	1.01062	Yes
B000050	DNA polymerase I	0.78571	0.882232	0.923463	0.932025	0.924029	0.912687	0.885327	0.863491	0.837902	0.821467	0.932025	1.00712	Yes
B000051	rpsF 30S ribosomal protein S6	0.879326	0.840544	0.80598	0.779828	0.766007	0.751902	0.747007	0.745253	0.742674	0.740275	0.879326	1.02127	No
B000052	poA DNA-directed RNA polymerase subunit alpha	0.777509	0.761252	0.75199	0.727962	0.706797	0.703722	0.692325	0.68456	0.68588	0.686358	0.777509	1.02218	No
B000053	peptide chain release factor 1	0.733784	0.819867	0.841468	0.842121	0.836507	0.813655	0.796483	0.770741	0.744039	0.733781	0.842121	1.01224	No
B000054	rplI 50S ribosomal protein L9	0.871495	0.899503	0.872785	0.848201	0.821871	0.799493	0.779261	0.760035	0.752891	0.74825	0.899503	1.01585	No
B000055	polyribonucleotide nucleotidyltransferase	0.845496	0.920182	0.926506	0.909944	0.87219	0.839005	0.80615	0.772642	0.75589	0.741114	0.926506	1.0119	Yes
B000056	tsf elongation factor Ts	0.889616	0.908564	0.887948	0.865271	0.842076	0.813869	0.781488	0.768234	0.75039	0.742607	0.908564	1.01647	No
B000057	rplQ 50S ribosomal protein L17	0.821291	0.814229	0.798519	0.782826	0.777223	0.765804	0.75596	0.747426	0.74013	0.734568	0.821291	1.01931	No
B000058	tRNA (guanine-N(1)-)-methyltransferase	0.837069	0.896055	0.89888	0.880157	0.861444	0.835404	0.818178	0.807924	0.795397	0.78678	0.89888	1.01083	No
B000059	rplY probable 50S ribosomal protein L25	0.783874	0.825296	0.813538	0.798858	0.779312	0.765219	0.741842	0.733549	0.720933	0.709821	0.825296	1.01413	No
B000060	DNA repair protein RadA	0.731499	0.819667	0.865875	0.871537	0.866081	0.858469	0.835691	0.818673	0.797249	0.776844	0.871537	1.00857	No
B000061	glucose-inhibited division protein A	0.73786	0.825173	0.856846	0.870158	0.863408	0.851562	0.818531	0.791623	0.769608	0.753269	0.870158	1.00862	No
B000062	Unknown protein	0.854798	0.905465	0.910007	0.882906	0.862876	0.833677	0.80624	0.790701	0.77028	0.764406	0.910007	1.01376	No
B000063	ribosome-binding factor A	0.853414	0.92481	0.909363	0.886904	0.865437	0.83751	0.818793	0.797017	0.784915	0.771932	0.92481	1.01483	No
B000064	DNA mismatch repair protein MutL	0.652279	0.771266	0.814093	0.828929	0.83098	0.822142	0.806634	0.787312	0.773166	0.757661	0.83098	1.00401	No
B000065	smpB SsrA-binding protein	0.84851	0.914211	0.914635	0.911983	0.892118	0.8506	0.825262	0.806654	0.793875	0.770965	0.914635	1.01364	No
B000066	N-acetylglucosaminyl transferase	0.739057	0.830601	0.868876	0.87384	0.867971	0.856146	0.838429	0.813398	0.789787	0.773072	0.87384	1.00821	No
B000067	S-adenosyl-methyltransferase MraW	0.85938	0.926405	0.951471	0.942831	0.924399	0.912514	0.882668	0.858202	0.832078	0.80933	0.951471	1.0107	Yes
B000068	UDP-N-acetylmuramoylalanine--D-glutamate ligase	0.794417	0.896138	0.930982	0.943274	0.945755	0.920951	0.896071	0.874549	0.855469	0.842139	0.945755	1.00636	Yes
B000069	rplS 50S ribosomal protein L19	0.84992	0.829041	0.81261	0.793045	0.774291	0.75234	0.745198	0.742264	0.73966	0.73953	0.84992	1.02016	No
B000070	rplT 50S ribosomal protein L20	0.836164	0.82859	0.812444	0.782949	0.756321	0.748053	0.743085	0.739645	0.737565	0.737306	0.836164	1.01982	No
B000071	ruvA holliday junction DNA helicase	0.807931	0.898281	0.92777	0.926673	0.916704	0.89164	0.871551	0.851965	0.827578	0.80349	0.92777	1.00883	Yes
B000072	ruvB Holliday junction DNA helicase B	0.744851	0.819217	0.865416	0.872767	0.863403	0.846282	0.81605	0.803482	0.774312	0.758058	0.872767	1.00915	No
B000073	serS seryl-tRNA synthetase	0.814884	0.916068	0.94007	0.925848	0.899708	0.86882	0.829994	0.806327	0.781982	0.766541	0.94007	1.01078	Yes
B000074	rplU 50S ribosomal protein L21	0.845764	0.817768	0.790128	0.774607	0.761243	0.759017	0.751694	0.748699	0.745834	0.745312	0.845764	1.02076	No
B000075	rpsR 30S ribosomal protein S18	0.841296	0.806778	0.786006	0.771543	0.760591	0.741227	0.739552	0.73882	0.737856	0.737172	0.841296	1.02331	No
B000076	DNA mismatch repair protein MutS	0.693875	0.787137	0.83989	0.851918	0.844048	0.833886	0.807411	0.783755	0.767638	0.752903	0.851918	1.0073	No
B000077	rpsT 30S ribosomal protein S20	0.877438	0.851978	0.812261	0.778235	0.767514	0.756047	0.751901	0.741328	0.738832	0.738595	0.877438	1.02247	No
B000078	DNA repair protein RecN	0.775178	0.875317	0.917234	0.923604	0.916048	0.897837	0.86995	0.85088	0.833619	0.814052	0.923604	1.00777	No
B000079	frr ribosome recycling factor	0.888495	0.940103	0.933148	0.905898	0.869833	0.84371	0.812062	0.783304	0.766108	0.756828	0.940103	1.01504	Yes
B000080	recombination protein RecR	0.841287	0.924607	0.932429	0.923995	0.910516	0.893105	0.864071	0.839716	0.814861	0.790648	0.932429	1.01081	Yes
B000081	protein of unknown function UPF0054	0.850839	0.937292	0.939757	0.927109	0.916551	0.886405	0.869031	0.833157	0.818971	0.798587	0.939757	1.0107	Yes
B000082	miaA tRNA isopentenyltransferase	0.822616	0.903684	0.928463	0.931479	0.923401	0.914391	0.875995	0.849703	0.833896	0.816547	0.931479	1.00757	Yes
B000083	GTP-binding protein YchF	0.820883	0.912199	0.928999	0.925318	0.899987	0.860641	0.826711	0.789155	0.773493	0.758521	0.928999	1.01117	Yes
B000084	chromosomal replication initiator protein DnaA	0.848004	0.926204	0.93367	0.9211	0.902731	0.887664	0.870738	0.845844	0.818676	0.800678	0.93367	1.0111	Yes
B000085	dephospho-CoA kinase	0.780907	0.889523	0.922957	0.932858	0.931728	0.916815	0.902112	0.878598	0.867923	0.859094	0.932858	1.00374	Yes
B000086	16S rRNA processing protein RimM	0.838679	0.87816	0.883091	0.870478	0.84994	0.836583	0.822997	0.806248	0.793719	0.783411	0.883091	1.01092	No
B000087	ATP-cone domain protein	0.808081	0.846424	0.852338	0.836567	0.819717	0.793731	0.781036	0.766408	0.7481	0.733464	0.852338	1.01362	No
B000088	1-deoxy-D-xylulose 5-phosphate reductoisomerase	0.644108	0.718212	0.756425	0.75517	0.744961	0.731646	0.721377	0.710178	0.69622	0.685643	0.756425	1.00809	No
B000089	2C-methyl-D-erythritol 2,4-cyclodiphosphate synthase	0.709189	0.790357	0.818528	0.818168	0.807203	0.79342	0.776951	0.76157	0.742632	0.725895	0.818528	1.00866	No
B000090	fatty acid/phospholipid synthesis protein PlsX	0.759731	0.816461	0.830416	0.824264	0.807149	0.782575	0.765772	0.745784	0.733254	0.722176	0.830416	1.01094	No
B000091	tRNA(Ile)-lysidine synthetase	0.752797	0.852952	0.894641	0.913617	0.910585	0.904757	0.893596	0.875133	0.866492	0.85828	0.913617	1.00231	No
B000092	dnaG DNA primase	0.81418	0.903442	0.91813	0.912002	0.889388	0.876981	0.853612	0.838347	0.824044	0.804699	0.91813	1.00962	No
B000093	ruvC Holliday junction resolvase	0.662224	0.74102	0.773424	0.781693	0.788054	0.781431	0.764265	0.755792	0.737072	0.714876	0.788054	1.00817	No
B000094	rpsP 30S ribosomal protein S16	0.870911	0.849484	0.822798	0.800708	0.7827	0.760447	0.751802	0.746899	0.743057	0.74201	0.870911	1.01997	No
B000095	Recombinase A recA	0.857098	0.924138	0.93419	0.920009	0.897576	0.860832	0.831857	0.796956	0.781655	0.767056	0.93419	1.01247	Yes
B000096	riboflavin biosynthesis protein RibF	0.813981	0.900537	0.919606	0.923573	0.916007	0.888996	0.865093	0.848991	0.818879	0.795509	0.923573	1.00861	No
B000097	glycyl-tRNA synthetase beta subunit	0.618768	0.688939	0.74693	0.765985	0.75853	0.73729	0.725071	0.708302	0.696803	0.671658	0.765985	1.0064	No
B000098	trmU tRNA (5-methylaminomethyl-2-thiouridylate)-methyltransferase	0.810808	0.899098	0.940428	0.938932	0.909879	0.876755	0.85179	0.821669	0.795905	0.765834	0.940428	1.0102	Yes
B000099	rpmI 50S ribosomal protein L35	0.832479	0.804991	0.76863	0.753252	0.739052	0.729235	0.728921	0.726626	0.724828	0.720835	0.832479	1.02309	No
B000100	hemE uroporphyrinogen decarboxylase	0.691904	0.776863	0.816982	0.809345	0.791965	0.777756	0.760691	0.738409	0.729338	0.702302	0.816982	1.00906	No
B000101	Rod shape-determining protein	0.676749	0.750709	0.771581	0.771856	0.761765	0.73973	0.724047	0.711494	0.702233	0.687471	0.771856	1.01112	No
B000102	rpmA 50S ribosomal protein L27	0.854236	0.836003	0.813393	0.799969	0.783892	0.779289	0.761161	0.750116	0.748562	0.745059	0.854236	1.01991	No
B000103	peptidyl-tRNA hydrolase	0.83268	0.897898	0.916486	0.913357	0.884247	0.871852	0.855168	0.822682	0.806934	0.784554	0.916486	1.01018	No
B000104	translation initiation factor IF-3	0.881886	0.878185	0.841579	0.812251	0.79187	0.772714	0.765571	0.753974	0.745634	0.743706	0.881886	1.01955	No
B000105	UDP-N-acetylmuramyl-tripeptide synthetase	0.80386	0.896828	0.944121	0.94969	0.945364	0.927108	0.910138	0.897155	0.876602	0.855928	0.94969	1.00511	Yes
B000106	rpmF 50S ribosomal protein L32	0.811997	0.792333	0.775169	0.757952	0.751357	0.732458	0.728329	0.727019	0.726693	0.724091	0.811997	1.02186	No
B000107	rplL 50S ribosomal protein L7/L12	0.884784	0.882849	0.863244	0.843985	0.823022	0.793092	0.77453	0.754983	0.748864	0.745135	0.884784	1.01925	No
B000108	leuS leucyl-tRNA synthetase	0.790553	0.891319	0.921536	0.91252	0.888612	0.86571	0.838797	0.809469	0.761464	0.748343	0.921536	1.01017	No
B000109	ligA NAD-dependent DNA ligase	0.792743	0.87665	0.92875	0.935312	0.934573	0.916165	0.900925	0.880212	0.856288	0.83882	0.935312	1.00582	Yes
B000110	cell division protein FtsA	0.843109	0.877009	0.864688	0.84387	0.821445	0.782936	0.75773	0.726674	0.717276	0.710658	0.877009	1.01512	No
B000111	GTP-binding protein TypA	0.852587	0.919618	0.915901	0.885413	0.852928	0.817318	0.787458	0.761395	0.755419	0.748256	0.919618	1.01285	No
B000112	ATP-dependent Clp protease, ATP-binding subunit ClpX	0.840988	0.9397	0.939587	0.911945	0.874489	0.847336	0.810427	0.791959	0.76819	0.752906	0.9397	1.01291	Yes
B000113	DNA replication and repair protein RecF	0.805433	0.889102	0.898463	0.898038	0.873121	0.862611	0.848433	0.824441	0.807779	0.789971	0.898463	1.00921	No
B000114	UDP-N-acetylenolpyruvoylglucosamine reductase	0.809111	0.896726	0.926312	0.940614	0.935394	0.925977	0.91144	0.889049	0.873028	0.846479	0.940614	1.00468	Yes

## Sheet: Table S3
Supplemental table S3. Genome-clustering performance versus ANI using a combined panel of 30 PhyEco marker genes % Identity cutoff: used to cut dendrogram of genomes and identify connected components (i.e. genome-clusters) TPR: true positive rate; PPV: positive predictive value (i.e. precision); F1-score: harmonic mean between TPR and PPV Training performance: performance for benchmark dataset of…
	Training Performance			Testing Performance
% Identity Cutoff	TPR	PPV	F1-score	TPR	PPV	F1-score
99	0.666636	0.999723	0.799889	0.668415	0.999862	0.801214
98.5	0.787364	0.999414	0.880806	0.789619	0.999534	0.882262
98	0.87216	0.999471	0.931485	0.872262	0.999578	0.93159
97.5	0.921762	0.9981	0.958413	0.923063	0.997613	0.958891
97	0.953076	0.988882	0.970649	0.953985	0.989594	0.971463
96.5*	0.974044	0.984134	0.979063	0.973495	0.986754	0.98008
96	0.984112	0.973413	0.978733	0.98187	0.974249	0.978045
95.5	0.989377	0.952089	0.970375	0.988496	0.953061	0.970455
95	0.993349	0.923011	0.956889	0.99365	0.927099	0.959222
94.5	0.993904	0.901022	0.945186	0.99457	0.90156	0.945784
94	0.994181	0.85761	0.920859	0.994662	0.861745	0.923445
93.5	0.994181	0.832405	0.906129	0.994662	0.83595	0.908426
*selected cutoff for identifying bacterial species

## Sheet: Table S4
Supplemental table S4. Annotations for 5,952 clusters of Bacterial genomes species_id: unique identifer for species (i.e. genome-cluster) genomes: total number of genomes in cluster genes: number of genes in genomes pangenes: number of 90% ID gene-clusters from genomes consensus name: most commonly annotated genus/species name consensus fraction: fraction of genomes with consensus genus/species n…
species_id	genomes	genes	pangenes	consensus_name	consensus_fraction	representative_genome_name
56630	4138	446813	10170	Staphylococcus aureus	0.999517	Staphylococcus aureus subsp. aureus IS-122
57684	3362	759876	22320	Streptococcus pneumoniae	1	Streptococcus pneumoniae SMRU2224
58110	2754	2305436	38996	Escherichia coli	0.948439	Escherichia coli O157:H43 str. T22
57439	2196	371334	16746	Mycobacterium tuberculosis	0.849271	Mycobacterium tuberculosis PanR0208
57014	952	914684	18307	Acinetobacter baumannii	0.997899	Acinetobacter baumannii BJAB0868
58156	918	1051326	23901	Salmonella enterica	1	Salmonella enterica subsp. enterica serovar Enteritidis str. EC20120528
57148	674	2414748	29064	Pseudomonas aeruginosa	0.994065	Pseudomonas aeruginosa AZPAE15040
57261	466	250428	6861	Brucella abortus	0.620172	Brucella abortus bv. 1 str. B02-0237
54788	358	961707	23115	Klebsiella pneumoniae	0.986033	Klebsiella pneumoniae BIDMC 4
56297	353	677165	18803	Enterococcus faecalis	0.994334	Enterococcus faecalis UAA1489
55593	291	373251	16538	Streptococcus agalactiae	1	Streptococcus agalactiae A909
56710	244	535857	11847	Enterococcus faecium	0.97541	Enterococcus faecium UC7266
56747	228	133841	4485	Streptococcus pyogenes	1	Streptococcus pyogenes M1 476
57034	221	660448	23568	Vibrio parahaemolyticus	0.99095	Vibrio parahaemolyticus S078
57608	217	495470	16834	Clostridium difficile	0.995392	Clostridium difficile CD132
57327	207	168076	8986	Vibrio cholerae	0.995169	Vibrio cholerae O1 str. 2010EL-1786
58195	199	547888	8131	Neisseria meningitidis	1	Neisseria meningitidis NM3684
56645	186	778552	14819	Leptospira interrogans	0.989247	Leptospira interrogans serovar Copenhageni str. P2518
56116	165	198352	4077	Streptococcus mutans	1	Streptococcus mutans 8ID3
54177	159	988764	19993	Burkholderia pseudomallei	0.830189	Burkholderia pseudomallei BPC006
56773	132	314316	9133	Yersinia pestis	0.856061	Yersinia pestis biovar Orientalis str. AS200901434
57688	115	279617	24652	Bacillus anthracis	0.565217	Bacillus anthracis str. Vollum
57666	113	166621	4394	Campylobacter jejuni	1	Campylobacter jejuni X
58296	104	287320	9607	Bordetella bronchiseptica	0.644231	Bordetella pertussis B1831
57367	102	111365	4624	Propionibacterium acnes	0.892157	Propionibacterium acnes
57523	93	210218	7071	Staphylococcus epidermidis	0.989247	Staphylococcus epidermidis NIH05001
57918	91	475198	36779	Bacillus cereus	0.527473	Streptococcus pneumoniae SMRU1024
54507	82	300837	18626	Bacteroides fragilis	0.963415	Bacteroides fragilis str. S36L11
57844	79	172934	13641	Mycobacterium abscessus	0.759494	Mycobacterium abscessus 3A-0122-R
58188	79	107486	5507	Helicobacter pylori	1	Helicobacter pylori wls-5-1
55246	78	15598	1155	Chlamydia trachomatis	1	Chlamydia trachomatis RC-F/69
56719	74	167380	7112	Xanthomonas axonopodis	1	Xanthomonas axonopodis pv. manihotis str. UG45
58148	71	210784	14106	Enterobacter cloacae	0.633803	Enterobacter cloacae ND21
58297	63	57843	3855	Helicobacter pylori	1	Helicobacter pylori HP250BFi
55666	56	151516	8486	Lactobacillus paracasei	0.607143	Lactobacillus paracasei subsp. paracasei Lpp189
58237	53	89895	4012	Campylobacter coli	1	Campylobacter coli LMG 23344
58298	51	67043	3856	Helicobacter pylori	1	Helicobacter pylori HP260AFi
56041	50	78062	3604	Oenococcus oeni	1	Oenococcus oeni IOEB_L18_3
57093	49	40348	2769	Francisella tularensis	0.877551	Francisella tularensis subsp. tularensis FSC198
56580	48	89926	5092	Listeria monocytogenes	1	Listeria monocytogenes N53-1
58172	48	151088	13024	Bacillus subtilis	0.916667	Bacillus subtilis BEST7613
57683	47	191685	10327	Xanthomonas axonopodis	0.510638	Xanthomonas citri pv. citri LE3-1
57980	47	171139	12804	Pseudomonas syringae	0.978723	Pseudomonas syringae pv. actinidiae PA459
57470	44	217165	15398	Salinispora arenicola	0.954545	Salinispora arenicola CNS744
57796	41	64702	6943	Bifidobacterium longum	0.97561	Bifidobacterium longum subsp. infantis 157F
53478	39	77816	4760	Listeria monocytogenes	1	Listeria monocytogenes BHU1
56613	39	22688	1794	Chlamydia psittaci	0.871795	Chlamydia psittaci 08DC60
56802	39	73202	3231	Streptococcus sobrinus	1	Streptococcus sobrinus TCI-124
57323	39	111167	9087	Acinetobacter baumannii	0.717949	Acinetobacter baumannii 25977_9
57660	39	145595	10144	Acinetobacter baumannii	0.564103	Acinetobacter baumannii 1289694
56142	38	160374	10271	Mycobacterium avium	0.921053	Mycobacterium avium subsp. paratuberculosis Pt146
57546	37	230622	19790	Mesorhizobium sp.	1	Mesorhizobium sp. LSHC440A00
58001	35	61438	4459	Haemophilus influenzae	0.971429	Haemophilus influenzae Hi359
57256	34	47922	3889	Rickettsia rickettsii	0.294118	Rickettsia slovaca 13-B
58197	34	53445	4507	Streptococcus suis	1	Streptococcus suis 98HAH33
57982	32	173612	21481	Bacillus cereus	0.8125	Bacillus cereus CER057
58141	32	47139	2982	Helicobacter pylori	1	Helicobacter pylori SA144C
58063	31	165766	17598	Streptomyces rimosus	0.741935	Streptomyces rimosus subsp. rimosus
56809	27	40373	3363	Kingella kingae	1	Kingella kingae KK260
56947	27	66120	5984	Enterococcus faecium	1	Enterococcus faecium E1007
57149	27	97620	7359	Bacillus amyloliquefaciens	0.62963	Bacillus methylotrophicus SK19.001
58050	27	192796	19434	Sinorhizobium meliloti	0.962963	Sinorhizobium meliloti GR4
57296	26	122579	9242	Leptospira kirschneri	0.961538	Leptospira kirschneri serovar Grippotyphosa str. 'Brem 127 Duyster'
57549	26	58697	5938	Lactobacillus rhamnosus	1	Lactobacillus rhamnosus 2166
57664	26	101317	10023	Clostridium botulinum	1	Clostridium botulinum CDC54088
57728	26	43321	4240	Prochlorococcus sp.	1	Prochlorococcus sp. scB245a_519D13
55151	24	110417	10137	Leptospira santarosai	0.916667	Leptospira santarosai str. HAI1349
57315	24	84286	7268	Legionella pneumophila	1	Legionella pneumophila str. Paris
58205	24	81767	9772	Serratia marcescens	0.875	Serratia marcescens MC458
56121	23	33526	2323	Borrelia burgdorferi	1	Borrelia burgdorferi Bol26
57270	22	28573	3323	Actinobacillus pleuropneumoniae	1	Actinobacillus pleuropneumoniae 5651
54610	21	64378	6240	Lactobacillus plantarum	1	Lactobacillus plantarum subsp. plantarum JCM 1149
54957	21	84015	10877	Streptomyces griseus	0.238095	Streptomyces purpeochromogenes
57930	21	48619	5529	Gallibacterium anatis	1	Gallibacterium anatis 10672-6
58282	21	17488	2393	Helicobacter pylori	1	Helicobacter pylori SA158C
55133	20	88534	8612	Vibrio cyclitrophicus	1	Vibrio cyclitrophicus ZF99
56569	20	92147	7210	Leptospira borgpetersenii	0.95	Leptospira borgpetersenii serovar Javanica str. L0864
57073	20	47873	6603	Lactococcus lactis	1	Lactococcus lactis subsp. lactis bv. diacetylactis str. TIFN4
50257	19	11053	3591	Bordetella holmesii	0.947368	Bordetella holmesii CDC-H643-BH
55799	19	75482	6657	Xanthomonas vasicola	0.526316	Xanthomonas campestris pv. musacearum NCPPB 4380
55943	19	17526	2585	Corynebacterium pseudotuberculosis	1	Corynebacterium pseudotuberculosis
56036	19	112849	12358	Bacillus cereus	0.894737	Bacillus cereus HuA2-3
57022	19	34982	3681	Pasteurella multocida	1	Pasteurella multocida 1500E
58116	19	6488	2048	Bifidobacterium animalis	1	Bifidobacterium animalis subsp. lactis BB-12
52955	18	10720	1726	Taylorella equigenitalis	1	Taylorella equigenitalis TE-002
53771	18	16718	1249	Tropheryma whipplei	1	Tropheryma whipplei str. Sali28
55742	18	12840	4808	Bacillus atrophaeus	0.944444	Bacillus atrophaeus ATCC 49822-2
57651	18	39381	7162	Yersinia enterocolitica	1	Yersinia enterocolitica subsp. palearctica 556/8265
57720	18	40071	3423	Aggregatibacter actinomycetemcomitans	1	Aggregatibacter actinomycetemcomitans serotype b str. I23C
53748	17	41644	3741	Neisseria gonorrhoeae	1	Neisseria gonorrhoeae FA6140
55106	17	34355	3646	Mannheimia haemolytica	1	Mannheimia haemolytica MhSwine2000
57294	17	86292	10850	Salinispora pacifica	1	Salinispora pacifica CNT603
57450	17	29666	5105	Fusobacterium nucleatum	0.941176	Fusobacterium nucleatum subsp. animalis 7_1 [PRJNA32483]
57511	17	21916	2525	Borrelia garinii	1	Borrelia garinii IPT89
54688	16	84553	9814	Klebsiella pneumoniae	0.625	Klebsiella pneumoniae MGH 80
55704	16	69814	8302	Enterobacter aerogenes	1	Enterobacter aerogenes UCI 46
56211	16	48793	5441	Acinetobacter baumannii	0.5	Acinetobacter baumannii 263903-1
56384	16	19187	2025	Lactobacillus iners	0.9375	Lactobacillus iners LEAF 2053A-b
56713	16	35920	4080	Corynebacterium diphtheriae	1	Corynebacterium diphtheriae 241
57937	16	62788	9374	Geobacillus kaustophilus	0.1875	Geobacillus sp. FW23
57955	16	69106	14588	Bacteroides vulgatus	0.4375	Bacteroides vulgatus ATCC 8482
56985	15	57238	10043	Parabacteroides distasonis	0.533333	Porphyromonas sp. 31_2
57088	15	63360	7121	Cronobacter sakazakii	1	Cronobacter sakazakii 701
57133	15	28095	3709	Bifidobacterium breve	1	Bifidobacterium breve DPC 6330
57753	15	46013	5245	Xylella fastidiosa	1	Xylella fastidiosa subsp. fastidiosa GB514
58066	15	78899	17072	Microcystis aeruginosa	0.933333	Microcystis aeruginosa TAIHU98
58105	15	65350	8587	Vibrio vulnificus	1	Vibrio vulnificus 99-796 DP-E7
55497	14	13077	1977	Bartonella quintana	1	Bartonella quintana JK 31
55765	14	16938	2027	Anaplasma marginale	1	Anaplasma marginale str. Florida (Prj:64631)
55908	14	29459	4033	Lactobacillus helveticus	1	Lactobacillus helveticus MTCC 5463
56468	14	36147	5480	Lactococcus lactis	1	Lactococcus lactis subsp. cremoris TIFN7
57540	14	48182	6561	Aeromonas hydrophila	0.714286	Aeromonas hydrophila 113
58106	14	67514	9623	Pseudomonas syringae	1	Pseudomonas syringae pv. atrofaciens str. DSM 50255
58165	14	71313	12376	Pseudomonas putida	0.928571	Pseudomonas putida ND6
58253	14	99954	15873	Burkholderia cenocepacia	0.785714	Burkholderia cenocepacia S2AES
53657	13	15516	3028	Flavobacterium psychrophilum	1	Flavobacterium psychrophilum V4-24
57232	13	80423	12255	Streptomyces griseus	0.230769	Streptomyces albus J1074
57474	13	29795	4643	Fusobacterium necrophorum	1	Fusobacterium necrophorum BFTR-1
57533	13	40609	8906	Comamonas testosteroni	0.923077	Comamonas testosteroni JC9
57703	13	61942	8372	Ralstonia solanacearum	1	Ralstonia solanacearum UW163
57856	13	60717	10560	Bacillus megaterium	0.538462	Bacillus megaterium NBRC 15308 = ATCC 14581
58011	13	24270	4425	Treponema denticola	1	Treponema denticola ATCC 35405
58295	13	22974	2239	Helicobacter pylori	1	Helicobacter pylori SA168A
51996	12	1892	913	Rickettsia prowazekii	1	Rickettsia prowazekii str. BuV67-CWPP
54763	12	9197	1494	Bartonella bacilliformis	1	Bartonella bacilliformis INS
55260	12	5366	1154	Treponema pallidum	0.916667	Treponema pallidum subsp. pallidum str. Mexico A
55777	12	23560	2754	Moraxella catarrhalis	1	Moraxella catarrhalis BC1
56101	12	25096	3772	Porphyromonas gingivalis	1	Porphyromonas gingivalis W50
56293	12	18692	3420	Thioalkalivibrio sp.	1	Thioalkalivibrio sp. AL5
56589	12	19295	4525	Erwinia amylovora	1	Erwinia amylovora 01SFR-BO
56762	12	70651	11451	Klebsiella oxytoca	0.833333	Klebsiella oxytoca
56788	12	26606	6063	Elizabethkingia anophelis	0.833333	Elizabethkingia anophelis NUH4
56840	12	37489	6296	Clostridium perfringens	1	Clostridium perfringens ATCC 13124
56965	12	25347	4331	Porphyromonas gulae	0.916667	Porphyromonas gulae COT-052_OH2857
57056	12	64854	9371	Mycobacterium intracellulare	0.5	Mycobacterium intracellulare M.i.198
57194	12	61703	10584	Pseudomonas syringae	0.75	Pseudomonas syringae pv. aesculi str. NCPPB 3681
57303	12	55260	9060	Enterobacter cloacae	0.416667	Enterobacter sp. MGH 16
57435	12	45570	9141	Salinispora pacifica	1	Salinispora pacifica CNT138
57463	12	62728	10093	Vibrio campbellii	0.833333	Vibrio campbellii 200612B
57500	12	40414	7134	Vibrio ordalii	0.5	Vibrio anguillarum 96F
57609	12	2948	1087	Chlamydia muridarum	1	Chlamydia muridarum str. Nigg CM972
57734	12	18187	3514	Fusobacterium nucleatum	0.916667	Fusobacterium nucleatum CC53
57782	12	44563	7692	Aeromonas hydrophila	1	Aeromonas hydrophila J-1
57880	12	26787	3475	Haemophilus parasuis	1	Haemophilus parasuis 29755
57956	12	29924	4843	Thioalkalivibrio sp.	1	Thioalkalivibrio sp. ALMg3
57997	12	24861	5881	Thermoanaerobacter ethanolicus	0.166667	Thermoanaerobacter brockii subsp. finnii Ako-1
58233	12	29958	6359	Acinetobacter lwoffii	0.5	Acinetobacter lwoffii NCTC 5866 = CIP 64.10
58263	12	60762	10702	Pseudomonas fluorescens	0.666667	Pseudomonas sp. WCS374
49575	11	55253	6055	Mycobacterium leprae	1	Mycobacterium leprae 7Q90
51143	11	1882	1847	Lactobacillus acidophilus	1	Lactobacillus acidophilus CFH
53050	11	50130	7541	Salinispora tropica	0.909091	Salinispora tropica CNS416
53221	11	22708	2848	Coxiella burnetii	1	Coxiella burnetii RSA 493
54362	11	69492	8804	Burkholderia thailandensis	1	Burkholderia thailandensis ATCC 700388
56148	11	39387	7844	Citrobacter freundii	0.545455	Citrobacter freundii NBRC 12681
56522	11	42988	5830	Bacillus pumilus	0.363636	Bacillus sp. UNC125MFCrub1.1
56845	11	20968	3496	Lactobacillus delbrueckii	1	Lactobacillus delbrueckii subsp. bulgaricus CNCM I-1519
56887	11	24393	4128	Lactobacillus crispatus	1	Lactobacillus crispatus FB049-03
56976	11	15244	4327	Corynebacterium glutamicum	0.818182	Corynebacterium glutamicum Z188
57101	11	54265	10430	Rhodococcus fascians	0.909091	Rhodococcus fascians LMG 3602
57591	11	54590	9493	Vibrio owensii	0.636364	Vibrio owensii LMG 25430
57887	11	61094	12151	Leptospira noguchii	0.818182	Leptospira noguchii str. Hook
57972	11	24351	4202	Thioalkalivibrio sp.	1	Thioalkalivibrio sp. ALgr5
58033	11	46659	6696	Bacillus licheniformis	0.909091	Bacillus licheniformis ATCC 14580 (Prj:13082)
58035	11	61296	15047	Bacteroides ovatus	0.636364	Bacteroides ovatus CL02T12C04
58072	11	76043	13454	Rhodococcus erythropolis	0.545455	Rhodococcus rhodochrous ATCC 17895
58251	11	47623	8205	Pantoea ananatis	1	Pantoea ananatis LMG 2665
58285	11	21813	3002	Streptococcus pneumoniae	0.636364	Streptococcus pneumoniae SMRU2944
54772	10	16046	2634	Streptococcus thermophilus	1	Streptococcus thermophilus ND03
55011	10	45259	7182	Enterobacter cloacae	0.5	Enterobacter sp. MGH 23
56823	10	25568	4445	Lactobacillus brevis	1	Lactobacillus brevis TMW 1.465
57025	10	36937	7729	Pseudomonas monteilii	0.3	Pseudomonas sp. LAMO17WK12:I4
57595	10	57372	10039	Bacillus cereus	0.4	Bacillus mycoides Rock1-4
57748	10	22467	4745	Streptococcus gallolyticus	0.5	Streptococcus gallolyticus subsp. gallolyticus ATCC 43143
57763	10	52790	10622	Vibrio jasicida	0.5	Vibrio harveyi BSW7
57890	10	53123	11008	Pseudomonas putida	0.3	Pseudomonas monteilii SB3101
57960	10	36845	9741	Xenorhabdus bovienii	1	Xenorhabdus bovienii str. feltiae Florida
58155	10	35752	6406	Aeromonas veronii	0.8	Aeromonas veronii bv. veronii CECT 4257
50266	9	3308	1681	Helicobacter pylori	1	Helicobacter pylori 26695
53943	9	11523	2219	Bartonella henselae	1	Bartonella henselae str. Zeus
54035	9	18009	3101	Lactobacillus fermentum	1	Lactobacillus fermentum Lf1
54123	9	50245	7857	Klebsiella oxytoca	0.888889	Klebsiella oxytoca KA-2
55393	9	4816	1712	Helicobacter pylori	1	Helicobacter pylori SA165C
56291	9	43466	8070	Vibrio alginolyticus	0.444444	Vibrio alginolyticus BSW15
56361	9	38676	7466	Clostridium butyricum	1	Clostridium butyricum E4 str. BoNT E BL5262
56861	9	37682	5948	Cronobacter malonaticus	0.888889	Cronobacter sakazakii CMCC 45402
56918	9	15516	2879	Prochlorococcus sp.	1	Prochlorococcus sp. scB245a_518A6
56954	9	13315	2367	Anaplasma phagocytophilum	1	Anaplasma phagocytophilum Dog2
57135	9	33972	6886	Alteromonas macleodii	1	Alteromonas macleodii AltDE1
57158	9	57469	11036	Clostridium bolteae	0.666667	Clostridium bolteae 90A9
57185	9	39951	9476	Bacteroides xylanisolvens	0.555556	Bacteroides sp. D1
57335	9	41030	6905	Xanthomonas oryzae	1	Xanthomonas oryzae pv. oryzae PXO99A
57436	9	39890	6994	Xanthomonas arboricola	1	Xanthomonas arboricola pv. pruni str. MAFF 311562
57467	9	42587	7312	Shewanella baltica	1	Shewanella baltica OS678
57582	9	30378	7097	Serratia plymuthica	0.666667	Serratia plymuthica S13
57825	9	63805	16775	Streptomyces globisporus	0.222222	Streptomyces roseosporus NRRL 11379
57868	9	76605	18398	Bradyrhizobium japonicum	1	Bradyrhizobium japonicum USDA 6
57907	9	35232	7005	Escherichia coli	0.555556	Escherichia coli KTE31
58081	9	26681	6271	Colwellia sp.	0.111111	Pseudoalteromonas sp. 23_GOM-1509m
58090	9	46045	8851	Leptospira weilii	0.888889	Leptospira weilii str. UI 13098
58140	9	12051	2153	Gardnerella vaginalis	1	Gardnerella vaginalis ATCC 14019
58142	9	40143	8088	Enterobacter asburiae	0.222222	Enterobacter cloacae UCI 49
58153	9	23810	4452	Clostridium botulinum	1	Clostridium botulinum BKT015925
58200	9	57511	13995	Delftia acidovorans	0.333333	Chryseobacterium taeanense ARB2
58286	9	11623	2560	Wolbachia endosymbiont	0.777778	Wolbachia endosymbiont of Culex pipiens molestus
51842	8	42078	8663	Clostridium clostridioforme	1	Clostridium clostridioforme 90A1
52119	8	4922	1046	Ehrlichia chaffeensis	1	Ehrlichia chaffeensis str. Heartland
53261	8	16050	2540	Campylobacter fetus	1	Campylobacter fetus subsp. venerealis B6
53264	8	593	592	Buchnera aphidicola	1	Buchnera aphidicola str. TLW03 (Acyrthosiphon pisum)
54043	8	12095	2747	Staphylococcus lugdunensis	0.875	Staphylococcus aureus UCIM6116
55046	8	28586	5146	Proteus mirabilis	1	Proteus mirabilis ATCC 29906
55805	8	13183	2458	Lactobacillus gasseri	1	Lactobacillus gasseri SJ-9E-US
55946	8	43534	8114	Vibrio harveyi	0.875	Vibrio sp. HENC-01
56213	8	52622	11796	Sinorhizobium fredii	1	Sinorhizobium fredii CCBAU 83753
56603	8	14609	3457	Lactococcus garvieae	1	Lactococcus garvieae LG9
56672	8	16355	4041	Lactobacillus salivarius	1	Lactobacillus salivarius JCM1046
56916	8	30873	7321	Planktothrix agardhii	0.375	Planktothrix agardhii NIVA-CYA 34
56971	8	37850	9774	Burkholderia multivorans	1	Burkholderia multivorans ATCC 17616 (Prj:19401)
57245	8	39144	8717	Vibrio splendidus	1	Vibrio splendidus ZF-90
57250	8	19242	5027	Acinetobacter haemolyticus	0.875	Acinetobacter haemolyticus CIP 64.3
57597	8	35882	6061	Aeromonas salmonicida	1	Aeromonas salmonicida subsp. salmonicida 01-B526
57657	8	29389	5823	Acinetobacter calcoaceticus	1	Acinetobacter calcoaceticus TG19588
57727	8	27927	5659	Vibrio mimicus	1	Vibrio mimicus CAIM 1882
57857	8	31166	5724	Bacillus pumilus	0.5	Bacillus pumilus CCMA-560
57942	8	17011	3356	Streptococcus equi	1	Streptococcus equi subsp. zooepidemicus ATCC 35246
57957	8	9937	3076	Lactobacillus reuteri	1	Lactobacillus reuteri MM2-3
57978	8	46734	8992	Pseudomonas brassicacearum	0.375	Pseudomonas fluorescens Q8r1-96
58032	8	13990	2998	Streptococcus anginosus	0.5	Streptococcus anginosus F0211
58037	8	15916	3403	Streptococcus salivarius	0.625	Streptococcus sp. HSISS1
58065	8	23002	5162	Acinetobacter parvus	0.25	Acinetobacter sp. CIP 102143
58113	8	47166	10864	Bacillus cereus	1	Bacillus cereus BAG6X1-1
58149	8	14066	3707	Clostridium tetani	1	Clostridium tetani ATCC 19406
58179	8	15691	3920	Capnocytophaga ochracea	0.375	Capnocytophaga ochracea F0287
58215	8	28209	5935	Myroides odoratimimus	0.75	Myroides sp. A21
58217	8	72594	24792	Rhodococcus opacus	0.25	Rhodococcus sp. JVH1
58236	8	17529	3877	Streptococcus dysgalactiae	1	Streptococcus dysgalactiae subsp. equisimilis SK1249
58243	8	11650	2912	Corynebacterium accolens	0.25	Corynebacterium sp. KPL1996
58271	8	13246	2581	Helicobacter pylori	1	Helicobacter pylori NAB47
58287	8	38166	6992	Enterobacter cloacae	0.875	Enterobacter cloacae subsp. cloacae ATCC 13047
45571	7	8929	4402	Dickeya solani	0.857143	Dickeya solani IFB 0099
52923	7	27564	5465	Bordetella hinzii	1	Bordetella hinzii L60
53488	7	12167	4087	Clostridium tyrobutyricum	1	Clostridium tyrobutyricum DIVETGP
53866	7	33657	8154	Streptomyces albus	0.428571	Streptomyces graminis
54124	7	40624	8752	[Kitasatospora] papulosa	0.142857	Streptomyces fulvoviridis
54897	7	10283	2207	Dehalococcoides mccartyi	0.571429	Dehalococcoides mccartyi
55065	7	11266	2573	Bifidobacterium bifidum	1	Bifidobacterium bifidum ATCC 29521 = JCM 1255
55855	7	27261	6103	Providencia alcalifaciens	1	Providencia alcalifaciens F90-2004
56420	7	43057	9666	Mycobacterium marinum	0.571429	Mycobacterium sp. 012931
56596	7	32944	8026	Erysipelotrichaceae bacterium	0.428571	Erysipelotrichaceae bacterium 21_3
56659	7	11805	2952	Propionibacterium avidum	0.428571	Propionibacterium avidum TM16
56884	7	18113	4009	Clostridium novyi	0.285714	Clostridium haemolyticum NCTC 9693
56895	7	13319	3358	Leuconostoc mesenteroides	1	Leuconostoc mesenteroides subsp. cremoris ATCC 19254
57028	7	9646	2813	Streptococcus intermedius	1	Streptococcus intermedius JTH08
57109	7	39572	9278	Agrobacterium rhizogenes	0.285714	Agrobacterium rhizogenes CF262
57278	7	14557	3310	Staphylococcus haemolyticus	0.857143	Staphylococcus haemolyticus C10A
57318	7	28440	8256	Bacteroides uniformis	0.714286	Bacteroides uniformis ATCC 8492
57337	7	36022	7906	Klebsiella pneumoniae	0.571429	Klebsiella sp. 07A044
57363	7	27666	6357	Morganella morganii	0.857143	Morganella morganii 340
57381	7	16749	3318	Clostridium novyi	0.857143	Clostridium botulinum C/D str. It1
57406	7	15965	5160	Acinetobacter junii	1	Acinetobacter junii MTCC 11364
57465	7	9456	2056	Wolbachia endosymbiont	0.571429	Wolbachia endosymbiont of Drosophila melanogaster
57487	7	31189	5985	Xanthomonas campestris	1	Xanthomonas campestris pv. campestris str. Xca5
57565	7	18007	4580	Rhodobacter capsulatus	1	Rhodobacter capsulatus DE442
57606	7	16435	4184	Thioalkalivibrio sp.	1	Thioalkalivibrio sp. ALE18
57814	7	31876	7814	Raoultella planticola	0.285714	Escherichia coli 2-156-04_S1_C2
57908	7	21647	6705	Pseudoalteromonas haloplanktis	0.714286	Pseudoalteromonas haloplanktis TB25
57951	7	12679	2983	Streptococcus equinus	0.571429	Streptococcus sp. HSISB1
58007	7	46497	14911	Streptomyces flaveolus	0.142857	Streptomyces sp. NRRL F-3307
58040	7	12533	3086	Bifidobacterium thermacidophilum	0.571429	Bifidobacterium thermophilum RBL67
58069	7	37293	8569	Paenibacillus polymyxa	0.857143	Paenibacillus sp. ICGEB2008
58080	7	43441	8908	Pseudomonas chlororaphis	1	Pseudomonas chlororaphis O6
58212	7	17421	5650	Helicobacter bilis	0.714286	Helicobacter bilis ATCC 51630
42814	6	5077	5066	Afipia sp.	1	Afipia sp. OHSU_I-uncloned
47596	6	1986	1978	Prochlorococcus marinus	0.833333	Prochlorococcus marinus subsp. marinus str. CCMP1375
51468	6	23323	5174	Pelosinus fermentans	0.833333	Pelosinus fermentans B3
51469	6	16386	3944	Clostridium thermocellum	1	Clostridium thermocellum DSM 1313
52435	6	19081	4297	Edwardsiella tarda	0.666667	Edwardsiella tarda ET081126R
52591	6	29386	6208	Frankia sp.	1	Frankia sp. Thr
53052	6	4633	1662	Candidatus Arthromitus	1	Candidatus Arthromitus sp. SFB-mouse-SU
53134	6	41736	9999	Sinorhizobium medicae	0.833333	Sinorhizobium meliloti WSM4191
53492	6	26936	6121	Escherichia coli	0.666667	Escherichia coli KTE96
53510	6	12963	3083	Streptococcus parauberis	1	Streptococcus parauberis KRS-02083
54667	6	10858	2579	Leuconostoc citreum	1	Leuconostoc citreum KM20
55612	6	27922	6462	Enterobacter cloacae	0.5	Enterobacter cloacae EcWSU1
55719	6	8756	2752	Bifidobacterium dentium	0.833333	Bifidobacterium dentium ATCC 27678
55788	6	33917	9404	Rhodococcus fascians	0.666667	Rhodococcus fascians A44A A44a
55841	6	30624	9089	Bacillus cereus	1	Bacillus cereus AH1273
55843	6	28421	6113	Xanthomonas perforans	0.333333	Xanthomonas campestris pv. vesicatoria str. 85-10
56105	6	14110	2929	Corynebacterium ulcerans	1	Corynebacterium ulcerans 0102
56128	6	17720	4249	Treponema pedis	1	Treponema pedis isoM1220
56197	6	8452	1811	Helicobacter pylori	1	Helicobacter pylori SA216C
56341	6	7765	2437	Borrelia crocidurae	0.5	Borrelia duttonii Ly
56419	6	13971	4953	Clostridium botulinum	1	Clostridium botulinum E3 str. Alaska E43
56479	6	26929	8362	Clostridium beijerinckii	0.666667	Clostridium beijerinckii NCIMB 8052
56514	6	13395	4753	Enterococcus casseliflavus	0.666667	Enterococcus casseliflavus EC10
56648	6	30356	7417	Ralstonia pickettii	0.333333	Ralstonia sp. JGI 0001001-A05
56763	6	43957	10353	Streptomyces sp.	1	Streptomyces sp. CNQ865
56815	6	9238	3272	Bifidobacterium adolescentis	0.666667	Bifidobacterium stercoris
56867	6	30544	6426	Stenotrophomonas maltophilia	1	Stenotrophomonas maltophilia EPM1
56930	6	7674	2437	Francisella philomiragia	1	Francisella philomiragia O#319-067
56951	6	27006	6395	Pantoea agglomerans	0.833333	Pantoea agglomerans Eh318
57040	6	21723	6576	Pseudoalteromonas haloplanktis	0.333333	Pseudoalteromonas sp. S8-38
57221	6	24584	6037	Aeromonas caviae	0.666667	Aeromonas caviae CECT 838
57225	6	27240	6849	Vibrio fluvialis	0.666667	Vibrio fluvialis PG41
57243	6	11704	3173	Pediococcus acidilactici	0.833333	Pediococcus acidilactici AGR20
57284	6	23022	7013	Butyrivibrio fibrisolvens	1	Butyrivibrio fibrisolvens WTE3004
57416	6	26584	7419	Pseudomonas stutzeri	1	Pseudomonas stutzeri T13
57566	6	12090	2746	Zymomonas mobilis	1	Zymomonas mobilis subsp. mobilis ZM4 = ATCC 31821
57593	6	17633	5180	Phaeobacter gallaeciensis	0.166667	Phaeobacter gallaeciensis ANG1
57710	6	34602	8007	Vibrio nigripulchritudo	1	Vibrio nigripulchritudo Wn13
57855	6	14542	4352	Fusobacterium nucleatum	0.666667	Fusobacterium nucleatum subsp. polymorphum F0401
57865	6	25976	7078	Pectobacterium carotovorum	1	Pectobacterium carotovorum subsp. brasiliense
57944	6	29019	8422	Pseudomonas umsongensis	0.333333	Pseudomonas sp. 35MFCvi1.1
57977	6	31994	8611	Vibrio coralliilyticus	0.833333	Vibrio coralliilyticus P1
58025	6	13584	3764	Thermus thermophilus	0.833333	Thermus thermophilus HB8
58053	6	9681	2943	Staphylococcus warneri	0.666667	Staphylococcus warneri SG1
58108	6	19343	4064	Piscirickettsia salmonis	1	Piscirickettsia salmonis A1-15972
58161	6	13678	2974	Streptococcus sanguinis	1	Streptococcus sanguinis SK1
58169	6	11182	2863	Veillonella atypica	0.5	Veillonella atypica ACS-134-V-Col7a
58178	6	13145	4857	Acinetobacter johnsonii	0.833333	Acinetobacter johnsonii TG19605
58209	6	16260	6077	Acinetobacter sp.	1	Acinetobacter sp. MN12
58218	6	45898	15875	Bradyrhizobium elkanii	1	Bradyrhizobium elkanii CCBAU 43297
58270	6	45671	12481	Rhizobium leguminosarum	0.833333	Rhizobium leguminosarum bv. trifolii CC283b
48834	5	2307	2287	Corynebacterium sp.	1	Corynebacterium sp. KPL1821
50467	5	6146	2056	Streptococcus iniae	1	Streptococcus iniae
51815	5	9279	1999	Bartonella birtlesii	1	Bartonella birtlesii E11
52632	5	38493	5203	Dickeya dianthicola	0.8	Dickeya dianthicola NCPPB 453
52743	5	17685	4962	Clostridiales bacterium	0.2	Coprobacillus sp. 3_3_56FAA
53746	5	17116	4152	Edwardsiella tarda	0.8	Edwardsiella tarda EIB202
53752	5	12515	4667	Bacillus amyloliquefaciens	0.8	Bacillus subtilis ATCC 13952
54097	5	10915	3017	Acidaminococcus intestini	0.4	Acidaminococcus intestini RyC-MR95
54194	5	3465	1284	Chlamydophila pneumoniae	1	Chlamydophila pneumoniae AR39
54399	5	6220	2177	Riemerella anatipestifer	1	Riemerella anatipestifer RA-SG
54790	5	12026	3400	Prevotella sp.	1	Prevotella sp. P5-125
55194	5	10866	3155	Prevotella bivia	1	Prevotella bivia JCVIHMP010
55595	5	12008	3092	Staphylococcus capitis	0.8	Staphylococcus capitis SK14
55861	5	31617	9421	Pseudomonas aeruginosa	1	Pseudomonas aeruginosa VRFPA01
56022	5	24046	6987	Citrobacter braakii	0.4	Citrobacter freundii str. ballerup 7851/39
56276	5	22872	6309	Escherichia albertii	1	Escherichia albertii TW07627
56337	5	8604	3203	Listeria monocytogenes	1	Listeria monocytogenes L99
56370	5	18799	6228	Acinetobacter bereziniae	0.8	Acinetobacter bereziniae
56470	5	23460	9126	Clostridiales bacterium	0.2	Clostridiales bacterium VE202-03
56507	5	13645	3913	Prevotella denticola	1	Prevotella denticola JCM 13449
56572	5	26684	8317	Agrobacterium sp.	0.2	Agrobacterium sp. 33MFTa1.1
56758	5	33966	11526	Pseudomonas fuscovaginae	1	Pseudomonas fuscovaginae CB98818
57007	5	21947	6880	Sphingobium japonicum	0.2	Sphingobium indicum B90A
57055	5	11149	2894	Staphylococcus hominis	0.8	Staphylococcus hominis VCU122
57061	5	8376	2938	Lactococcus garvieae	1	Lactococcus garvieae MT14
57108	5	18447	5566	Pseudomonas oleovorans	0.2	Pseudomonas sp. MOIL14HWK12:I1
57110	5	6792	1862	Candidatus Pelagibacter	1	Candidatus Pelagibacter ubique HTCC1013
57140	5	21747	5841	Cronobacter dublinensis	1	Cronobacter dublinensis subsp. lausannensis LMG 23824
57162	5	22866	6640	Teredinibacter turnerae	1	Teredinibacter turnerae T7902
57163	5	11282	3495	Porphyromonas macacae	1	Porphyromonas macacae JCM 13914
57166	5	20217	5561	Cellulophaga baltica	0.8	Cellulophaga baltica 4
57293	5	9254	2796	Finegoldia magna	1	Finegoldia magna ALB8
57300	5	21980	5888	Rhodobacter sphaeroides	0.8	Rhodobacter sphaeroides 2.4.1
57339	5	24990	7618	Ochrobactrum intermedium	0.8	Ochrobactrum intermedium M86
57345	5	11312	3242	Fusobacterium nucleatum	1	Fusobacterium nucleatum ChDC F145
57376	5	15307	4467	Acinetobacter schindleri	0.6	Acinetobacter schindleri CIP 107287
57377	5	20762	5320	Vibrio sinaloensis	0.6	Vibrio sinaloensis AD032
57462	5	8850	2601	Streptococcus suis	1	Streptococcus suis YS44
57504	5	21588	6425	Vibrio crassostreae	1	Vibrio crassostreae 9ZC13
57517	5	7951	2647	Streptococcus sobrinus	0.8	Streptococcus sobrinus TCI-349
57559	5	23762	6914	Ralstonia solanacearum	1	Ralstonia solanacearum SD54
57587	5	29180	10007	Methylobacterium extorquens	1	Methylobacterium extorquens DSM 13060
57663	5	9038	2853	Lactobacillus johnsonii	1	Lactobacillus johnsonii ATCC 33200
57674	5	11614	4125	Enterococcus mundtii	1	Enterococcus mundtii ATCC 882 [PRJNA206354]
57693	5	26420	8437	Desulfitobacterium hafniense	1	Desulfitobacterium hafniense DP7
57698	5	18411	5424	Acinetobacter baumannii	0.6	Acinetobacter baumannii 1437282
57715	5	3734	2086	Thermotoga sp.	1	Thermotoga sp. TBGT1766
57742	5	5658	2025	Lebetimonas sp.	1	Lebetimonas sp. JS085
57794	5	9636	2898	Veillonella parvula	0.4	Veillonella parvula ATCC 17745
57806	5	12663	5260	Bacillus subtilis	1	Bacillus subtilis subsp. spizizenii ATCC 6633
57819	5	6620	1887	Helicobacter pylori	1	Helicobacter pylori Hp P-15b
57834	5	38992	11106	Rhizobium leguminosarum	1	Rhizobium leguminosarum bv. viciae Ps8
57842	5	26729	5728	Dickeya solani	0.2	Dickeya chrysanthemi M074
57954	5	34908	6169	Dickeya chrysanthemi	0.8	Dickeya zeae Ech1591
57973	5	19293	6442	Marinobacter hydrocarbonoclasticus	0.2	Marinobacter hydrocarbonoclasticus ATCC 49840
57974	5	17070	5186	Pseudomonas fulva	0.4	Pseudomonas fulva NBRC 16637 = DSM 17717
58002	5	9330	3432	Fusobacterium periodonticum	1	Fusobacterium periodonticum 2_1_31
58038	5	19437	6000	Clostridium sporogenes	0.6	Clostridium sporogenes
58042	5	19010	6874	Pseudoalteromonas piscicida	0.4	Pseudoalteromonas piscicida ATCC 15057
58046	5	28757	12380	Bacteroides cellulosilyticus	0.6	Bacteroides cellulosilyticus DSM 14838
58056	5	26863	8784	Paenibacillus polymyxa	0.6	Paenibacillus sp. UNCCL52
58128	5	28927	8240	Achromobacter undefined	1	Achromobacter undefined 6241_spades_final
58129	5	37624	11461	Rhizobium leguminosarum	1	Rhizobium leguminosarum bv. viciae WSM1481
58220	5	17383	5663	Bacteroides pyogenes	1	Bacteroides pyogenes JCM 6292
58262	5	37390	14225	Streptomyces griseus	0.6	Streptomyces griseus subsp. griseus
58265	5	20795	6257	Xanthomonas sacchari	0.6	Xanthomonas sacchari LMG 476
35073	4	7210	7205	Streptomyces sp.	1	Streptomyces sp. NRRL F-6674
40295	4	11540	5814	Mesorhizobium sp.	1	Mesorhizobium sp. NBIMC_P2-C1
44952	4	7525	3909	Synechocystis sp.	1	Synechocystis sp. PCC 6803 substr. PCC-N
45090	4	3999	3978	Leptospira licerasiae	1	Leptospira licerasiae serovar Varillal str. VAR 010
46940	4	1639	1620	Hydrogenobaculum sp.	1	Hydrogenobaculum sp. SHO
48298	4	7369	7349	Streptomyces sp.	1	Streptomyces sp. KhCrAH-40
48553	4	6757	6560	Mycobacterium smegmatis	1	Mycobacterium smegmatis INHR2
50340	4	4700	1262	Candidatus Liberibacter	1	Candidatus Liberibacter asiaticus str. gxpsy
50390	4	3814	1332	Weissella ceti	1	Weissella ceti
50409	4	6504	2159	Streptococcus constellatus	1	Streptococcus constellatus subsp. pharyngis C818
50902	4	8125	2820	Propionibacterium acnes	0.75	Propionibacterium acnes HL037PA2
51113	4	596	596	Buchnera aphidicola	1	Buchnera aphidicola str. W106 (Myzus persicae)
51870	4	8354	3536	Lachnospiraceae bacterium	0.75	Lachnospiraceae bacterium 8_1_57FAA
52312	4	13320	4204	Enterococcus gallinarum	0.5	Enterococcus sp. HSIEG1
52672	4	8147	2676	Porphyromonas crevioricanis	0.75	Porphyromonas crevioricanis JCM 15906
53023	4	20581	5249	Xenorhabdus nematophila	1	Xenorhabdus nematophila str. Websteri
53468	4	16990	5482	Geobacillus thermoglucosidasius	0.5	Geobacillus thermoglucosidasius NBRC 107763
53776	4	21298	6499	Brevibacillus borstelensis	1	Brevibacillus borstelensis AK1
53996	4	20061	5691	Pandoraea pnomenusa	0.5	Pandoraea sp. E26
54029	4	20225	7651	Clostridium symbiosum	0.75	Clostridium symbiosum ATCC 14940
54058	4	5125	1787	Borrelia afzelii	1	Borrelia afzelii ACA-1
54104	4	18410	5559	Bacillus licheniformis	0.25	Bacillus sp. CPSM8
54300	4	21847	6819	Brevibacillus agri	0.5	Brevibacillus agri BAB-2500
54358	4	2993	1061	Chlamydia pecorum	0.75	Chlamydia pecorum W73
54407	4	30292	10566	Streptomyces aureofaciens	0.5	Streptomyces aureofaciens
54539	4	19700	7955	Streptomyces griseolus	0.25	Streptomyces griseolus
54575	4	10385	3321	Staphylococcus saprophyticus	0.75	Staphylococcus saprophyticus subsp. saprophyticus KACC 16562
54642	4	23482	9442	Bacteroides sartorii	0.5	Bacteroides sartorii JCM 16497
54929	4	14995	6369	Pantoea stewartii	1	Pantoea stewartii M073a
54937	4	20696	7256	Rhodococcus pyridinivorans	0.5	Rhodococcus sp. Chr-9
55016	4	9506	3118	Cycloclasticus pugetii	0.25	Cycloclasticus sp. P1
55037	4	25825	7071	Mycobacterium kansasii	1	Mycobacterium kansasii ATCC 12478
55131	4	10863	3457	Enterococcus hirae	0.5	Enterococcus faecium 70-61-3
55206	4	11774	4024	butyrate-producing bacterium	0.25	butyrate-producing bacterium SSC/2
55543	4	13648	4798	Bacillus coagulans	1	Bacillus coagulans H-1
55547	4	21998	8633	Sphingomonas wittichii	0.5	Sphingomonas wittichii DP58
55617	4	15149	5255	Acidiphilium multivorum	0.25	Acidiphilium cryptum JF-5
55683	4	6637	2669	Corynebacterium pseudodiphtheriticum	0.5	Corynebacterium sp. KPL1995
55708	4	8938	2878	Mobiluncus mulieris	1	Mobiluncus mulieris 28-1
55856	4	6956	2278	Pediococcus pentosaceus	1	Pediococcus pentosaceus IE-3
55874	4	15609	4968	Vibrio genomosp.	1	Vibrio genomosp. F10 str. 9ZC157
55915	4	14540	5237	Enterococcus faecalis	0.25	Enterococcus casseliflavus ATCC 12755
55935	4	24973	7237	Pseudomonas protegens	0.75	Pseudomonas protegens Pf-5
56075	4	32768	9970	Bradyrhizobium japonicum	0.25	Bradyrhizobium sp. CCBAU 15615
56081	4	9270	2581	Staphylococcus schleiferi	1	Staphylococcus schleiferi 2317
56215	4	7741	2755	Rickettsia tamurae	0.25	Rickettsia sp. ISO7
56249	4	24058	7968	Achromobacter xylosoxidans	0.75	Achromobacter xylosoxidans C54
56275	4	11651	4577	Lachnospiraceae bacterium	0.5	Lachnospiraceae bacterium 9_1_43BFAA
56287	4	15266	5254	Bacillus coagulans	1	Bacillus coagulans 36D1
56408	4	8579	2893	Prevotella amnii	1	Prevotella amnii JCM 14753
56447	4	14092	4305	Nitrosococcus oceani	1	Nitrosococcus oceani ATCC 19707
56460	4	19316	6912	Photorhabdus luminescens	1	Photorhabdus luminescens NBAII H75HRPL105
56463	4	12620	4312	Eggerthella lenta	0.5	Eggerthella sp. HGA1
56492	4	7529	4277	Clostridium acetobutylicum	1	Clostridium acetobutylicum EA 2018
56548	4	19412	7858	Bacteroides fragilis	0.75	Bacteroides sp. UW 1
56600	4	25792	9985	Bradyrhizobium japonicum	0.5	Bradyrhizobium sp. CCBAU 41267
56627	4	13102	4080	Edwardsiella tarda	1	Edwardsiella tarda NBRC 105688
56644	4	2807	1476	Bifidobacterium indicum	0.5	Bifidobacterium indicum LMG 11587 = DSM 20214
56683	4	14630	6393	Halomonas titanicae	0.25	Halomonas sp. 23_GOM-1509m
56724	4	30554	11338	Burkholderia gladioli	0.75	Burkholderia gladioli NBRC 13700
56726	4	22636	9070	Streptomyces lavendulae	0.25	Streptomyces sp. NRRL B-1322
56759	4	17435	5962	Shewanella putrefaciens	0.75	Shewanella putrefaciens CN-32
56774	4	15256	5106	Pseudoalteromonas marina	0.25	Pseudoalteromonas marina mano4
56782	4	6528	1740	Helicobacter pylori	1	Helicobacter pylori oki422
56829	4	8362	2580	Fusobacterium nucleatum	1	Fusobacterium nucleatum CTI-2
56833	4	32326	10794	Lachnospiraceae bacterium	0.5	Lachnospiraceae bacterium VE202-12
56890	4	29421	5318	Dickeya zeae	1	Dickeya zeae NCPPB 3532
56915	4	16342	5411	Pseudoalteromonas citrea	0.25	Pseudoalteromonas sp. Bsw20308
56920	4	13891	4375	Yersinia ruckeri	1	Yersinia ruckeri CSF007-82
56939	4	17983	5880	Teredinibacter turnerae	1	Teredinibacter turnerae T8415
56941	4	20081	8495	Bacteroides thetaiotaomicron	0.5	Bacteroides sp. 1_1_6
56946	4	10079	3375	Brachyspira pilosicoli	1	Brachyspira pilosicoli 95/1000
56996	4	8279	4125	Peptoniphilus lacrimalis	0.75	Peptoniphilus sp. oral taxon 836 str. F0141
57020	4	8462	3187	Lactobacillus ruminis	1	Lactobacillus ruminis ATCC 25644
57058	4	11662	4396	Prevotella oris	1	Prevotella oris DSM 18711
57107	4	10160	5851	Afipia broomeae	0.25	Afipia sp. NBIMC_P1-C3
57128	4	7131	2456	Bifidobacterium gallinarum	0.5	Bifidobacterium gallinarum
57180	4	21789	7205	Pseudomonas fluorescens	0.75	Pseudomonas fluorescens AU12271
57192	4	13932	4900	Clostridium bifermentans	0.75	Clostridium bifermentans ATCC 19299
57275	4	17869	7030	Anoxybacillus ayderensis	0.25	Anoxybacillus flavithermus
57297	4	25437	5657	Dickeya zeae	1	Dickeya zeae ZJU1202
57324	4	19084	6568	Brevibacillus laterosporus	1	Brevibacillus laterosporus LMG 15441
57328	4	15767	5062	Vibrio navarrensis	1	Vibrio navarrensis 0053-83
57338	4	6749	2654	Rothia aeria	0.5	Rothia dentocariosa C6D
57351	4	18320	6585	Vibrio tasmaniensis	0.75	Vibrio tasmaniensis 1F-267
57371	4	8872	2835	Streptococcus suis	1	Streptococcus suis 93A
57483	4	5576	2238	Thermotoga maritima	0.25	Thermotoga sp. 2812B
57496	4	13784	4878	Acinetobacter ursingii	0.75	Acinetobacter baumannii 479375
57529	4	13857	4247	Gluconobacter thailandicus	0.5	Gluconobacter thailandicus NBRC 3257
57536	4	26711	10133	Rhodopirellula baltica	1	Rhodopirellula baltica WH47
57558	4	21261	6444	Pseudomonas viridiflava	1	Pseudomonas viridiflava LMCA8
57562	4	9711	3955	Thermus scotoductus	0.75	Thermus scotoductus SA-01
57576	4	9162	3271	Arcobacter butzleri	1	Arcobacter butzleri RM4018
57577	4	10336	3007	Granulibacter bethesdensis	1	Granulibacter bethesdensis CGDNIH1
57580	4	28416	9769	Streptomyces sp.	1	Streptomyces sp. NRRL F-5635
57629	4	13498	5908	Acinetobacter guillouiae	0.75	Acinetobacter guillouiae MSP4-18
57638	4	13906	5535	Ruminococcus gnavus	0.75	Lachnospiraceae bacterium 2_1_58FAA
57640	4	6678	2576	Bibersteinia trehalosi	1	Bibersteinia trehalosi USDA-ARS-USMARC-189
57644	4	16356	5514	Alteromonas macleodii	1	Alteromonas macleodii str. 'English Channel 673'
57652	4	25899	8825	Rhizobium etli	0.5	Rhizobium etli CNPAF512
57671	4	13352	4555	Sulfitobacter pontiacus	0.25	Sulfitobacter pontiacus 3SOLIMAR09
57687	4	5340	1943	Streptococcus oralis	0.25	Streptococcus sp. BS21
57767	4	7568	2806	Streptococcus constellatus	0.5	Streptococcus constellatus KCOM 1650
57780	4	22886	8898	Rhodococcus fascians	1	Rhodococcus fascians 04-516
57801	4	17135	6874	Klebsiella oxytoca	0.75	Klebsiella oxytoca SA2
57821	4	21728	7810	Comamonas testosteroni	1	Comamonas testosteroni KF-1
57837	4	28049	11281	Ralstonia eutropha	0.25	Ralstonia sp. GA3-3
57840	4	8187	2761	Porphyromonas canoris	0.5	Porphyromonas canoris COT-108_OH1224
57851	4	21444	8631	Pseudomonas chloritidismutans	0.5	Pseudomonas xanthomarina S11
57866	4	9021	3264	Selenomonas artemidis	0.5	Selenomonas artemidis F0399
57892	4	11544	5109	Acinetobacter oleivorans	0.5	Acinetobacter oleivorans CIP 110421
57917	4	31014	5779	Dickeya dadantii	1	Dickeya dadantii 3937
57925	4	24722	12551	Streptomyces virginiae	0.25	Streptomyces sp. NRRL S-575
57975	4	13199	4836	Paracoccus sp.	1	Paracoccus sp. 5503
57995	4	34323	13495	Nocardia brasiliensis	0.75	Nocardia brasiliensis NBRC 14402
58016	4	13399	4747	Acinetobacter baumannii	0.25	Acinetobacter sp. NIPH 2171
58022	4	6327	2720	Streptococcus salivarius	0.75	Streptococcus salivarius
58024	4	8427	3205	Streptococcus salivarius	0.25	Streptococcus sp. HSISS3
58075	4	9626	4080	Prevotella melaninogenica	0.75	Prevotella melaninogenica ATCC 25845
58088	4	14251	5968	Lysinibacillus fusiformis	0.75	Lysinibacillus sp. A1
58091	4	19776	7711	Serratia fonticola	1	Serratia fonticola AU-AP2C
58127	4	4863	1706	Gardnerella vaginalis	1	Gardnerella vaginalis AMD
58146	4	7357	3038	Capnocytophaga cynodegmi	1	Capnocytophaga cynodegmi DSM 19736
58160	4	3507	958	Borrelia hermsii	1	Borrelia hermsii MTW
58189	4	11296	4111	Neisseria sicca	0.5	Neisseria sicca ATCC 29256
58192	4	5277	1981	Helicobacter pylori	1	Helicobacter pylori
58199	4	15261	5289	Vibrio fischeri	0.75	Aliivibrio fischeri ZF-211
58201	4	5328	1985	Helicobacter pylori	1	Helicobacter pylori SA157A
58223	4	7639	2924	Streptococcus anginosus	1	Streptococcus anginosus C1051
58235	4	10873	4223	Prevotella timonensis	1	Prevotella timonensis 4401737 = DSM 22865 = JCM 15640
58238	4	15671	6471	Clostridium scindens	0.5	Clostridiales bacterium VE202-26
58245	4	21638	7855	Rhodococcus ruber	0.75	Rhodococcus ruber
58248	4	26563	10172	Mesorhizobium australicum	0.25	Mesorhizobium sp. LNHC229A00
58249	4	27182	9686	Streptomyces griseorubens	0.25	Streptomyces sp. FxanaD5
58255	4	24618	8997	Micromonospora aurantiaca	0.25	Micromonospora globosa
58256	4	12024	4546	Dehalobacter sp.	1	Dehalobacter sp. CF
58257	4	7646	3110	Bifidobacterium catenulatum	0.5	Bifidobacterium catenulatum DSM 16992 = JCM 1194
58266	4	19332	7034	Salmonella enterica	1	Salmonella enterica subsp. houtenae serovar 50:g,z51:- str. 01-0133
58291	4	9363	2828	Streptococcus suis	1	Streptococcus suis YS49
58292	4	7541	2595	Rickettsia felis	0.75	Rickettsia felis URRWXCal2
33519	3	2309	2298	Streptococcus sanguinis	1	Streptococcus sanguinis SK1059
33758	3	8261	8249	Streptomyces ruber	0.666667	Streptomyces ruber
34863	3	6753	6731	Streptomyces bikiniensis	1	Streptomyces bikiniensis
35052	3	9244	3229	Prochlorococcus sp.	1	Prochlorococcus sp. MIT 0701
42916	3	4953	4782	Azotobacter vinelandii	1	Azotobacter vinelandii CA6
42919	3	1838	1821	Streptococcus tigurinus	1	Streptococcus tigurinus 2425
43442	3	4895	4887	Serratia marcescens	1	Serratia marcescens H1q
43449	3	9892	5213	Citrobacter rodentium	1	Citrobacter rodentium ICC168
43739	3	4803	4678	Pectobacterium wasabiae	1	Pectobacterium wasabiae CFBP 3304
44152	3	2773	2769	Thioalkalivibrio sp.	1	Thioalkalivibrio sp. ALJ20
44548	3	4193	4133	Chryseobacterium sp.	1	Chryseobacterium sp. CF299
44734	3	2349	2305	Enterococcus columbae	1	Enterococcus columbae DSM 7374 = ATCC 51263 [PRJNA206361]
44736	3	2380	2305	Enterococcus cecorum	1	Enterococcus cecorum DSM 20682 = ATCC 43198 [PRJNA199185]
44749	3	8591	4115	Bacteroides massiliensis	1	Bacteroides massiliensis B84634 = Timone 84634 = DSM 17679 = JCM 13223
44753	3	4227	4099	Acinetobacter gerneri	1	Acinetobacter gerneri
45113	3	3703	3647	candidate division	0.666667	candidate division WWE1 bacterium JGI 0000039-G13
45140	3	7431	3868	Oligotropha carboxidovorans	1	Oligotropha carboxidovorans OM4
45301	3	875	872	Rickettsia typhi	1	Rickettsia typhi str. B9991CWPP
45653	3	3261	3102	Deinococcus radiodurans	1	Deinococcus radiodurans DSM 20539
46025	3	8508	4342	Halobacillus trueperi	0.333333	Halobacillus trueperi
46161	3	14269	5087	Leptospira interrogans	0.666667	Leptospira interrogans serovar Copenhageni str. Fiocruz LV3992
46310	3	6761	3486	Acinetobacter baylyi	0.666667	Acinetobacter baylyi TG19579
46621	3	1683	1657	Helicobacter pylori	1	Helicobacter pylori Hp P-4c
46797	3	3742	3589	Sulfobacillus acidophilus	1	Sulfobacillus acidophilus TPY
46804	3	8146	4162	Lachnoclostridium phytofermentans	1	Lachnoclostridium phytofermentans KNHs212
46852	3	7576	4234	Sphingomonas melonis	1	Sphingomonas melonis C3
47185	3	2294	2228	Corynebacterium sp.	1	Corynebacterium sp. KPL1855
47955	3	9615	9531	Amycolatopsis mediterranei	1	Amycolatopsis mediterranei RB
48366	3	1686	1669	Helicobacter pylori	1	Helicobacter pylori HP87tlpD
48523	3	22295	7807	Saccharopolyspora erythraea	1	Saccharopolyspora erythraea NRRL 2338 (Prj:17885)
49033	3	4640	2239	Ornithobacterium rhinotracheale	1	Ornithobacterium rhinotracheale ORT-UMN 88
49965	3	6444	2137	Prevotella micans	1	Prevotella micans DSM 21469
49991	3	1994	1981	Prochlorococcus marinus	1	Prochlorococcus marinus str. MIT 9116
50249	3	8843	3139	Paenibacillus darwinianus	1	Paenibacillus darwinianus
50461	3	5907	2820	Lactobacillus casei	0.666667	Lactobacillus casei subsp. casei ATCC 393
50480	3	2865	2836	Listeria ivanovii	1	Listeria ivanovii subsp. ivanovii WSLC 3010
50528	3	3088	2933	Psychrobacter sp.	1	Psychrobacter sp. AC24
50659	3	11616	4012	Jejuia pallidilutea	1	Jejuia pallidilutea JCM 19301
50740	3	1962	1958	Prochlorococcus marinus	1	Prochlorococcus marinus str. MIT 9401
51108	3	5230	1989	Lactobacillus jensenii	1	Lactobacillus jensenii 269-3
51394	3	1664	1625	Helicobacter pylori	1	Helicobacter pylori NQ392
51654	3	5783	2930	Synechococcus elongatus	0.666667	Synechococcus elongatus PCC 7942
51812	3	9795	5027	Pseudomonas plecoglossicida	1	Pseudomonas plecoglossicida NBRC 103162 = DSM 15088
51925	3	6128	2283	Leuconostoc pseudomesenteroides	1	Leuconostoc pseudomesenteroides PS12
52123	3	14148	5396	Paenibacillus larvae	1	Paenibacillus larvae subsp. larvae B-3650
52177	3	6109	3459	Enterococcus durans	1	Enterococcus durans ATCC 6056 [PRJNA206364]
52598	3	5964	2103	Bartonella vinsonii	1	Bartonella vinsonii subsp. berkhoffii ATCC 51672
52720	3	20493	8039	Streptomyces gancidicus	0.333333	Streptomyces gancidicus BKS 13-15
52776	3	7305	2773	Lachnobacterium bovis	1	Lachnobacterium bovis C6A12
52778	3	4309	2280	Thermotoga elfii	0.666667	Thermotoga elfii DSM 9442
52874	3	8322	3103	Parachlamydia acanthamoebae	1	Parachlamydia acanthamoebae UV-7
52877	3	12992	7261	Clostridium methoxybenzovorans	0.333333	Clostridium indolis DSM 755
52935	3	2049	1089	Chlamydia psittaci	0.666667	Chlamydia psittaci 10_881_SC42
52961	3	2924	1536	Lactobacillus jensenii	1	Lactobacillus jensenii 27-2-CHN
53076	3	18848	7586	Pseudomonas putida	1	Pseudomonas putida H8234
53143	3	8473	4658	Clostridium autoethanogenum	0.666667	Clostridium autoethanogenum DSM 10061
53184	3	3345	1667	Helicobacter pylori	1	Helicobacter pylori NQ1671
53289	3	5844	2201	Thermotoga neapolitana	0.666667	Thermotoga neapolitana DSM 4359
53372	3	31630	9175	Streptomyces lividans	0.666667	Streptomyces lividans 1326
53521	3	8358	3668	Staphylococcus pseudintermedius	1	Staphylococcus pseudintermedius K7
53536	3	12610	5045	Providencia stuartii	1	Providencia stuartii ATCC 25827
53539	3	11815	4490	Bacillaceae bacterium	0.666667	Bacillaceae bacterium MTCC 8252
53632	3	24336	9655	Burkholderia mimosarum	1	Burkholderia mimosarum NBRC 106338
53785	3	11061	4292	Geobacillus thermodenitrificans	0.666667	Geobacillus thermodenitrificans NG80-2
53803	3	16858	8081	Burkholderia glumae	1	Burkholderia glumae BGR1
53913	3	6919	2945	Tetragenococcus muriaticus	1	Tetragenococcus muriaticus PMC-11-5
53954	3	5853	2065	Bartonella elizabethae	1	Bartonella elizabethae F9251
53994	3	12378	5205	Thauera aminoaromatica	0.333333	Thauera sp. SWB20
54024	3	16709	5979	Pseudomonas simiae	0.333333	Pseudomonas simiae
54241	3	10630	4559	Carnobacterium maltaromaticum	1	Carnobacterium maltaromaticum LMA28
54284	3	15937	6042	Nocardiopsis alba	0.666667	Nocardiopsis sp. TP-A0876
54338	3	20083	8573	Burkholderia vietnamiensis	0.333333	Burkholderia sp. WP42
54432	3	8026	2998	candidate division	1	candidate division KSB1 bacterium SCGC AAA252-E13
54464	3	6041	2407	Kandleria vitulina	1	Kandleria vitulina WCE2011
54491	3	14943	6343	Citrobacter amalonaticus	0.333333	Citrobacter sp. JT3
54555	3	6685	2545	Streptococcus anginosus	1	Streptococcus anginosus C238
54643	3	13391	5117	Pantoea agglomerans	0.333333	Pantoea sp. aB
54689	3	8305	3355	Staphylococcus equorum	0.666667	Staphylococcus equorum subsp. equorum Mu2
54715	3	4813	1731	Jonquetella anthropi	0.666667	Jonquetella sp. BV3C21
54811	3	24710	11524	Mycobacterium xenopi	1	Mycobacterium xenopi 4042
54853	3	19828	8265	Methylobacterium radiotolerans	0.333333	Methylobacterium radiotolerans JCM 2831
54866	3	13817	5219	Enterovibrio norvegicus	1	Enterovibrio norvegicus FF-162
54867	3	7606	4852	Oscillospiraceae bacterium	0.333333	Oscillibacter sp. KLE 1728
54882	3	14688	5490	Rhodococcus equi	1	Rhodococcus equi NBRC 101255 = C 7
54920	3	9108	3348	Meiothermus ruber	1	Meiothermus ruber DSM 1279
54926	3	17643	6669	Mycobacterium sp.	1	Mycobacterium sp. MCS
54935	3	13971	5520	Pectobacterium wasabiae	0.666667	Pectobacterium wasabiae WPP163
54961	3	14713	5641	Rahnella aquatilis	1	Rahnella aquatilis OV588
55004	3	5653	2239	Peptostreptococcus anaerobius	1	Peptostreptococcus anaerobius DSM 2949
55030	3	16008	7201	Photorhabdus temperata	1	Photorhabdus temperata subsp. temperata M1021
55051	3	4443	2516	Arcobacter sp.	1	Arcobacter sp. AF1440
55060	3	22898	8834	Paenibacillus mucilaginosus	1	Paenibacillus mucilaginosus 3016
55142	3	8719	3694	Anoxybacillus kamchatkensis	0.333333	Anoxybacillus gonensis G2
55158	3	10112	3832	Cellulophaga lytica	0.666667	Cellulophaga lytica DSM 7489
55166	3	19201	8121	Streptomyces sp.	1	Streptomyces sp. CNR698
55181	3	4797	1915	Parascardovia denticolens	1	Parascardovia denticolens DSM 10105 = JCM 12538
55187	3	20256	9020	Burkholderia phenoliruptrix	0.333333	Burkholderia sp. JPY366
55197	3	13227	5749	Salinivibrio sp.	1	Salinivibrio sp. S34
55351	3	13259	5210	Salmonella bongori	1	Salmonella bongori NCTC 12419
55368	3	13884	5178	Xanthomonas vesicatoria	1	Xanthomonas vesicatoria 53M
55476	3	6790	3997	Fusobacterium ulcerans	1	Fusobacterium ulcerans 12-1B
55515	3	21451	8790	Clostridium hathewayi	0.333333	Clostridiales bacterium VE202-04
55523	3	8859	3429	Exiguobacterium aurantiacum	0.333333	Exiguobacterium sp. ZOR0005
55553	3	5749	2450	Lactobacillus gasseri	1	Lactobacillus gasseri JV-V03
55555	3	2014	1055	Ehrlichia ruminantium	1	Ehrlichia ruminantium str. Welgevonden
55557	3	14570	7302	Bacteroides nordii	0.666667	Bacteroides nordii JCM 12987
55622	3	5012	2584	Thioalkalivibrio sp.	1	Thioalkalivibrio sp. ALD1
55634	3	14996	5828	Enterovibrio calviensis	1	Enterovibrio calviensis 1F-211
55674	3	6218	2715	Lactobacillus amylovorus	0.666667	Lactobacillus amylovorus GRL1118
55786	3	9942	3823	Legionella pneumophila	1	Legionella pneumophila subsp. fraseri
55794	3	13984	6274	Methylibium petroleiphilum	0.333333	Methylibium sp. T29-B
55854	3	19549	8700	Streptomyces sp.	1	Streptomyces sp. SA3_actG
55881	3	14917	6514	Methylobacter marinus	0.333333	Methylobacter marinus A45
55970	3	10465	4050	Pseudomonas tuomuerensis	0.333333	Pseudomonas tuomuerensis JCM 14085
55977	3	10559	5647	Mycobacterium neoaurum	0.666667	Mycobacterium neoaurum ATCC 25795
55978	3	15160	5840	Rahnella aquatilis	0.333333	Rahnella sp. Y9602
56058	3	8039	3534	Prevotella buccae	0.666667	Prevotella sp. MSX73
56060	3	14008	5931	Gordonia alkanivorans	1	Gordonia alkanivorans CGMCC 6845
56130	3	11236	6223	Blautia wexlerae	0.666667	Blautia wexlerae DSM 19850
56206	3	9580	3814	Acinetobacter soli	1	Acinetobacter soli NIPH 2899
56228	3	11145	4376	Microbacterium maritypicum	0.333333	Microbacterium sp. Cr-K29
56239	3	12055	5579	Roseburia intestinalis	1	Roseburia intestinalis M50/1
56253	3	16769	6872	Gordonia polyisoprenivorans	1	Gordonia polyisoprenivorans HW436
56301	3	8206	4572	Acinetobacter gyllenbergii	1	Acinetobacter gyllenbergii MTCC 11365
56310	3	8892	3521	Listeria innocua	1	Listeria innocua ATCC 33091
56315	3	11899	7351	Blautia producta	0.666667	Blautia producta ATCC 27340
56340	3	12362	4671	Stenotrophomonas maltophilia	0.666667	Stenotrophomonas maltophilia 5BA-I-2
56346	3	10474	5531	Dorea formicigenerans	0.666667	Dorea formicigenerans 4_6_53AFAA
56366	3	11080	4539	Rhodanobacter sp.	1	Rhodanobacter sp. OR92
56379	3	14073	6497	Agrobacterium tumefaciens	0.333333	Agrobacterium sp. 10MFCol1.1
56428	3	6861	2823	Capnocytophaga canimorsus	1	Capnocytophaga canimorsus Cc11
56471	3	7778	3634	Prevotella disiens	1	Prevotella disiens DNF00882
56472	3	8341	3772	Caldicellulosiruptor acetigenus	0.333333	Caldicellulosiruptor lactoaceticus 6A
56488	3	14611	6171	Glaciecola agarilytica	0.333333	Glaciecola agarilytica NO2
56532	3	5858	2556	Propionimicrobium lymphophilum	0.666667	Propionimicrobium sp. BV2F7
56534	3	7389	3239	Thermoanaerobacter italicus	0.333333	Thermoanaerobacter mathranii subsp. mathranii str. A3
56560	3	6580	2792	Candidatus Protochlamydia	1	Candidatus Protochlamydia amoebophila EI2
56566	3	10532	4042	Vibrio cholerae	1	Vibrio cholerae O1 str. 87395
56594	3	10335	4588	Nonlabens ulvanivorans	1	Nonlabens ulvanivorans
56602	3	9440	5308	Vibrio natriegens	0.666667	Vibrio natriegens NBRC 15636 = ATCC 14048 = DSM 759
56634	3	20154	8542	Mesorhizobium ciceri	0.666667	Mesorhizobium ciceri biovar biserrulae WSM1271
56652	3	5252	2813	Thioalkalivibrio thiocyanoxidans	0.333333	Thioalkalivibrio thiocyanoxidans ARh2
56661	3	8684	3709	Prevotella baroniae	1	Prevotella baroniae JCM 13447
56694	3	4588	1770	Taylorella asinigenitalis	1	Taylorella asinigenitalis ATCC 700933
56706	3	7850	3563	Prevotella nigrescens	1	Prevotella nigrescens ATCC 33563
56709	3	11778	5087	Gluconacetobacter europaeus	1	Gluconacetobacter europaeus 5P3
56723	3	13751	6913	Sphingobium quisquiliarum	0.333333	Sphingobium quisquiliarum P25
56737	3	9847	3714	Desulfovibrio vulgaris	1	Desulfovibrio vulgaris RCH1
56740	3	12548	5319	Pseudoalteromonas agarivorans	0.333333	Pseudoalteromonas agarivorans S816
56755	3	21669	9126	Streptomyces fulvissimus	0.333333	Streptomyces alboviridis
56771	3	8315	3748	Lactobacillus coryniformis	1	Lactobacillus coryniformis subsp. coryniformis KCTC 3167
56776	3	14236	6038	Citrobacter freundii	0.666667	Citrobacter freundii UCI 32
56779	3	6496	2664	Megasphaera elsdenii	1	Megasphaera elsdenii T81
56783	3	6574	2989	Porphyromonas cangingivalis	1	Porphyromonas cangingivalis COT-109_OH1379
56803	3	9711	4151	Butyrivibrio hungatei	0.333333	Butyrivibrio sp. AE3003
56831	3	16747	6619	Parabacteroides goldsteinii	0.666667	Parabacteroides sp. ASF519
56832	3	7896	4265	Luteibacter sp.	1	Luteibacter sp. 9143
56858	3	18839	7786	Pseudomonas sp.	1	Pseudomonas sp. AAC
56869	3	11367	5861	Acidithiobacillus thiooxidans	1	Acidithiobacillus thiooxidans A01
56914	3	13745	5451	Escherichia fergusonii	1	Escherichia fergusonii ECD227
56919	3	7846	3003	Staphylococcus xylosus	1	Staphylococcus xylosus
56927	3	9725	4844	Eubacterium rectale	1	Eubacterium rectale DSM 17629
56932	3	15699	7189	Vibrio alginolyticus	0.333333	Vibrio sp. JCM 18905
56934	3	19233	7582	Paenibacillus sp.	1	Paenibacillus sp. FSL H8-457
56970	3	6749	2767	Lachnospiraceae bacterium	1	Lachnospiraceae bacterium AC2012
56972	3	11670	5318	Parabacteroides merdae	1	Parabacteroides merdae ATCC 43184
56978	3	14684	6362	Vibrio rotiferianus	1	Vibrio rotiferianus DAT722
56983	3	7955	3576	Lactobacillus hilgardii	0.333333	Lactobacillus buchneri ATCC 11577
56987	3	11122	4456	Erwinia pyrifoliae	0.666667	Erwinia pyrifoliae DSM 12163
57038	3	7780	3007	Methylophilaceae bacterium	0.333333	Methylotenera sp. 1P/1
57045	3	3524	2079	Fusobacterium gonidiaformans	1	Fusobacterium gonidiaformans 3-1-5R
57083	3	12304	4725	Stenotrophomonas maltophilia	0.666667	Stenotrophomonas maltophilia B418
57096	3	10843	4784	Clostridium botulinum	1	Clostridium botulinum B str. Eklund 17B
57114	3	7410	3558	Megamonas hypermegale	0.333333	Megamonas funiformis YIT 11815
57116	3	22078	11082	Mycobacterium setense	0.666667	Mycobacterium setense DSM 45070
57145	3	6887	2876	Candidatus Glomeribacter	0.333333	Candidatus Glomeribacter endosymbiont of Mortierella elongata strain AG77
57156	3	5861	3334	Acinetobacter indicus	0.666667	Acinetobacter indicus CIP 110367
57186	3	11082	4368	Vibrio breoganii	1	Vibrio breoganii ZF-29
57190	3	7786	2948	Thioalkalivibrio sp.	1	Thioalkalivibrio sp. ALJ6
57195	3	5861	2401	Lactobacillus sakei	1	Lactobacillus sakei subsp. sakei JCM 1157
57209	3	5121	2974	Prevotella oralis	1	Prevotella oralis ATCC 33269
57214	3	9387	5362	Enterobacter asburiae	0.333333	Enterobacter sp. DC3
57350	3	1739	905	Borrelia miyamotoi	1	Borrelia miyamotoi CT14D4
57360	3	9989	4056	Plesiomonas shigelloides	0.666667	Plesiomonas sp. ZOR0011
57364	3	12811	6047	Bilophila wadsworthia	0.666667	Bilophila wadsworthia ATCC 49260
57366	3	14785	6166	Shewanella haliotis	0.333333	Shewanella algae JCM 21037
57369	3	21393	9109	Mesorhizobium plurifarium	1	Mesorhizobium plurifarium
57380	3	7843	3660	Capnocytophaga canimorsus	1	Capnocytophaga canimorsus Cc11
57398	3	8918	3854	Prevotella maculosa	1	Prevotella maculosa DSM 19339
57420	3	14808	5708	Pseudomonas mendocina	1	Pseudomonas mendocina NBRC 14162
57441	3	21733	10910	Streptomyces sp.	1	Streptomyces sp. CcalMP-8W
57489	3	9943	5901	Rhizobium sp.	1	Rhizobium sp. R1-200B2
57493	3	7698	2843	Neisseria meningitidis	1	Neisseria meningitidis alpha704
57495	3	10924	4544	Acinetobacter sp.	1	Acinetobacter sp. NIPH 758
57543	3	19084	8668	Cupriavidus metallidurans	0.333333	Cupriavidus sp. SHE
57556	3	6732	3408	Lactobacillus mucosae	1	Lactobacillus mucosae DPC 6426
57598	3	8119	4600	Aeromonas media	1	Aeromonas media
57605	3	23001	10199	Bradyrhizobium yuanmingense	1	Bradyrhizobium yuanmingense CCBAU 25021
57615	3	4508	1810	Dehalococcoides mccartyi	0.666667	Dehalococcoides mccartyi GY50
57618	3	9889	6037	Salinispora pacifica	1	Salinispora pacifica DSM 45549
57626	3	9745	4058	Acinetobacter venetianus	0.333333	Acinetobacter sp. NBRC 100985
57633	3	4753	2797	Prevotella intermedia	1	Prevotella intermedia ATCC 25611
57634	3	7578	3562	Eubacterium siraeum	1	Eubacterium siraeum DSM 15702
57641	3	13148	5708	Shewanella xiamenensis	0.333333	Shewanella sp. POL2
57642	3	11995	4769	Phaeobacter gallaeciensis	0.666667	Phaeobacter inhibens DSM 16374
57661	3	5665	2352	Propionibacterium granulosum	0.666667	Propionibacterium granulosum DSM 20700
57665	3	3759	3700	Candidatus Liberibacter	0.666667	Candidatus Liberibacter americanus str. Sao Paulo
57667	3	1727	890	Borrelia parkeri	0.666667	Borrelia parkeri HR1
57668	3	11320	4873	Acinetobacter baumannii	0.333333	Acinetobacter sp. GG2
57694	3	24208	12191	Amycolatopsis thermoflava	0.333333	Amycolatopsis thermoflava N1165
57709	3	4942	2064	Bifidobacterium pseudolongum	1	Bifidobacterium pseudolongum PV8-2
57711	3	14053	6074	Ochrobactrum anthropi	0.666667	Ochrobactrum anthropi CTS-325
57716	3	16696	7070	Paenibacillus massiliensis	0.666667	Paenibacillus massiliensis T7
57726	3	6205	3500	Pseudoxanthomonas suwonensis	1	Pseudoxanthomonas suwonensis J47
57754	3	5767	2262	Bifidobacterium pseudocatenulatum	1	Bifidobacterium pseudocatenulatum DSM 20438 = JCM 1200
57781	3	22266	11106	Rhizobium sp.	1	Rhizobium sp. OV201
57785	3	6832	2931	Micrococcus luteus	0.666667	Burkholderia sp. 2385
57786	3	17764	7506	Paenibacillus alvei	0.666667	Paenibacillus sp. UNC217MF
57810	3	4860	2239	Prochlorococcus sp.	1	Prochlorococcus sp. scB245a_519O21
57812	3	6702	2750	Prochlorococcus marinus	1	Prochlorococcus marinus str. NATL1A
57820	3	8121	3719	Clostridium botulinum	0.666667	Clostridium botulinum C str. Eklund
57830	3	12454	5134	Xanthomonas campestris	0.666667	Xanthomonas campestris pv. cannabis NCPPB 2877
57831	3	7832	3327	Prevotella veroralis	1	Prevotella veroralis DSM 19559
57852	3	17910	8067	Pseudomonas sp.	1	Pseudomonas sp. GM102
57878	3	11356	5248	Xanthomonas translucens	1	Xanthomonas translucens pv. translucens DSM 18974
57911	3	10257	6460	Ralstonia pickettii	0.333333	Ralstonia sp. 5_2_56FAA
57915	3	9653	5943	Salinispora pacifica	1	Salinispora pacifica CNT148
57920	3	18323	8793	Nocardiopsis dassonvillei	0.333333	Nocardiopsis dassonvillei subsp. dassonvillei DSM 43111
57943	3	18181	7665	Paenibacillus sp.	1	Paenibacillus sp. FSL R5-192
57950	3	6193	2507	Mannheimia varigena	1	Mannheimia varigena USDA-ARS-USMARC-1388
57958	3	4649	2006	Parvimonas micra	1	Parvimonas micra ATCC 33270
57961	3	21409	10304	Paenibacillus sp.	1	Paenibacillus sp. IHB B 3415
57965	3	25155	11082	Amycolatopsis orientalis	0.333333	Amycolatopsis sp. MJM2582
58013	3	5209	2467	gamma proteobacterium	1	gamma proteobacterium SCGC AAA076-F14
58026	3	16230	8414	Bacillus mojavensis	0.666667	Bacillus mojavensis RO-H-1 [PRJNA227789]
58027	3	7381	3217	Neisseria lactamica	1	Neisseria lactamica Y92-1009
58029	3	8502	3289	Avibacterium paragallinarum	1	Avibacterium paragallinarum JF4211
58030	3	5268	2365	Campylobacter upsaliensis	1	Campylobacter upsaliensis JV21
58049	3	11551	6144	Sphingomonas sp.	1	Sphingomonas sp. Ant20
58068	3	11083	6602	Williamsia sp.	0.333333	Kitasatospora arboriphila
58073	3	20428	10034	Azospirillum brasilense	1	Azospirillum brasilense Sp245
58092	3	13452	5284	Pseudomonas fulva	0.333333	Pseudomonas sp. URMO17WK12:I4
58094	3	20183	9479	Mesorhizobium opportunistum	0.333333	Mesorhizobium sp. LNHC232B00
58098	3	5153	1983	Helicobacter pylori	1	Helicobacter pylori B128
58100	3	13411	5796	Enterobacteriaceae bacterium	0.333333	Hafnia paralvei GTA-HAF03
58111	3	11898	5222	Desulfovibrio africanus	1	Desulfovibrio africanus str. Walvis Bay
58115	3	4571	1807	Campylobacter lari	1	Campylobacter lari RM16701
58119	3	30121	14333	Burkholderia terrae	0.666667	Burkholderia terrae BS001
58122	3	12400	5688	Alcaligenes faecalis	0.666667	Alcaligenes faecalis MOR02
58126	3	5901	2504	Streptococcus parasanguinis	1	Streptococcus parasanguinis F0449
58135	3	7388	3108	Prevotella buccalis	0.666667	Prevotella buccalis DNF00985
58137	3	11879	4984	Bacillus pumilus	1	Bacillus pumilus ATCC 7061
58143	3	6691	2568	Aggregatibacter aphrophilus	1	Aggregatibacter aphrophilus F0387
58147	3	26264	11514	Burkholderia xenovorans	0.666667	Burkholderia xenovorans
58152	3	5484	3096	Methylophilus sp.	1	Methylophilus sp. 42
58162	3	15799	8180	Sphingobium yanoikuyae	0.666667	alpha proteobacterium LLX12A
58166	3	13673	6363	Methylobacter tundripaludum	1	Methylobacter tundripaludum 21/22
58177	3	13110	5564	Aeromonas bestiarum	0.333333	Aeromonas salmonicida CBA100
58182	3	14902	6360	Acidovorax avenae	0.666667	Acidovorax avenae subsp. avenae RS-1
58207	3	17616	7328	Paenibacillus chitinolyticus	0.333333	Paenibacillus sp. HGH0039
58227	3	5458	3247	Idiomarina loihiensis	0.666667	Idiomarina loihiensis L2TR
58228	3	5975	2337	Streptococcus suis	1	Streptococcus suis S428
58252	3	21668	12156	Streptomyces erythrochromogenes	0.333333	Streptomyces erythrochromogenes
58259	3	19099	9375	Vibrio sp.	1	Vibrio sp. JCM 19232 JCM19232
58260	3	10395	4969	Listeria fleischmannii	0.666667	Listeriaceae bacterium TTU M1-001
58273	3	12378	5851	Arthrobacter sp.	1	Arthrobacter sp. 131MFCol6.1
58278	3	12084	4752	Aeromonas jandaei	0.666667	Aeromonas jandaei Riv2
58281	3	5474	2218	Mobiluncus curtisii	1	Mobiluncus curtisii subsp. holmesii ATCC 35242
58294	3	5787	2814	Streptococcus infantarius	0.666667	Streptococcus infantarius subsp. infantarius ATCC BAA-102
33246	2	2892	2813	Treponema denticola	1	Treponema denticola SP33
33253	2	5121	5090	Acidovorax radicis	1	Acidovorax radicis N35
33432	2	3814	3798	Rubrivivax benzoatilyticus	1	Rubrivivax benzoatilyticus JA2 = ATCC BAA-35
33466	2	5979	5915	Clostridium saccharoperbutylacetonicum	1	Clostridium saccharoperbutylacetonicum N1-4(HMT)
33551	2	3778	3687	Myroides odoratimimus	0.5	Myroides odoratus DSM 2801
33637	2	3048	3045	Mycetocola saprophilus	1	Mycetocola saprophilus
33650	2	2942	2905	Rhodothermus marinus	1	Rhodothermus marinus SG0.5JP17-172
33710	2	1201	1198	cyanobacterium UCYN-A	0.5	Candidatus Atelocyanobacterium thalassa isolate ALOHA
33712	2	9315	5949	Paraprevotella clara	0.5	Paraprevotella clara YIT 11840
33739	2	12131	6601	Streptomyces novaecaesareae	0.5	Streptomyces pyridomyceticus
33744	2	4220	4191	Vibrio orientalis	1	Vibrio orientalis CIP 102891 = ATCC 33934
33751	2	7362	7356	Streptomyces varsoviensis	1	Streptomyces varsoviensis
33757	2	8170	8161	Streptomyces aureocirculatus	1	Streptomyces aureocirculatus
33759	2	13153	6741	Streptomyces griseus	1	Streptomyces griseus subsp. griseus
33824	2	8618	8606	Streptomyces bicolor	1	Streptomyces bicolor
33896	2	1918	1908	Hydrogenobacter thermophilus	1	Hydrogenobacter thermophilus TK-6 (Prj:41547)
33897	2	15185	8226	Burkholderia glathei	1	Burkholderia glathei
33915	2	4502	4405	Clostridium cellulovorans	1	Clostridium cellulovorans 743B (Prj:52819)
34096	2	3159	1611	Bifidobacterium gallicum	1	Bifidobacterium gallicum DSM 20093 = LMG 11596
34097	2	2583	2539	Corynebacterium doosanense	1	Corynebacterium doosanense DSM 45436
34109	2	1777	1770	Porphyromonas endodontalis	0.5	Propionibacterium acidifaciens F0233
34136	2	5079	2567	Corynebacterium aurimucosum	1	Corynebacterium aurimucosum ATCC 700975 (Prj:31451)
34140	2	9369	9272	Bradyrhizobium genosp.	0.5	Bradyrhizobium sp. USDA 3384
34147	2	1624	1611	Helicobacter canadensis	1	Helicobacter canadensis MIT 98-5491
34175	2	1998	1988	Lactobacillus reuteri	1	Lactobacillus reuteri SD2112
34390	2	14961	7972	Streptomyces clavuligerus	1	Streptomyces clavuligerus ATCC 27064 (Prj:64411)
34394	2	5159	5051	Cyanothece sp.	1	Cyanothece sp. ATCC 51472
34403	2	3909	3830	Clostridium kluyveri	1	Clostridium kluyveri DSM 555
34405	2	7094	7087	Nocardia rhamnosiphila	1	Nocardia rhamnosiphila
34447	2	6933	3576	Bordetella avium	1	Bordetella avium Nh1210
34567	2	3881	3859	Leptospira biflexa	1	Leptospira biflexa serovar Patoc strain 'Patoc 1 (Ames)'
34594	2	5866	3010	Dokdonia donghaensis	0.5	Dokdonia donghaensis MED134
34604	2	8004	4102	Yersinia rohdei	1	Yersinia rohdei ATCC 43380
34614	2	1784	1720	Thermodesulfobacterium commune	1	Thermodesulfobacterium commune DSM 2178
34823	2	13145	6811	Oscillatoria formosa	0.5	Oscillatoria sp. PCC 6506
34835	2	5887	3123	Acidithiobacillus ferrooxidans	1	Acidithiobacillus ferrooxidans ATCC 23270
34848	2	9040	8865	Hyalangium minutum	0.5	Hyalangium minutum
34852	2	7709	7536	Kitasatospora setae	1	Kitasatospora setae
34857	2	5698	2895	Corynebacterium efficiens	1	Corynebacterium efficiens YS-314 (Prj:34585)
34861	2	3765	3724	Caulobacter crescentus	1	Caulobacter crescentus CB15
34866	2	7770	7739	Streptomyces anulatus	1	Streptomyces anulatus
35018	2	1985	1981	Prochlorococcus marinus	1	Prochlorococcus marinus str. MIT 9311
35035	2	4717	4311	Sulfuricurvum sp.	0.5	Sulfuricurvum sp. PC08-66
35036	2	3955	3938	Alteromonas sp.	1	Alteromonas sp. LTR
35039	2	4793	4711	Serratia sp.	1	Serratia sp. Ag2
35045	2	2170	2136	bacterium OL-1	1	bacterium OL-1
35048	2	3474	3431	Clostridium sp.	1	Clostridium sp. LF2
35049	2	3866	3657	Bacillus sp.	1	Bacillus sp. KW-12
35050	2	3811	3760	Clostridium sp.	1	Clostridium sp. CL-2
35053	2	2004	1999	Prochlorococcus sp.	1	Prochlorococcus sp. MIT 0603
35076	2	2502	2398	Haemophilus sp.	1	Haemophilus sp. FF7
35124	2	8294	4334	Yersinia kristensenii	0.5	Yersinia frederiksenii Y225
35127	2	3747	3745	Microbacterium sp.	1	Microbacterium sp. Cr-K20
35677	2	5001	4928	Serratia fonticola	1	Serratia fonticola RB-25
35924	2	2225	2211	Bifidobacterium cuniculi	1	Bifidobacterium cuniculi
35926	2	1588	1584	Bifidobacterium pseudolongum	1	Bifidobacterium pseudolongum subsp. pseudolongum DSM 20099
37016	2	2614	2606	Staphylococcus aureus	1	Staphylococcus aureus M21126
37296	2	4893	4731	Bacillus sp.	1	Bacillus sp. JCA
38038	2	1896	1890	Bifidobacterium merycicum	1	Bifidobacterium merycicum DSM 6492
38039	2	1824	1817	Bifidobacterium boum	1	Bifidobacterium boum DSM 20432
38040	2	3043	3006	Bacteroides sp.	1	Bacteroides sp. Ga6A1
38375	2	1697	1648	Helicobacter pylori	1	Helicobacter pylori BM012A
38755	2	2316	2287	Bacteroidales bacterium	0.5	Bacteroides sp. CF50
38756	2	4443	4425	Enterobacter cloacae	1	Enterobacter cloacae JD6301
38957	2	6483	6463	Labrenzia sp.	1	Labrenzia sp. C1B10
38958	2	5523	5493	Serratia sp.	1	Serratia sp. H1n
38961	2	6804	6784	Paenibacillus sp.	1	Paenibacillus sp. MAEPY2
39834	2	6217	3386	Asaia platycodi	0.5	Asaia platycodi SF2.1
39857	2	4802	2438	Arcobacter sp.	1	Arcobacter sp. AF1028
39970	2	1610	1596	Helicobacter pylori	1	Helicobacter pylori SA213C
39977	2	3328	1749	Helicobacter pylori	1	Helicobacter pylori SA46A
39978	2	3135	1621	Helicobacter pylori	1	Helicobacter pylori SA37C
40026	2	2927	2922	Microbacterium sp.	1	Microbacterium sp. UNC423CL45Tsu
40054	2	12895	6743	Paenibacillus graminis	1	Paenibacillus graminis RSA19
42727	2	7536	7492	Bradyrhizobium japonicum	1	Bradyrhizobium japonicum is5
42741	2	3475	3465	Sulfitobacter donghicola	1	Sulfitobacter donghicola DSW-25 = KCTC 12864 = JCM 14565
42861	2	6314	3268	Deinococcus wulumuqiensis	0.5	Deinococcus wulumuqiensis R12
42917	2	3821	3816	Saccharopolyspora rectivirgula	1	Saccharopolyspora rectivirgula
43067	2	3573	3559	Hyphomonas neptunium	0.5	Hyphomonas neptunium ATCC 15444
43088	2	5088	5080	Mycobacterium sp.	1	Mycobacterium sp. VKM Ac-1816D
43116	2	3695	3682	Aeromonas diversa	1	Aeromonas diversa CECT 4254
43207	2	4130	3950	Clostridium pasteurianum	1	Clostridium pasteurianum DSM 525 = ATCC 6013
43220	2	3836	3811	Providencia alcalifaciens	1	Providencia alcalifaciens PAL-1
43321	2	4610	4582	Kosakonia sacchari	0.5	Kosakonia sacchari SP1
43332	2	1460	1457	Lawsonia intracellularis	1	Lawsonia intracellularis N343
43336	2	14266	13755	Clostridiales bacterium	0.5	Clostridiales bacterium VE202-16
43337	2	2018	2015	Coriobacteriaceae bacterium	0.5	Collinsella sp. GD3
43368	2	6826	3704	Thalassobacter stenotrophicus	0.5	Thalassobacter stenotrophicus 1CONIMAR09
43452	2	10260	5839	Pseudomonas putida	0.5	Pseudomonas putida S13.1.2
43453	2	3763	3679	Acinetobacter sp.	1	Acinetobacter sp. CIP 64.2
43461	2	2986	2948	Acinetobacter brisouii	1	Acinetobacter brisouii CIP 110357
43467	2	3527	3523	Elizabethkingia meningoseptica	1	Elizabethkingia meningoseptica ATCC 13253 = NBRC 12535 [PRJNA205457]
43471	2	4451	4445	Pseudomonas parafulva	1	Pseudomonas parafulva NBRC 16636
43515	2	740	738	Candidatus Kinetoplastibacterium	1	Candidatus Kinetoplastibacterium blastocrithidii TCC012E
43534	2	7083	7068	Nocardia carnea	0.5	Nocardia carnea NBRC 14403
43897	2	4753	4720	Agrobacterium sp.	1	Agrobacterium sp. UNC420CL41Cvi
44054	2	4191	4134	Enterococcus gilvus	1	Enterococcus gilvus ATCC BAA-350 [PRJNA202709]
44055	2	3282	3270	Enterococcus caccae	1	Enterococcus caccae ATCC BAA-1240 [PRJNA202681]
44056	2	3574	3548	Enterococcus phoeniculicola	1	Enterococcus phoeniculicola ATCC BAA-412 [PRJNA206356]
44057	2	3339	3325	Enterococcus moraviensis	1	Enterococcus moraviensis ATCC BAA-383 [PRJNA202679]
44058	2	3236	3207	Enterococcus haemoperoxidus	1	Enterococcus haemoperoxidus ATCC BAA-382 [PRJNA206350]
44059	2	5287	5140	Enterococcus pallens	1	Enterococcus pallens ATCC BAA-351 [PRJNA206355]
44060	2	2432	2367	Enterococcus asini	1	Enterococcus asini ATCC 700915 [PRJNA202676]
44061	2	2902	2865	Enterococcus villorum	1	Enterococcus villorum ATCC 700913 [PRJNA202675]
44063	2	4287	4214	Enterococcus raffinosus	1	Enterococcus raffinosus ATCC 49464 [PRJNA206357]
44064	2	4541	4429	Enterococcus malodoratus	1	Enterococcus malodoratus ATCC 43197 [PRJNA202672]
44149	2	5669	2903	Thioalkalivibrio sp.	1	Thioalkalivibrio sp. ALE14
44295	2	6794	6781	Streptomyces sp.	1	Streptomyces sp. LaPpAH-95
44511	2	2674	2658	Bifidobacterium scardovii	1	Bifidobacterium scardovii
44522	2	1719	1701	Bifidobacterium asteroides	1	Bifidobacterium asteroides PRL2011
44545	2	1669	1629	Helicobacter pylori	1	Helicobacter pylori R018c
44556	2	2166	2164	Enterococcus sulfureus	1	Enterococcus sulfureus ATCC 49903 [PRJNA206272]
44557	2	4577	4421	Enterococcus avium	1	Enterococcus avium ATCC 14025 [PRJNA206270]
44559	2	2594	2565	Enterococcus saccharolyticus	1	Enterococcus saccharolyticus ATCC 43076 [PRJNA206268]
44631	2	3858	3421	alpha proteobacterium	1	alpha proteobacterium SCGC AB-629-G21
44712	2	2533	2486	Hydrogenovibrio marinus	1	Hydrogenovibrio marinus DSM 11271
44713	2	2178	2166	Thermotoga hypogea	1	Thermotoga hypogea NBRC 106472
44717	2	1894	1831	Streptococcus massiliensis	1	Streptococcus massiliensis 4401825
44718	2	5407	5215	Sporomusa ovata	1	Sporomusa ovata DSM 2662
44720	2	5669	2902	Prevotella paludivivens	1	Prevotella paludivivens DSM 17968
44721	2	4686	2421	Prevotella nanceiensis	1	Prevotella nanceiensis JCM 15639
44725	2	4244	4222	Pontibacillus marinus	1	Pontibacillus marinus DSM 16465
44726	2	3727	3718	Pontibacillus halophilus	1	Pontibacillus halophilus DSM 19796
44727	2	2331	2162	Pasteurella pneumotropica	1	Pasteurella pneumotropica
44728	2	4940	2595	Lysobacter defluvii	1	Lysobacter defluvii IMMIB APB-9 = DSM 18482
44729	2	4659	4597	Halomonas anticariensis	1	Halomonas anticariensis FP35 = DSM 16096
44730	2	2730	2719	Flavobacterium suncheonense	1	Flavobacterium suncheonense GH29-5 = DSM 17707
44731	2	4031	4020	Flavobacterium subsaxonicum	1	Flavobacterium subsaxonicum DSM 21790
44732	2	4001	3991	Flavobacterium rivuli	1	Flavobacterium rivuli WB 3.3-2 = DSM 21788
44737	2	3470	3436	Desulfovibrio gigas	1	Desulfovibrio gigas DSM 1382 = ATCC 19364
44741	2	3900	3878	Clostridium glycolicum	1	Clostridium glycolicum ATCC 14880
44746	2	2388	2364	Bifidobacterium subtile	1	Bifidobacterium subtile DSM 20096
44747	2	4579	2373	Bacteroides propionicifaciens	1	Bacteroides propionicifaciens JCM 14649
44750	2	2876	2876	Arenimonas oryziterrae	1	Arenimonas oryziterrae DSM 21050 = YC6267
44751	2	2839	2836	Arenimonas composti	1	Arenimonas composti DSM 18010
44752	2	1780	1771	Actinobaculum schaalii	1	Actinobaculum schaalii DSM 15541
44754	2	3372	3356	Acinetobacter bouvetii	1	Acinetobacter bouvetii DSM 14964 = CIP 107468 [PRJNA201594]
44756	2	4177	4147	Methylopila sp.	0.5	Methylopila sp. 73B
44757	2	3709	3690	bacterium MS4	1	bacterium MS4
44758	2	3945	3934	Rhodocyclaceae bacterium	0.5	Methyloversatilis sp. FAM1
44785	2	2434	2432	Methylotenera versatilis	0.5	Methylotenera sp. 73s
44807	2	6451	6442	Nocardia asteroides	0.5	Pilimelia anulata
44885	2	3452	1738	Bartonella doshiae	1	Bartonella doshiae ATCC 700133
44886	2	2853	2806	Thermoanaerobacterium aotearoense	0.5	Thermoanaerobacterium saccharolyticum JW/SL-YS485
45027	2	2623	2541	Psychrobacter sp.	1	Psychrobacter sp. TB2
45039	2	8763	8582	Streptacidiphilus albus	1	Streptacidiphilus albus NBRC 100918
45114	2	2950	2888	candidate division	1	candidate division OP8 bacterium SCGC AAA252-A02
45115	2	2469	2456	candidate division	1	candidate division NKB19 bacterium JGI 0000039-J10
45116	2	2119	1119	Chlamydia psittaci	0.5	Chlamydia psittaci 10_1398_11
45135	2	3900	3886	Rhodospirillum rubrum	1	Rhodospirillum rubrum F11
45137	2	3857	3796	Legionella massiliensis	1	Legionella massiliensis
45160	2	7015	3571	Edwardsiella ictaluri	1	Edwardsiella ictaluri ATCC 33202
45166	2	1148	1129	SAR406 cluster	1	SAR406 cluster bacterium SCGC AAA160-I06
45169	2	3803	3788	Leminorella grimontii	1	Leminorella grimontii ATCC 33999
45347	2	3830	3812	Methyloversatilis universalis	1	Methyloversatilis universalis FAM5
45411	2	2380	2356	Selenomonas sputigena	1	Selenomonas sputigena ATCC 35185 (Prj:66335)
45540	2	6141	6072	Mycobacterium fortuitum	0.5	Mycobacterium sp. VKM Ac-1817D
45637	2	8059	3981	Ruminococcus albus	1	Ruminococcus albus 7 = DSM 20455
45738	2	10327	5258	Rhodonellum psychrophilum	1	Rhodonellum psychrophilum DSM 17998 [PRJNA219509]
45745	2	4861	4855	Vibrio tubiashii	1	Vibrio tubiashii NCIMB 1337 = ATCC 19106
45832	2	3282	1686	Bifidobacterium angulatum	1	Bifidobacterium angulatum
45941	2	2185	2138	Clostridiales bacterium	0.5	Clostridiales bacterium 9400853
46080	2	15081	7762	Myxococcus xanthus	1	Myxococcus xanthus DZF1
46095	2	3398	1748	Bifidobacterium choerinum	1	Bifidobacterium choerinum DSM 20434
46145	2	1786	1776	Streptococcus oralis	1	Streptococcus oralis ATCC 35037 (Prj:53033)
46326	2	8814	4623	Roseomonas mucosa	0.5	Roseomonas sp. B5
46334	2	3329	1707	Bifidobacterium minimum	1	Bifidobacterium minimum DSM 20102
46381	2	8130	4260	Kordiimonas gwangyangensis	1	Kordiimonas gwangyangensis JCM 12864
46495	2	17443	9484	Streptomyces avermitilis	1	Streptomyces avermitilis MA-4680
46559	2	5849	5815	Pseudomonas sp.	1	Pseudomonas sp. GM16
46611	2	6508	3331	Ketogulonicigenium vulgare	1	Ketogulonicigenium vulgare WSH-001
46612	2	15713	10066	Aphanocapsa montana	0.5	Aphanocapsa montana BDHKU210001
46644	2	5111	5090	Gordonia terrae	1	Gordonia terrae NBRC 100016
46691	2	3223	3095	Ectothiorhodospira haloalkaliphila	0.5	Halorhodospira halochloris str. A
46803	2	3962	3918	Vibrio sp.	1	Vibrio sp. DCR 1-4-12
46905	2	4409	4296	Chloroflexus aurantiacus	0.5	Chloroflexus aurantiacus J-10-fl
46912	2	3729	1908	Bifidobacterium tsurumiense	1	Bifidobacterium tsurumiense
47013	2	2448	1577	Borrelia coriaceae	1	Borrelia coriaceae ATCC 43381
47015	2	6485	3328	Bacteroides barnesiae	1	Bacteroides barnesiae DSM 18169
47056	2	2189	2186	Bifidobacterium psychraerophilum	1	Bifidobacterium psychraerophilum
47077	2	2662	2628	Enterococcus dispar	1	Enterococcus dispar ATCC 51266 [PRJNA206267]
47107	2	6031	3115	Tepidanaerobacter acetatoxydans	1	Tepidanaerobacter acetatoxydans
47270	2	6217	3213	Fibrobacter succinogenes	1	Fibrobacter succinogenes subsp. succinogenes S85 (Prj:47)
47374	2	9436	5001	Prolixibacter bellariivorans	1	Prolixibacter bellariivorans ATCC BAA-1284
47375	2	4778	2521	Prevotella albensis	1	Prevotella albensis DSM 11370
47482	2	7072	3629	Geobacter metallireducens	1	Geobacter metallireducens GS-15
47700	2	3837	3768	Coprobacillus sp.	1	Coprobacillus sp. 29_1
47799	2	2277	2248	Francisella noatunensis	1	Francisella noatunensis subsp. orientalis LADL--07-285A
48029	2	9916	5364	Hydrogenophaga intermedia	0.5	Hydrogenophaga sp. PBC
48051	2	4273	2179	Bartonella tamiae	1	Bartonella tamiae Th307
48286	2	5624	2917	Gluconobacter oxydans	1	Gluconobacter oxydans DSM 2003
48289	2	1330	1297	Bartonella clarridgeiae	1	Bartonella clarridgeiae 73
48300	2	1542	1541	Bifidobacterium magnum	1	Bifidobacterium magnum
48315	2	9397	4995	Bacteroides gallinarum	1	Bacteroides gallinarum DSM 18171
48504	2	2405	1244	Atopobium vaginae	1	Atopobium vaginae DSM 15829
48591	2	2045	2019	Streptococcus pseudoporcinus	1	Streptococcus pseudoporcinus SPIN 20026
48736	2	6732	3541	Bacteroides graminisolvens	1	Bacteroides graminisolvens DSM 19988
48793	2	9548	4833	Xanthobacteraceae bacterium	0.5	Ancylobacter sp. FA202
48821	2	4865	2426	Lactobacillus kefiranofaciens	1	Lactobacillus kefiranofaciens ZW3
48897	2	4881	4851	Endozoicomonas elysicola	1	Endozoicomonas elysicola DSM 22380
48964	2	10123	5468	Bacillus boroniphilus	0.5	Bacillus boroniphilus JCM 21738
49128	2	7917	4319	Sphingomonas paucimobilis	0.5	Sphingomonas sp. S17
49271	2	9959	4893	Lysinibacillus sphaericus	1	Lysinibacillus sphaericus CBAM5
49360	2	3771	1980	Porphyromonas uenonis	1	Porphyromonas uenonis DSM 23387
49447	2	9969	5109	Cytophaga fermentans	1	Cytophaga fermentans JCM 21142
49590	2	4718	2362	Carnobacterium jeotgali	1	Carnobacterium jeotgali
49663	2	4754	2531	Corynebacterium ulcerans	1	Corynebacterium ulcerans NCTC 12077
49839	2	730	728	Candidatus Kinetoplastibacterium	1	Candidatus Kinetoplastibacterium crithidii TCC036E
50015	2	4441	2279	Streptococcus urinalis	1	Streptococcus urinalis 2285-97
50024	2	5591	2984	Prevotella corporis	1	Prevotella corporis JCM 8529
50175	2	5465	2808	Treponema socranskii	1	Treponema socranskii subsp. socranskii VPI DR56BR1116
50212	2	8733	4809	Paracoccus pantotrophus	1	Paracoccus pantotrophus J46
50236	2	1916	1895	Bifidobacterium ruminantium	1	Bifidobacterium ruminantium
50290	2	3116	1633	Atopobium minutum	0.5	Atopobium sp. BV3Ac4
50307	2	10088	5387	Herbaspirillum seropedicae	1	Herbaspirillum seropedicae Os45
50397	2	4831	2489	Prevotella marshii	1	Prevotella marshii DSM 16973
50408	2	4996	2530	Megasphaera sp.	1	Megasphaera sp. NM10
50416	2	9217	5170	Enterobacter hormaechei	0.5	Enterobacter hormaechei ATCC 49162
50592	2	9462	5479	Clostridium carboxidivorans	1	Clostridium carboxidivorans P7 (Prj:48985)
50692	2	6480	3554	Lactobacillus fabifermentans	1	Lactobacillus fabifermentans DSM 21115
50755	2	5181	2699	Brochothrix thermosphacta	1	Brochothrix thermosphacta DSM 20171 = FSL F6-1036
50810	2	2410	1235	Candidatus Ruthia	1	Candidatus Ruthia magnifica UCD-CM
50831	2	4521	2369	Staphylococcus massiliensis	1	Staphylococcus massiliensis CCUG 55927
50836	2	1679	1658	Helicobacter pylori	1	Helicobacter pylori Hp P-2b
50871	2	13194	8412	Pseudomonas bauzanensis	0.5	Pseudomonas bauzanensis
50972	2	4807	2542	Staphylococcus caprae	0.5	Staphylococcus caprae C87
51294	2	14912	7751	Nocardia seriolae	1	Nocardia seriolae ZJ0503
51350	2	15106	7721	Chlorogloeopsis fritschii	0.5	Chlorogloeopsis fritschii PCC 6912
51374	2	1957	1944	Prochlorococcus marinus	1	Prochlorococcus marinus subsp. pastoris str. CCMP1986
51388	2	4387	2312	Bartonella grahamii	1	Bartonella grahamii ATCC 700132
51572	2	3404	3384	Lonsdalea quercina	1	Lonsdalea quercina subsp. quercina
51584	2	11730	6410	Bacillus sp.	1	Bacillus sp. JCM 19046
51883	2	13687	7505	Streptomyces pluripotens	0.5	Streptomyces pluripotens MUSC 135
52029	2	6421	3293	Thermobifida fusca	1	Thermobifida fusca YX
52043	2	10092	7364	Clostridium ultunense	1	Clostridium ultunense DSM 10521
52104	2	7141	3940	Fluoribacter dumoffii	1	Fluoribacter dumoffii NY 23
52138	2	1828	936	Candidatus Photodesmus	1	Candidatus Photodesmus katoptron
52167	2	1605	1593	Helicobacter pylori	1	Helicobacter pylori 1089/03
52280	2	5825	3155	Porphyromonadaceae bacterium	1	Porphyromonadaceae bacterium OUH 308042
52301	2	10698	5674	Bacillus cereus	1	Bacillus cereus BAG2X1-3
52315	2	8242	5634	Clostridium stercorarium	0.5	Clostridium cellulosi CS-4-4
52317	2	5242	2684	Helicobacter bilis	1	Helicobacter bilis ATCC 49320
52323	2	7231	3825	Gluconacetobacter diazotrophicus	1	Gluconacetobacter diazotrophicus PAl 5 (Prj:21071)
52329	2	5504	3003	Turicibacter sanguinis	0.5	Turicibacter sanguinis PC909
52360	2	6574	3581	endosymbiont of	1	endosymbiont of Tevnia jerichonana (vent Tica)
52372	2	5846	3241	Legionella oakridgensis	1	Legionella oakridgensis ATCC 33761 = DSM 21215
52396	2	4728	2838	Leuconostoc gasicomitatum	0.5	Leuconostoc inhae KCTC 3774
52409	2	15670	8240	Streptomyces xanthophaeus	1	Streptomyces xanthophaeus
52481	2	10362	5697	Pseudomonas taiwanensis	0.5	Pseudomonas taiwanensis DSM 21245
52501	2	4594	2371	Actinobacillus suis	1	Actinobacillus suis ATCC 33415
52542	2	3507	1842	Helicobacter suis	1	Helicobacter suis HS1
52547	2	8109	4247	Saccharomonospora viridis	1	Saccharomonospora viridis DSM 43017
52640	2	3269	1663	Rickettsia bellii	1	Rickettsia bellii OSU 85-389
52665	2	10180	5410	Actinoalloteichus cyanogriseus	1	Actinoalloteichus cyanogriseus
52682	2	8680	4683	Virgibacillus sp.	1	Virgibacillus sp. CM-4
52685	2	8939	4889	Bacillus badius	1	Bacillus badius MTCC 30822
52691	2	14837	7825	Streptomyces sp.	1	Streptomyces sp. NRRL S-474
52773	2	4177	2329	Helicobacter typhlonius	0.5	Helicobacter typhlonius MIT 98-6810
52813	2	15413	8757	Streptomyces viridosporus	0.5	Streptomyces viridosporus T7A
52818	2	8008	4209	Bordetella trematum	1	Bordetella trematum CCUG 13902
52822	2	4420	2391	Phocaeicola abscessus	0.5	Bacteroidetes bacterium oral taxon 272 str. F0290
52932	2	14181	8055	Methylobacterium sp.	1	Methylobacterium sp. WSM2598
52957	2	8247	5017	Clostridiales bacterium	0.5	Anaerotruncus colihominis DSM 17241
52974	2	3410	1958	Mogibacterium timidum	0.5	Mogibacterium sp. CM50
53012	2	9647	5127	Leptospira borgpetersenii	1	Leptospira borgpetersenii serovar Mini str. 200901116
53086	2	7904	4462	Bacillus ginsengihumi	1	Bacillus ginsengihumi M2.11
53108	2	7354	4106	Tatumella ptyseos	0.5	Tatumella sp. UCD-D_suzukii
53127	2	1640	1619	Helicobacter pylori	1	Helicobacter pylori SA173A
53137	2	3443	2091	Prochlorococcus sp.	1	Prochlorococcus sp. scB243_498I20
53142	2	9185	4860	Lysinibacillus fusiformis	1	Lysinibacillus fusiformis ZB2
53193	2	3203	1647	Helicobacter pylori	1	Helicobacter pylori NQ315
53209	2	8419	4708	Paracoccus sp.	1	Paracoccus sp. J55
53240	2	8531	4700	Desulfitobacterium dehalogenans	0.5	Desulfitobacterium sp. PCE1
53242	2	5150	2966	Cetobacterium sp.	1	Cetobacterium sp. ZOR0034
53279	2	12288	7140	Rhodococcus rhodochrous	0.5	Rhodococcus rhodochrous ATCC 21198
53318	2	12550	7408	Bacillus oceanisediminis	0.5	Bacillus sp. 2_A_57_CT2
53326	2	6176	3355	Treponema phagedenis	1	Treponema phagedenis F0421
53328	2	11390	6293	Enterobacter radicincitans	0.5	Enterobacter radicincitans DSM 16656
53350	2	12820	7122	Streptomyces sp.	1	Streptomyces sp. CNT318
53403	2	8614	4589	Alcanivorax sp.	1	Alcanivorax sp. 43B_GOM-46m
53405	2	8782	4885	Yersinia intermedia	1	Yersinia intermedia Y228
53411	2	15985	8429	Burkholderia sp.	1	Burkholderia sp. MSh1
53434	2	8456	5255	Bacteroides caccae	1	Bacteroides caccae ATCC 43185
53435	2	4969	2658	Staphylococcus arlettae	0.5	Staphylococcus arlettae CVD059
53446	2	8146	4569	Candidatus Microthrix	1	Candidatus Microthrix parvicella Bio17-1
53464	2	8788	4751	Bacillus clausii	1	Bacillus clausii
53476	2	4348	2274	Riemerella anatipestifer	1	Riemerella anatipestifer RA-CH-1
53487	2	7990	4293	Bacillus sp.	0.5	Halobacillus sp. BAB-2008
53501	2	3737	2009	Leuconostoc gelidum	1	Leuconostoc gelidum JB7
53507	2	3298	1775	Bartonella vinsonii	1	Bartonella vinsonii subsp. arupensis OK-94-513
53518	2	5999	3380	Acidithiobacillus caldus	1	Acidithiobacillus caldus ATCC 51756
53531	2	9070	4705	Clostridium clariflavum	1	Clostridium clariflavum DSM 19732
53544	2	12825	6300	Arthrospira maxima	0.5	Arthrospira maxima CS-328
53575	2	4010	2074	Haemophilus sputorum	1	Haemophilus sputorum CCUG 13788
53607	2	6624	3792	Desulfovibrio sp.	1	Desulfovibrio sp. 3_1_syn3
53629	2	2244	1276	Borrelia valaisiana	1	Borrelia valaisiana VS116
53654	2	12645	7219	Mycobacterium austroafricanum	0.5	Mycobacterium vanbaalenii PYR-1
53678	2	2089	1080	Chlamydophila abortus	1	Chlamydophila abortus LLG
53717	2	9049	4781	Pseudomonas fragi	0.5	Pseudomonas fragi A22
53719	2	3635	2022	Lactobacillus animalis	1	Lactobacillus animalis
53728	2	6105	3283	Pseudoxanthomonas sp.	1	Pseudoxanthomonas sp. GW2
53737	2	1747	1740	Campylobacter fetus	0.5	Campylobacter sp. 03-427
53828	2	6020	3384	Desulfotomaculum nigrificans	0.5	Desulfotomaculum nigrificans DSM 574
53847	2	14893	8135	Burkholderia zhejiangensis	0.5	Burkholderia sp. SJ98
53864	2	4438	2420	Actinomyces urogenitalis	1	Actinomyces urogenitalis S6-C4
53955	2	5479	3175	Prevotella bryantii	1	Prevotella bryantii B14
53960	2	6687	3597	Propionibacterium acidipropionici	1	Propionibacterium acidipropionici DSM 4900
53982	2	2963	1487	Weissella koreensis	1	Weissella koreensis KACC 15510
53987	2	9013	4867	Salmonella enterica	1	Salmonella enterica subsp. arizonae serovar 62:z4,z23:-
54012	2	2486	1285	Lactobacillus florum	1	Lactobacillus florum 8D
54059	2	4510	2336	Oribacterium sp.	1	Oribacterium sp. ACB8
54086	2	14573	8121	Streptomyces sp.	1	Streptomyces sp. NRRL F-5053
54092	2	9082	5116	Lysinibacillus sphaericus	0.5	Lysinibacillus sphaericus KCTC 3346
54110	2	4700	2905	Lactobacillus vini	1	Lactobacillus vini JP7.8.9
54117	2	12380	6897	Robinsoniella peoriensis	0.5	Robinsoniella sp. KNHs210
54129	2	8421	4535	Sediminibacillus halophilus	0.5	Bacillus sp. NSP22.2
54168	2	5000	2713	Corynebacterium glucuronolyticum	1	Corynebacterium glucuronolyticum ATCC 51867
54203	2	10389	5477	Pseudomonas sp.	1	Pseudomonas sp. H2
54269	2	1772	951	Wolbachia endosymbiont	1	Wolbachia endosymbiont of Onchocerca volvulus str. Cameroon
54275	2	14767	7910	Streptomyces baarnensis	0.5	Streptomyces albus subsp. albus
54286	2	11587	6822	Bacillus endophyticus	0.5	Bacillus sp. REN51N
54287	2	6729	3923	Sporolactobacillus terrae	1	Sporolactobacillus terrae DSM 11697
54297	2	3521	2004	Eremococcus coleocola	1	Eremococcus coleocola ACS-139-V-Col8
54314	2	5827	3099	Listeria ivanovii	1	Listeria ivanovii subsp. londoniensis WSLC 30151
54315	2	12766	7108	Paenibacillus odorifer	0.5	Paenibacillus odorifer DSM 15391
54335	2	9040	5004	Chryseobacterium indologenes	0.5	Chryseobacterium sp. UNC8MFCol
54353	2	9770	5651	Pectobacterium carotovorum	1	Pectobacterium carotovorum subsp. odoriferum
54356	2	3938	2243	Streptococcus hongkongensis	0.5	Streptococcus hongkongensis CAIM 1895
54369	2	10257	6119	Algibacter lectus	1	Algibacter lectus JCM 19300
54390	2	3575	1989	Melissococcus plutonius	1	Melissococcus plutonius DAT561
54396	2	8665	4706	Pectobacterium betavasculorum	1	Pectobacterium betavasculorum
54420	2	6737	3751	Listeriaceae bacterium	1	Listeriaceae bacterium FSL A5-0209
54437	2	7013	3737	Pseudomonas thermotolerans	1	Pseudomonas thermotolerans J53
54439	2	7230	3932	Desulfovibrio alaskensis	1	Desulfovibrio alaskensis DSM 16109
54445	2	11395	8027	Virgibacillus halodenitrificans	1	Virgibacillus halodenitrificans
54457	2	7552	4790	Bacteroides eggerthii	1	Bacteroides eggerthii 1_2_48FAA
54469	2	6883	3611	Geobacter sulfurreducens	1	Geobacter sulfurreducens PCA
54471	2	5927	3207	Alcanivorax borkumensis	0.5	Alcanivorax borkumensis SK2
54472	2	8051	4614	Geobacillus caldoxylosilyticus	1	Geobacillus caldoxylosilyticus CIC9
54483	2	9601	5123	Pseudomonas poae	0.5	Pseudomonas fluorescens BRIP34879
54487	2	10810	5706	Caulobacter henricii	1	Caulobacter henricii
54494	2	11834	6564	Pseudomonas tolaasii	1	Pseudomonas tolaasii 6264
54518	2	4169	2502	Porphyromonas gingivicanis	1	Porphyromonas gingivicanis COT-022_OH1391
54521	2	12475	6876	Paenibacillus vortex	0.5	Paenibacillus vortex V453
54532	2	9500	5568	Alicycliphilus denitrificans	1	Alicycliphilus denitrificans BC
54558	2	14312	7345	Pseudomonas nitroreducens	1	Pseudomonas nitroreducens HBP1
54563	2	9808	5718	Lysinibacillus boronitolerans	1	Lysinibacillus boronitolerans F1182
54583	2	10010	5509	Salinispora pacifica	1	Salinispora pacifica CNT569
54592	2	7384	4746	Clostridium cf.	0.5	Clostridium sp. M62/1
54601	2	3792	2225	Lactobacillus curvatus	1	Lactobacillus curvatus NRIC0822
54611	2	3117	1731	Clostridiales genomosp.	1	Clostridiales genomosp. BVAB3 str. UPII9-5
54633	2	13908	7886	Streptomyces sp.	1	Streptomyces sp. NRRL WC-3795
54637	2	9046	4881	Pectobacterium atrosepticum	1	Pectobacterium atrosepticum CFBP 6276
54641	2	8932	4852	Yokenella regensburgei	1	Yokenella regensburgei ATCC 49455
54652	2	10230	5438	Pseudomonas sp.	1	Pseudomonas sp. HYS
54656	2	6897	3708	Curtobacterium flaccumfaciens	1	Curtobacterium flaccumfaciens MEB126
54658	2	14878	8439	Streptomyces olivaceus	0.5	Streptomyces sp. FXJ7.023
54659	2	4451	2628	Lactobacillus equi	1	Lactobacillus equi JCM 10991
54672	2	9903	5414	Prauserella rugosa	0.5	Prauserella sp. Am3
54717	2	3988	2143	Streptococcus sp.	1	Streptococcus sp. GMD5S
54766	2	4835	2638	Staphylococcus sp.	1	Staphylococcus sp. URHA0057
54767	2	2360	1299	Rickettsia canadensis	1	Rickettsia canadensis str. McKiel
54778	2	5244	2792	Corynebacterium vitaeruminis	1	Corynebacterium vitaeruminis Ga6A13
54782	2	3058	1650	Alloscardovia omnicolens	1	Alloscardovia omnicolens F0580
54783	2	7795	4535	Butyrivibrio sp.	1	Butyrivibrio sp. AD3002
54805	2	10394	5639	Pseudomonas syringae	1	Pseudomonas syringae CC1524
54814	2	6857	3882	Kocuria polaris	0.5	Kocuria sp. UCD-OTCP
54823	2	8062	4669	Butyrivibrio sp.	1	Butyrivibrio sp. WCE2006
54828	2	8469	4516	Methylomicrobium agile	0.5	Methylomicrobium agile
54839	2	9033	4975	Saccharomonospora azurea	1	Saccharomonospora azurea NA-128
54847	2	4304	2404	Thermosipho africanus	1	Thermosipho africanus TCF52B
54868	2	6738	3657	Exiguobacterium acetylicum	0.5	Exiguobacterium sp. ZWU0009
54873	2	9089	5359	Bacteroides salyersiae	1	Bacteroides salyersiae WAL 10018 = DSM 18765 = JCM 12988
54916	2	9660	5658	Arthrobacter aurescens	0.5	Arthrobacter aurescens TC1
54931	2	6312	3743	Cloacibacillus evryensis	0.5	Cloacibacillus evryensis DSM 19522
54938	2	4021	2278	Campylobacter jejuni	1	Campylobacter jejuni subsp. doylei 269.97
55017	2	3173	1743	Megasphaera genomosp.	0.5	Megasphaera genomosp. type_1 str. 28L
55034	2	6193	3359	Methylococcus capsulatus	1	Methylococcus capsulatus str. Bath
55062	2	13601	8568	Streptomyces sp.	1	Streptomyces sp. Amel2xE9
55068	2	9301	5214	Brevibacillus thermoruber	1	Brevibacillus thermoruber PM1
55085	2	4194	2319	Actinomyces georgiae	1	Actinomyces georgiae F0490
55103	2	2892	1526	Peptoniphilus sp.	1	Peptoniphilus sp. ChDC B134
55121	2	3120	1885	Holospora undulata	0.5	Holospora elegans E1
55139	2	13492	7823	Rhizobium etli	1	Rhizobium etli CFN 42
55165	2	3724	2083	Olsenella uli	1	Olsenella uli MSTE5
55184	2	11762	7045	Clostridiales bacterium	0.5	Clostridiales bacterium VE202-15
55193	2	6351	3480	Desulfovibrio desulfuricans	0.5	Desulfovibrio desulfuricans subsp. aestuarii DSM 17919 = ATCC 29578
55200	2	6218	3834	Microbacterium laevaniformans	0.5	Microbacterium laevaniformans OR221
55214	2	4796	2727	Thermus oshimai	1	Thermus oshimai JL-2
55217	2	7738	4793	Parabacteroides johnsonii	1	Parabacteroides johnsonii CL02T12C29
55232	2	13765	7486	Rhizobium leguminosarum	1	Rhizobium leguminosarum bv. trifolii CB782
55236	2	4514	2412	Snodgrassella alvi	1	Snodgrassella alvi
55240	2	12292	7009	Methylobacterium oryzae	0.5	Methylobacterium sp. UNCCL110
55266	2	8707	4844	Arthrobacter sp.	1	Arthrobacter sp. MWB30
55276	2	16941	9934	Streptomyces purpeofuscus	0.5	Kitasatospora sp. MBT66
55283	2	4999	2686	Staphylococcus simulans	1	Staphylococcus simulans UMC-CNS-990
55290	2	5107	2832	Akkermansia muciniphila	1	Akkermansia muciniphila ATCC BAA-835
55298	2	5537	3191	Moorella thermoacetica	1	Moorella thermoacetica ATCC 39073
55309	2	6763	3944	Arthrobacter sp.	1	Arthrobacter sp. TB 23
55338	2	6575	4102	Serratia symbiotica	1	Serratia symbiotica
55343	2	12331	6761	Achromobacter xylosoxidans	0.5	Achromobacter undefined 7393
55367	2	12891	7932	Clostridiales bacterium	1	Clostridiales bacterium VE202-28
55413	2	7799	4409	Gluconacetobacter rhaeticus	0.5	Gluconacetobacter sp. SXCC-1
55420	2	7224	3828	Bdellovibrio bacteriovorus	1	Bdellovibrio bacteriovorus
55430	2	7054	4212	Anaerostipes caccae	0.5	Anaerostipes caccae DSM 14662
55464	2	6276	3719	Alistipes onderdonkii	0.5	Alistipes onderdonkii DSM 19147
55468	2	7300	4705	Ruminococcus sp.	0.5	Blautia sp. KLE 1732
55505	2	13845	8574	Clostridiales bacterium	0.5	Clostridiales bacterium VE202-27
55554	2	8903	4852	Chromobacterium violaceum	1	Chromobacterium violaceum ATCC 12472
55568	2	5424	3202	Ruminococcus lactaris	1	Ruminococcus lactaris ATCC 29176
55603	2	11280	6201	Mycobacterium gilvum	1	Mycobacterium gilvum PYR-GCK
55652	2	11349	6613	Nocardiopsis halophila	0.5	Nocardiopsis baichengensis YIM 90130
55661	2	14519	8318	Rhizobium tropici	0.5	Rhizobium tropici YR635
55684	2	3861	2183	Helicobacter hepaticus	0.5	Helicobacter hepaticus ATCC 51449
55718	2	8655	4764	Bacillus subtilis	1	Bacillus subtilis gtP20b
55732	2	5193	3047	Hallella seregens	0.5	Hallella seregens ATCC 51272
55743	2	5526	3157	Listeria grayi	1	Listeria grayi DSM 20601
55759	2	4040	2243	Lactobacillus oris	1	Lactobacillus oris PB013-T2-3
55770	2	5801	3340	Erysipelotrichaceae bacterium	0.5	Erysipelotrichaceae bacterium 5_2_54FAA
55793	2	9223	5191	Glaciecola mesophila	0.5	Glaciecola mesophila KMM 241
55807	2	7969	4415	Bacillus amyloliquefaciens	0.5	Bacillus amyloliquefaciens JJC33M
55834	2	11658	6274	Cupriavidus taiwanensis	1	Cupriavidus taiwanensis STM 6018
55839	2	12924	7241	Variovorax paradoxus	1	Variovorax paradoxus S110
55858	2	3997	2385	Haemophilus somnus	1	Haemophilus somnus 129PT
55877	2	6700	3858	Chromohalobacter israelensis	0.5	Chromohalobacter salexigens DSM 3043
55887	2	6431	3929	Ruminococcus flavefaciens	1	Ruminococcus flavefaciens 17
55890	2	4513	2506	Lachnospira multipara	1	Lachnospira multipara MC2003
55906	2	8738	4895	Stenotrophomonas maltophilia	1	Stenotrophomonas maltophilia D457
55925	2	3869	2242	Bartonella washoensis	1	Bartonella washoensis Sb944nv
55957	2	4837	2757	Prevotella pleuritidis	1	Prevotella pleuritidis JCM 14110
55961	2	6231	3541	Exiguobacterium antarcticum	1	Exiguobacterium antarcticum B7
55991	2	13576	7724	Mesorhizobium loti	1	Mesorhizobium loti R7A
55994	2	3979	2126	Corynebacterium urealyticum	1	Corynebacterium urealyticum DSM 7111
56001	2	4171	2274	Thermodesulfovibrio yellowstonii	0.5	Thermodesulfovibrio islandicus DSM 12570
56010	2	3309	1871	Veillonella montpellierensis	1	Veillonella montpellierensis DNF00314
56027	2	7776	4341	Bacillus isronensis	0.5	Solibacillus silvestris StLB046
56030	2	3780	2111	Streptococcus vestibularis	1	Streptococcus vestibularis ATCC 49124
56031	2	5571	3382	Blautia hansenii	0.5	Blautia hansenii DSM 20583
56056	2	4089	2147	Streptococcus suis	1	Streptococcus suis YS67
56071	2	6244	3645	Alistipes finegoldii	0.5	Alistipes sp. HGB5
56085	2	12557	6942	Pseudomonas alcaligenes	1	Pseudomonas alcaligenes MRY13-0052
56094	2	8544	4695	Bacillus cibi	0.5	Bacillus cibi
56100	2	10279	6357	Pseudomonas parafulva	0.5	Pseudomonas parafulva
56129	2	8009	4654	Butyrivibrio sp.	1	Butyrivibrio sp. FC2001
56136	2	8105	4694	Thauera sp.	1	Thauera sp. 27
56149	2	11979	7802	Novosphingobium resinovorum	0.5	Novosphingobium resinovorum
56159	2	16690	9358	Burkholderia sp.	1	Burkholderia sp. RPE67
56168	2	5759	3249	Dermacoccus nishinomiyaensis	0.5	Dermacoccus sp. Ellin185
56209	2	6322	3659	Microbacterium paraoxydans	0.5	Microbacterium paraoxydans 77MFTsu3.2
56214	2	6574	3996	Anaeromusa acidaminophila	0.5	Anaeroarcus burkinensis DSM 6283
56237	2	3781	2546	[Eubacterium] cylindroides	1	[Eubacterium] cylindroides ATCC 27803
56242	2	12366	7018	Paenibacillus lactis	0.5	Paenibacillus lactis 154
56244	2	8765	4794	Paenibacillus barengoltzii	0.5	Paenibacillus sp. J14
56261	2	11599	6294	Mycobacterium sp.	1	Mycobacterium sp. UNC410CL29Cvi84
56262	2	12751	6977	Pseudomonas fluorescens	0.5	Pseudomonas fluorescens BBc6R8
56280	2	4509	2627	Actinomyces sp.	1	Actinomyces sp. oral taxon 877 str. F0543
56292	2	14359	8332	Mesorhizobium loti	0.5	Mesorhizobium huakuii 7653R
56300	2	9955	5473	Serratia proteamaculans	0.5	Serratia sp. S4
56309	2	5705	3337	Prevotella sp.	1	Prevotella sp. P6B4
56321	2	9316	5191	Hyphomicrobium sp.	1	Hyphomicrobium sp. 802
56323	2	5252	3044	Carboxydothermus ferrireducens	0.5	Carboxydothermus ferrireducens DSM 11255
56325	2	4980	2979	Treponema vincentii	1	Treponema vincentii F0403
56338	2	3416	1822	Erysipelothrix rhusiopathiae	1	Erysipelothrix rhusiopathiae ATCC 19414
56348	2	8322	4806	Bacillus sp.	1	Bacillus sp. 37MA
56351	2	9345	4995	Cyanothece sp.	1	Cyanothece sp. PCC 8802
56378	2	3242	1821	Lactobacillus saerimneri	1	Lactobacillus saerimneri 30a
56389	2	4036	2159	Lactobacillus equicursoris	0.5	Lactobacillus equicursoris CIP 110162
56391	2	6456	3446	Exiguobacterium sp.	1	Exiguobacterium sp. MH3
56450	2	12237	8257	Opitutaceae bacterium	1	Opitutaceae bacterium TAV5
56451	2	8745	4667	Arthrobacter nicotinovorans	1	Arthrobacter nicotinovorans 26Cvi1.1E
56461	2	5812	3261	Actinomyces massiliensis	1	Actinomyces massiliensis F0489
56465	2	3304	1721	Porphyromonas asaccharolytica	1	Porphyromonas asaccharolytica PR426713P-I
56482	2	7402	4177	Sulfobacillus thermosulfidooxidans	1	Sulfobacillus thermosulfidooxidans str. Cutipay
56491	2	12950	7669	Rhizobium sp.	1	Rhizobium sp. 42MFCr.1
56504	2	7734	4319	Geobacillus subterraneus	0.5	Geobacillus sp. G1w1
56506	2	13639	7647	Burkholderia graminis	0.5	Burkholderia sp. URHA0054
56529	2	5972	3169	Laribacter hongkongensis	1	Laribacter hongkongensis HLHK9
56541	2	3666	1996	Porphyromonas sp.	1	Porphyromonas sp. COT-290_OH3588CRE
56547	2	5000	2820	Kocuria palustris	0.5	Kocuria palustris PEL
56550	2	6282	3728	Coprobacter fastidiosus	0.5	Tannerella sp. 6_1_58FAA_CT1
56562	2	6040	3461	Exiguobacterium sp.	1	Exiguobacterium sp. GIC31
56577	2	4960	2979	Burkholderiales bacterium	0.5	Burkholderiales bacterium 1_1_47
56584	2	8146	4630	Stenotrophomonas maltophilia	1	Stenotrophomonas maltophilia ATCC 19867
56601	2	3727	1988	Campylobacter subantarcticus	1	Campylobacter subantarcticus LMG 24374
56616	2	3658	2020	Helicobacter pylori	1	Helicobacter pylori NQ1701
56626	2	5710	3293	Caldanaerobacter subterraneus	0.5	Thermoanaerobacter tengcongensis MB4
56654	2	2349	1330	Candidatus Liberibacter	1	Candidatus Liberibacter solanacearum
56670	2	4945	2886	Carnobacterium inhibens	0.5	Carnobacterium sp. WN1359
56675	2	2821	1549	Lactobacillus kunkeei	1	Lactobacillus kunkeei
56677	2	5432	3190	Mariprofundus ferrooxydans	1	Mariprofundus ferrooxydans PV-1
56688	2	8156	4472	Leptospira meyeri	1	Leptospira meyeri serovar Hardjo str. Went 5
56691	2	7775	4125	Leifsonia sp.	0.5	Leifsonia sp. 109
56696	2	12890	7217	Mycobacterium cosmeticum	0.5	Mycobacterium sp. UM_RHS
56702	2	17191	10567	Burkholderia cepacia	0.5	Burkholderia vietnamiensis AU4i
56703	2	2546	1465	Dialister micraerophilus	0.5	Dialister micraerophilus DSM 19965
56735	2	7003	4315	Bacteroides stercoris	1	Bacteroides stercoris ATCC 43183
56738	2	15364	9247	Burkholderia sp.	1	Burkholderia sp. CCGE1002
56741	2	15990	9176	Burkholderia fungorum	0.5	Burkholderia fungorum NBRC 102489
56743	2	7071	3931	Thalassolituus oleivorans	1	Thalassolituus oleivorans R6-15
56744	2	4351	2452	Oligella urethralis	1	Oligella urethralis DSM 7531
56751	2	11475	6927	Bacillus cereus	0.5	Bacillus cereus VD107
56752	2	4043	2263	Trueperella pyogenes	1	Trueperella pyogenes TP8
56778	2	3980	2241	Selenomonas noxia	1	Selenomonas noxia F0398
56785	2	8562	4666	Phaeobacter daeponensis	0.5	Rhodobacterales bacterium Y4I
56791	2	10143	5944	Gordonia terrae	0.5	Gordonia sp. KTR9
56792	2	5612	3548	Microbacterium hominis	0.5	Microbacterium hominis TPW29
56807	2	4241	2321	Streptococcus suis	1	Streptococcus suis YS24
56828	2	5142	2859	Sutterella wadsworthensis	1	Sutterella wadsworthensis HGA0223
56835	2	10990	6278	Pseudomonas synxantha	0.5	Pseudomonas sp. BRG-100
56837	2	4503	2396	Neisseria weaveri	1	Neisseria weaveri LMG 5135
56846	2	9852	5701	Pseudomonas mendocina	0.5	Pseudomonas oleovorans
56848	2	6199	3479	Lactobacillus pentosus	0.5	Lactobacillus plantarum EGD-AQ4
56849	2	8558	4832	Aliivibrio salmonicida	0.5	Aliivibrio salmonicida LFI1238
56855	2	3616	2013	Slackia exigua	0.5	Slackia exigua ATCC 700122
56864	2	5126	3032	Prevotella histicola	1	Prevotella histicola F0411
56880	2	4212	2689	Solobacterium moorei	1	Solobacterium moorei F0204
56899	2	15595	9737	Streptomyces wedmorensis	0.5	Streptomyces sp. SS
56901	2	14512	8608	Nocardia otitidiscaviarum	1	Nocardia otitidiscaviarum IFM 11049
56904	2	9357	5197	Pseudomonas mendocina	1	Pseudomonas mendocina ymp
56905	2	11760	6581	Pseudomonas sp.	1	Pseudomonas sp. GM60
56913	2	14657	8093	Rhizobium leguminosarum	1	Rhizobium leguminosarum bv. trifolii SRDI943
56921	2	8664	4850	Hafnia alvei	1	Hafnia alvei FB1
56931	2	8457	4953	Vibrio scophthalmi	0.5	Vibrio sp. N418
56944	2	15088	9464	Kitasatospora sp.	0.5	Kitasatospora sp. NRRL B-11411
56959	2	9588	6075	Marinobacter salarius	0.5	Marinobacter salarius R9SW1
56962	2	9403	5415	Flavobacterium sp.	1	Flavobacterium sp. KMS
56969	2	9237	5666	Bacillus azotoformans	1	Bacillus azotoformans MEV2011
56984	2	1274	656	Candidatus Blochmannia	1	Candidatus Blochmannia chromaiodes str. 640
56994	2	6424	3470	Exiguobacterium undae	1	Exiguobacterium undae 190-11
57003	2	9046	4964	Vibrio furnissii	1	Vibrio furnissii NCTC 11218
57004	2	8600	4878	Phaeobacter sp.	1	Phaeobacter sp. S26
57009	2	9545	5325	Methylocystis sp.	0.5	Methylosinus sp. LW3
57013	2	4344	2596	Eubacteriaceae bacterium	1	Eubacteriaceae bacterium OBRC8
57015	2	8626	4968	Erwinia oleae	0.5	Erwinia oleae DAPP-PG531
57016	2	18244	10630	Amycolatopsis orientalis	0.5	Amycolatopsis orientalis DSM 46075
57030	2	2362	1291	Gardnerella vaginalis	1	Gardnerella vaginalis 101
57031	2	9358	5401	Gordonia amicalis	1	Gordonia amicalis CCMA-559
57037	2	9046	5077	Anaeromyxobacter dehalogenans	0.5	Anaeromyxobacter dehalogenans 2CP-1
57043	2	5704	3523	Thermoanaerobacterium thermosaccharolyticum	1	Thermoanaerobacterium thermosaccharolyticum DSM 571
57048	2	8230	4666	Yersinia aldovae	1	Yersinia aldovae 670-83
57066	2	5204	2825	Corynebacterium matruchotii	1	Corynebacterium matruchotii ATCC 14266
57068	2	5295	3162	Helicobacter trogontum	1	Helicobacter trogontum ATCC 49310
57070	2	6165	3401	Exiguobacterium sp.	1	Exiguobacterium sp. NG55
57075	2	13720	7970	Rhizobium etli	1	Rhizobium etli bv. phaseoli str. IE4803
57080	2	13854	8091	Burkholderia ambifaria	1	Burkholderia ambifaria AMMD
57081	2	3159	1701	Campylobacter coli	1	Campylobacter coli 76339
57094	2	11539	6744	Desulfatibacillum alkenivorans	0.5	Desulfatibacillum alkenivorans AK-01
57118	2	9860	6289	Pseudomonas luteola	0.5	Pseudomonas sp. HPB0071
57123	2	4002	2143	Haemophilus parainfluenzae	1	Haemophilus parainfluenzae HK262
57139	2	3866	2242	Shuttleworthia satelles	0.5	Shuttleworthia satelles DSM 14600
57143	2	7984	4850	Acidovorax ebreus	0.5	Acidovorax ebreus TPSY
57144	2	10999	6254	Mycobacterium tuberculosis	0.5	Mycobacterium colombiense CECT 3035
57150	2	14332	8446	Streptomyces cyaneofuscatus	0.5	Streptomyces cyaneofuscatus
57174	2	9751	5824	Nitratireductor aquibiodomus	1	Nitratireductor aquibiodomus NL21 = JCM 21793
57177	2	4584	2726	Bergeyella zoohelcum	1	Bergeyella zoohelcum CCUG 30536
57178	2	7218	4279	Butyrivibrio sp.	1	Butyrivibrio sp. AE3006
57188	2	6601	3736	Acidocella facilis	0.5	Acidocella sp. MX-AZ02
57193	2	6147	3635	Lactobacillus paraplantarum	0.5	Lactobacillus paraplantarum L-ZS9
57216	2	5553	3420	Prevotella salivae	1	Prevotella salivae F0493
57242	2	4928	2744	Lactobacillus buchneri	1	Lactobacillus buchneri NRRL B-30929
57246	2	7693	4301	Ruminococcus albus	1	Ruminococcus albus SY3
57247	2	2975	1656	Dehalococcoides ethenogenes	0.5	Dehalococcoides mccartyi CG4
57248	2	5754	3431	Lachnoanaerobaculum saburreum	1	Lachnoanaerobaculum saburreum DSM 3986
57251	2	4331	2417	Campylobacter curvus	0.5	Campylobacter curvus 525.92
57255	2	12018	6810	Pseudomonas chlororaphis	0.5	Pseudomonas sp. GM17
57271	2	4258	2703	Candidatus Hamiltonella	1	Candidatus Hamiltonella defensa 5AT (Acyrthosiphon pisum)
57280	2	16076	9855	Streptomyces sp.	1	Streptomyces sp. NRRL S-337
57302	2	8773	4903	Thalassospira permensis	0.5	Thalassospira xiamenensis M-5 = DSM 17429
57305	2	8430	5017	Cronobacter turicensis	1	Cronobacter turicensis z3032
57319	2	6026	3429	Exiguobacterium alkaliphilum	0.5	Exiguobacterium sp. AB2
57321	2	6787	3894	Butyrivibrio sp.	1	Butyrivibrio sp. NC2007
57331	2	5389	3069	Staphylococcus aureus	0.5	Staphylococcus sciuri subsp. sciuri Z8
57334	2	3511	1950	Facklamia hominis	1	Facklamia hominis CCUG 36813
57359	2	5527	3231	Actinomyces johnsonii	0.5	Actinomyces sp. oral taxon 849 str. F0330
57374	2	3862	2291	Anaerococcus lactolyticus	1	Anaerococcus lactolyticus ATCC 51172
57378	2	4373	2621	Leptotrichia wadei	1	Leptotrichia wadei F0279
57386	2	14557	8887	Streptomyces griseoluteus	0.5	Streptomyces griseoluteus
57389	2	11687	6618	Brevibacillus brevis	1	Brevibacillus brevis NBRC 100599
57391	2	8346	5317	Sphingobium xenophagum	1	Sphingobium xenophagum QYY
57394	2	2638	1423	Lactobacillus fructivorans	1	Lactobacillus fructivorans KCTC 3543
57410	2	7771	4477	Deinococcus ficus	0.5	Deinococcus sp. 2009
57412	2	15072	9828	Mesorhizobium sp.	1	Mesorhizobium sp. WSM2561
57413	2	6846	4477	Acidithiobacillus ferrivorans	1	Acidithiobacillus ferrivorans SS3
57418	2	7333	4233	Clostridium sp.	1	Clostridium sp. JCD
57430	2	8336	4918	Photobacterium leiognathi	1	Photobacterium leiognathi lrivu.4.1
57437	2	12501	8016	Aphanizomenon flos-aquae	1	Aphanizomenon flos-aquae 2012/KM/D3
57440	2	3263	1742	Helicobacter pylori	1	Helicobacter pylori NQ4099
57445	2	4559	2778	Neochlamydia sp.	1	Neochlamydia sp. EPS4
57453	2	5828	3479	Faecalibacterium prausnitzii	1	Faecalibacterium prausnitzii M21/2
57458	2	11719	7934	Vibrio shiloi	0.5	Vibrio sp. ER1A
57464	2	4389	2566	Snodgrassella alvi	1	Snodgrassella alvi wkB2
57466	2	7947	4477	Pseudogulbenkiania ferrooxidans	0.5	Pseudogulbenkiania sp. NH8B
57475	2	4056	2296	Actinomyces odontolyticus	1	Actinomyces odontolyticus ATCC 17982
57476	2	18718	12154	Streptosporangium roseum	1	Streptosporangium roseum DSM 43021
57478	2	4619	2699	Eubacteriaceae bacterium	1	Eubacteriaceae bacterium CM5
57479	2	12684	7758	Micromonospora purpureochromogenes	0.5	Micromonospora purpureochromogenes
57482	2	4614	3467	Negativicoccus succinicivorans	0.5	Negativicoccus succinicivorans DORA_17_25
57497	2	7118	4476	Butyrivibrio proteoclasticus	1	Butyrivibrio proteoclasticus FD2007
57499	2	5460	3100	Thioalkalivibrio sp.	1	Thioalkalivibrio sp. ALR17-21
57501	2	15140	9450	Streptomyces lavenduligriseus	0.5	Streptomyces achromogenes subsp. achromogenes
57502	2	10493	5824	Rhodopseudomonas palustris	1	Rhodopseudomonas palustris TIE-1
57507	2	16860	10838	Streptomyces sp.	1	Streptomyces sp. NRRL B-24720
57513	2	7191	4156	Comamonas aquatica	1	Comamonas aquatica DA1877
57514	2	10018	6217	Desulfotignum balticum	0.5	Desulfotignum balticum DSM 7044
57520	2	4803	2780	Kocuria rhizophila	1	Kocuria rhizophila TPW45
57526	2	6613	3764	Acinetobacter beijerinckii	1	Acinetobacter beijerinckii ANC 3835
57545	2	14318	8575	Rhizobium leguminosarum	1	Rhizobium leguminosarum bv. trifolii WSM597
57555	2	10635	6194	Agrobacterium fabrum	0.5	Agrobacterium fabrum str. C58
57567	2	8474	5334	Dolichospermum circinale	1	Dolichospermum circinale AWQC310F
57574	2	16290	9996	Streptomyces sp.	1	Streptomyces sp. NRRL B-3229
57583	2	9046	5264	Chromobacterium haemolyticum	1	Chromobacterium haemolyticum T124
57590	2	5026	3029	Oribacterium sp.	1	Oribacterium sp. oral taxon 078 str. F0263
57600	2	5540	3362	Prevotella ruminicola	0.5	Prevotella sp. RM4
57611	2	5337	3201	Prevotella saccharolytica	1	Prevotella saccharolytica JCM 17484
57613	2	5082	3080	Capnocytophaga granulosa	0.5	Capnocytophaga sp. CM59
57616	2	14109	8769	Rhizobium leguminosarum	1	Rhizobium leguminosarum bv. trifolii CC275e
57621	2	9115	5951	Plautia stali	0.5	Pantoea dispersa EGD-AAK13
57622	2	4496	2557	Leptotrichia goodfellowii	1	Leptotrichia goodfellowii F0264
57623	2	4234	2399	Corynebacterium jeikeium	1	Corynebacterium jeikeium K411
57624	2	12776	7242	Rhizobium sp.	1	Rhizobium sp. YR295
57625	2	5551	3504	Prevotella oulorum	1	Prevotella oulorum F0390
57631	2	7269	4293	Nonlabens ulvanivorans	1	Nonlabens ulvanivorans
57648	2	7254	4155	Acinetobacter baumannii	0.5	Acinetobacter pittii ANC 4052
57654	2	4056	2268	Prochlorococcus marinus	1	Prochlorococcus marinus str. MIT 9202
57656	2	4826	2907	Lachnospiraceae bacterium	1	Lachnospiraceae bacterium NK4A136
57659	2	12210	7249	Paenibacillus sp.	1	Paenibacillus sp. FSL R7-0331
57672	2	5105	2946	Actinomyces viscosus	0.5	Actinomyces viscosus C505
57676	2	5128	3024	Prevotella brevis	1	Prevotella brevis ATCC 19188
57678	2	9305	6076	Clostridium sordellii	1	Clostridium sordellii VPI 9048
57685	2	8350	5061	Bacillus marmarensis	0.5	Bacillus marmarensis DSM 21297
57689	2	6574	3884	Acinetobacter sp.	1	Acinetobacter sp. NIPH 298
57690	2	13921	8501	Rhizobium mesoamericanum	0.5	Rhizobium mesoamericanum STM3625
57695	2	10123	7492	Novosphingobium pentaromativorans	0.5	Novosphingobium sp. PP1Y
57696	2	6952	4188	Acinetobacter sp.	1	Acinetobacter sp. ANC 3862
57697	2	12664	7504	Pseudomonas fluorescens	0.5	Pseudomonas sp. FH1
57707	2	7258	4254	Pseudoalteromonas sp.	1	Pseudoalteromonas sp. BSi20311
57708	2	10978	6732	Clostridium termitidis	0.5	[Clostridium] cellobioparum DSM 1351 = ATCC 15832
57719	2	4188	2434	Streptococcus suis	1	Streptococcus suis 86-5192
57735	2	4024	2293	Actinomyces sp.	0.5	Actinomyces sp. oral taxon 172 str. F0311
57739	2	8426	5873	Bacteroides finegoldii	1	Bacteroides finegoldii DSM 17565
57741	2	5479	3152	Thioalkalivibrio sp.	1	Thioalkalivibrio sp. HL-Eb18
57743	2	8648	4847	Pantoea vagans	0.5	Pantoea sp. 9140
57749	2	5472	3204	Prevotella loescheii	0.5	Prevotella sp. oral taxon 472 str. F0295
57750	2	3817	2123	Streptococcus sp.	1	Streptococcus sp. I-P16
57758	2	6863	4039	Brevundimonas sp.	1	Brevundimonas sp. BAL3
57759	2	9299	5790	Pseudomonas pseudoalcaligenes	0.5	Pseudomonas pseudoalcaligenes CECT 5344
57760	2	5458	3118	Sulfurospirillum cavolei	0.5	Sulfurospirillum sp. MES
57791	2	3347	1890	Gemella sanguinis	1	Gemella sanguinis ATCC 700632
57793	2	4561	1570	Orientia tsutsugamushi	1	Orientia tsutsugamushi str. Boryong
57802	2	8765	5019	Leptospira interrogans	0.5	Leptospira interrogans serovar Copenhageni str. 200901383
57805	2	5691	2815	Methylophaga thiooxydans	1	Methylophaga thiooxydans DMS010
57811	2	8233	4459	Shewanella sp.	1	Shewanella sp. MR-7
57827	2	5307	3102	Clostridiales bacterium	0.5	Lachnospiraceae bacterium MSX33
57828	2	5217	3170	Leptotrichia hofstadii	1	Leptotrichia hofstadii F0254
57829	2	17765	12152	Streptomyces canus	0.5	Streptomyces sviceus ATCC 29083
57835	2	3727	2185	Peptoniphilus duerdenii	0.5	Peptoniphilus duerdenii ATCC BAA-1640
57843	2	9023	4953	Devosia sp.	1	Devosia sp. DBB001
57846	2	11577	6825	Pseudomonas sp.	1	Pseudomonas sp. UW4
57849	2	14525	9069	Streptomyces violens	0.5	Streptomyces violens
57869	2	5029	3177	Selenomonas bovis	1	Selenomonas bovis DSM 23594
57871	2	12074	7432	Streptomyces sulphureus	1	Streptomyces sulphureus DSM 40104
57875	2	11498	6986	Streptomyces seoulensis	0.5	Streptomyces sp. NRRL F-2799
57877	2	7536	4473	Acinetobacter sp.	1	Acinetobacter sp. NIPH 2036
57883	2	3973	2286	Streptococcus suis	1	Streptococcus suis TL13
57885	2	4443	2538	Streptococcus suis	1	Streptococcus suis 92-1400
57886	2	6547	3906	Sediminibacterium sp.	1	Sediminibacterium sp. OR43
57891	2	19771	13146	Streptomyces rapamycinicus	0.5	Streptomyces sp. PRh5
57893	2	3795	2051	Wohlfahrtiimonas chitiniclastica	1	Wohlfahrtiimonas chitiniclastica SH04
57894	2	16235	10902	Streptomyces monomycini	0.5	Streptomyces monomycini
57895	2	3889	2212	Streptococcus oralis	0.5	Streptococcus sp. CM6
57896	2	7785	4538	Vibrio metoecus	0.5	Vibrio sp. RC341
57897	2	13983	8468	Burkholderia bryophila	0.5	Burkholderia caledonica NBRC 102488
57899	2	3375	1832	Porphyromonas sp.	1	Porphyromonas sp. KLE 1280
57904	2	9830	5787	Citrobacter freundii	0.5	Citrobacter freundii CFNIH1
57921	2	5484	3058	Methylovorus glucosetrophus	0.5	Methylovorus glucosetrophus SIP3-4
57928	2	9739	5413	Pseudomonas mendocina	0.5	Pseudomonas alcaliphila 34
57934	2	14357	9556	Streptomyces sp.	1	Streptomyces sp. NRRL S-244
57935	2	4391	2607	Dermabacter hominis	0.5	Dermabacter sp. HFH0086
57936	2	13532	8733	Rhodopirellula europaea	1	Rhodopirellula europaea SH398
57938	2	4356	2432	Rothia dentocariosa	1	Rothia dentocariosa M567
57947	2	15007	9688	Vibrio variabilis	0.5	Vibrio variabilis
57952	2	1242	651	Blattabacterium sp.	1	Blattabacterium sp. (Periplaneta americana) str. BPLAN
57984	2	3002	1864	Rickettsia australis	0.5	Rickettsia akari str. Hartford
57986	2	4318	2758	Streptococcus suis	1	Streptococcus suis S28
57989	2	8789	6232	Polaribacter irgensii	0.5	Polaribacter irgensii 23-P
57991	2	9808	6235	Vibrio tasmaniensis	1	Vibrio tasmaniensis 5F-79
57999	2	4402	2510	Aggregatibacter actinomycetemcomitans	1	Aggregatibacter actinomycetemcomitans RhAA1
58004	2	10595	6800	Geomicrobium sp.	1	Geomicrobium sp. JCM 19038
58015	2	8531	4771	Bradyrhizobiaceae bacterium	0.5	Afipia clevelandensis ATCC 49720
58017	2	3570	2174	Aerococcus viridans	0.5	Aerococcus viridans LL1
58019	2	10536	5945	Pseudovibrio sp.	1	Pseudovibrio sp. FO-BEG1
58031	2	3688	2050	Thermotoga naphthophila	0.5	Thermotoga petrophila RKU-1
58041	2	10680	6263	Pseudomonas sp.	1	Pseudomonas sp. R62
58043	2	10979	6450	Pseudomonas putida	1	Pseudomonas putida NBRC 14164
58044	2	3948	2351	Anaerococcus hydrogenalis	1	Anaerococcus hydrogenalis DSM 7454
58045	2	14259	8913	Nocardia cerradoensis	0.5	Nocardia aobensis NBRC 100429
58051	2	3760	2217	Anaerococcus obesiensis	0.5	Anaerococcus obesiensis ph10
58071	2	8070	4700	Geobacter bremensis	0.5	Geobacter bemidjiensis Bem
58077	2	4706	2843	Oribacterium sp.	1	Oribacterium sp. oral taxon 108 str. F0425
58082	2	5703	3466	Caldicellulosiruptor kronotskyensis	0.5	Caldicellulosiruptor kronotskyensis 2002
58083	2	9705	6340	Methylosinus sp.	1	Methylosinus sp. LW4
58097	2	8495	4935	Aeromonas allosaccharophila	1	Aeromonas allosaccharophila BVH88
58103	2	10486	6194	Massilia alkalitolerans	0.5	Massilia sp. LC238
58107	2	4828	2887	Streptococcus suis	1	Streptococcus suis YS74
58120	2	5907	3877	Clostridiales bacterium	0.5	[Clostridium] saccharogumia DSM 17460
58124	2	5956	3712	Prochlorococcus marinus	1	Prochlorococcus marinus str. MIT 9303
58133	2	4473	2485	Streptococcus suis	1	Streptococcus suis YS23-2
58136	2	3415	1948	Porphyromonas catoniae	1	Porphyromonas catoniae F0037
58138	2	6891	4494	Candidatus Prevotella	0.5	Prevotella sp. oral taxon 317 str. F0108
58144	2	3517	2044	Rothia mucilaginosa	1	Rothia mucilaginosa M508
58164	2	10504	6532	Paenibacillus peoriae	0.5	Paenibacillus peoriae KCTC 3763
58167	2	11444	6654	Pseudomonas fluorescens	0.5	Pseudomonas fluorescens SF4c
58171	2	14382	8627	Rhizobium leguminosarum	1	Rhizobium leguminosarum bv. viciae TOM
58173	2	14611	9758	Streptomyces aureofaciens	0.5	Streptomyces violaceorubidus
58184	2	3843	2282	Veillonella parvula	1	Veillonella parvula HSIVP1
58185	2	6012	3706	[Clostridium] mangenotii	1	[Clostridium] mangenotii TR
58198	2	15153	10255	Rhizobium gallicum	0.5	Rhizobium mongolense USDA 1844
58204	2	10916	6650	Geomicrobium sp.	1	Geomicrobium sp. JCM 19039
58208	2	7886	4714	Methylocystis rosea	0.5	Methylocystis rosea SV97
58210	2	9706	5514	Serratia liquefaciens	1	Serratia liquefaciens ATCC 27592
58216	2	3308	1891	Helicobacter pylori	1	Helicobacter pylori NQ4216
58221	2	14812	9121	Bradyrhizobium sp.	1	Bradyrhizobium sp. URHA0013
58222	2	4498	2651	Mannheimia granulomatis	0.5	Mannheimia granulomatis DSM 19156
58225	2	9530	5634	Chryseobacterium sp.	1	Chryseobacterium sp. JM1
58226	2	10182	5896	Xanthobacter sp.	1	Xanthobacter sp. 126
58230	2	10613	6402	Agrobacterium tumefaciens	1	Agrobacterium tumefaciens str. Cherry 2E-2-2
58242	2	14514	10658	Kitasatospora phosalacinea	1	Kitasatospora phosalacinea
58244	2	7414	4370	Acinetobacter sp.	1	Acinetobacter sp. ANC 4105
58246	2	5490	3235	Caldicellulosiruptor saccharolyticus	0.5	Caldicellulosiruptor saccharolyticus DSM 8903
58247	2	3579	2044	Streptococcus sp.	1	Streptococcus sp. M143
58250	2	14331	9621	Streptomyces sp.	1	Streptomyces sp. FxanaC1
58254	2	3517	2183	Bacteroides ureolyticus	0.5	Campylobacter ureolyticus
58258	2	20858	14662	Streptomyces prunicolor	0.5	Streptomyces prunicolor NBRC 13075
58264	2	8732	4953	Pantoea sp.	1	Pantoea sp. NGS-ED-1003
58267	2	12095	7335	Pseudomonas mandelii	0.5	Pseudomonas sp. GM41(2012)
58268	2	11096	6588	Pseudomonas sp.	1	Pseudomonas sp. RIT288
58275	2	3290	1834	Helicobacter pylori	1	Helicobacter pylori G27
58276	2	10379	6861	Paenibacillus zanthoxyli	0.5	Paenibacillus azotofixans ATCC 35681
58277	2	4159	2540	Streptococcus suis	1	Streptococcus suis YS16
58280	2	5268	2955	Psychrobacter cryohalolentis	0.5	Psychrobacter cryohalolentis K5
58283	2	5199	3123	Selenomonas ruminantium	0.5	Selenomonas ruminantium AC2024
58284	2	4204	2444	Streptococcus suis	1	Streptococcus suis D12
58288	2	3581	2044	Streptococcus mitis	1	Streptococcus mitis NCTC 12261
58289	2	2382	1413	Gardnerella vaginalis	1	Gardnerella vaginalis 1500E
58290	2	4156	2454	Streptococcus suis	1	Streptococcus suis 8830
58293	2	6202	3891	Clavibacter michiganensis	0.5	Clavibacter cf. michiganensis LMG 26808
58299	2	4406	2747	Streptococcus agalactiae	0.5	Streptococcus agalactiae LMG 14747
58300	2	3482	2006	Actinomyces graevenitzii	1	Actinomyces graevenitzii C83
58301	1	1762	1685	Streptococcus phocae	1	Streptococcus phocae C-4
58302	1	1517	1509	Megasphaera sp.	1	Megasphaera sp. UPII 135-E
58303	1	1875	1867	Streptococcus anginosus	1	Streptococcus anginosus SK52 = DSM 20563
58304	1	1962	1949	Streptococcus mitis	1	Streptococcus mitis bv. 2 str. SK95
58305	1	4124	4094	Cryobacterium roopkundense	1	Cryobacterium roopkundense RuG17
58306	1	7444	7335	Vibrio sp.	1	Vibrio sp. C7
58307	1	2508	2492	Psychrobacter sp.	1	Psychrobacter sp. 1501(2011)
58308	1	2480	2474	Prevotella stercorea	1	Prevotella stercorea DSM 18206
58309	1	1436	1434	Candidatus Pelagibacter	1	Candidatus Pelagibacter sp. IMCC9063
58310	1	1964	1920	Helicobacter bizzozeronii	1	Helicobacter bizzozeronii CIII-1
58311	1	2516	2444	Helicobacter bizzozeronii	1	Helicobacter bizzozeronii CCUG 35545
58312	1	7229	7166	Streptomyces cattleya	1	Streptomyces cattleya NRRL 8057 = DSM 46488
58313	1	3274	3267	Mesoflavibacter zeaxanthinifaciens	1	Mesoflavibacter zeaxanthinifaciens S86
58314	1	4853	4747	Photorhabdus temperata	1	Photorhabdus temperata subsp. khanii NC19
58315	1	3961	3924	Alteromonas macleodii	1	Alteromonas macleodii str. 'Black Sea 11'
58316	1	4638	4617	Collimonas fungivorans	1	Collimonas fungivorans Ter331
58317	1	607	607	Buchnera aphidicola	1	Buchnera aphidicola str. Ak (Acyrthosiphon kondoi)
58318	1	5684	5662	Pseudomonas putida	1	Pseudomonas putida CSV86
58319	1	1971	1959	Streptococcus oralis	1	Streptococcus oralis SK255
58320	1	1745	1738	Streptococcus infantis	1	Streptococcus infantis SK1076
58321	1	3862	3828	Planococcus halocryophilus	1	Planococcus halocryophilus Or1
58322	1	4628	4565	Trabulsiella guamensis	1	Trabulsiella guamensis ATCC 49490
58323	1	4550	4518	Kluyvera ascorbata	1	Kluyvera ascorbata ATCC 33433
58324	1	4349	4343	Buttiauxella agrestis	1	Buttiauxella agrestis ATCC 33320
58325	1	0	0	Acetobacter pasteurianus	1	Acetobacter pasteurianus NBRC 101655
58326	1	3057	3032	Oscillibacter ruminantium	1	Oscillibacter ruminantium GH1
58327	1	7443	7412	Paenibacillus elgii	1	Paenibacillus elgii B69
58328	1	3706	3673	Pusillimonas sp.	1	Pusillimonas sp. T7-7
58329	1	1350	1349	gamma proteobacterium	1	gamma proteobacterium SCGC AAA076-P13
58330	1	1956	1915	Streptococcus mitis	1	Streptococcus mitis SK1073
58331	1	1822	1797	Streptococcus mitis	1	Streptococcus mitis SK1080
58332	1	2993	2985	Myroides injenensis	1	Myroides injenensis M09-0166
58333	1	2433	2411	Acetonema longum	1	Acetonema longum DSM 6540
58334	1	1355	1355	gamma proteobacterium	1	gamma proteobacterium SCGC AAA168-P09
58335	1	2213	2209	alpha proteobacterium	1	alpha proteobacterium SCGC AAA536-G10
58336	1	2117	2108	alpha proteobacterium	1	alpha proteobacterium SCGC AAA536-K22
58337	1	6155	6125	Burkholderia cepacia	1	Burkholderia cepacia GG4
58338	1	4981	4967	Comamonas testosteroni	1	Comamonas testosteroni ATCC 11996
58339	1	5510	5481	Xenococcus sp.	1	Xenococcus sp. PCC 7305
58340	1	6378	5898	Geitlerinema sp.	1	Geitlerinema sp. PCC 7105
58341	1	8837	8137	Leptolyngbya sp.	1	Leptolyngbya sp. PCC 7375
58342	1	3968	3913	Gloeocapsa sp.	1	Gloeocapsa sp. PCC 73106
58343	1	1748	1736	Helicobacter pylori	1	Helicobacter pylori N6
58344	1	3134	3122	Methylophaga aminisulfidivorans	1	Methylophaga aminisulfidivorans MP
58345	1	5211	4737	Endozoicomonas montiporae	1	Endozoicomonas montiporae
58346	1	6356	6306	Neorhizobium galegae	1	Neorhizobium galegae bv. orientalis str. HAMBI 540
58347	1	6306	6270	Neorhizobium galegae	1	Neorhizobium galegae bv. officinalis bv. officinalis str. HAMBI 1141
58348	1	1958	1762	Haemophilus haemolyticus	1	Haemophilus haemolyticus M19107
58349	1	1829	1741	Haemophilus haemolyticus	1	Haemophilus haemolyticus M19501
58350	1	1949	1913	Haemophilus haemolyticus	1	Haemophilus haemolyticus M21127
58351	1	1994	1759	Haemophilus haemolyticus	1	Haemophilus haemolyticus M21621
58352	1	2500	2360	Haemophilus haemolyticus	1	Haemophilus haemolyticus M21639
58353	1	7766	7592	Frankia sp.	1	Frankia sp. EUN1f
58354	1	5612	5538	Pseudomonas sp.	1	Pseudomonas sp. StFLB209
58355	1	3632	3592	Acinetobacter sp.	1	Acinetobacter sp. P8-3-8
58356	1	3946	3938	Sphingomonas sp.	1	Sphingomonas sp. KC8
58357	1	2534	2517	Neisseria wadsworthii	1	Neisseria wadsworthii 9715
58358	1	2446	2437	Caloramator sp.	1	Caloramator sp. ALD01
58359	1	1494	1486	Campylobacter lari	1	Campylobacter lari subsp. concheus LMG 11760
58360	1	1483	1479	Campylobacter insulaenigrae	1	Campylobacter insulaenigrae NCTC 12927
58361	1	5268	5194	Microlunatus phosphovorus	1	Microlunatus phosphovorus NM-1
58362	1	2370	2320	Neisseria shayeganii	1	Neisseria shayeganii 871
58363	1	2769	2760	Alistipes sp.	1	Alistipes sp. JC136
58364	1	3301	3286	Alistipes senegalensis	1	Alistipes senegalensis JC50
58365	1	1740	1736	Anaerococcus senegalensis	1	Anaerococcus senegalensis JC48
58366	1	4681	4669	Bacillus sp.	1	Bacillus sp. 10403023
58367	1	3054	3046	Brevibacterium sp.	1	Brevibacterium sp. JC43
58368	1	3693	3667	Clostridium sp.	1	Clostridium sp. JC122
58369	1	3180	3161	Kurthia sp.	1	Kurthia sp. JC30
58370	1	3031	3021	Kurthia sp.	1	Kurthia sp. JC8E
58371	1	5330	5295	Paenibacillus sp.	1	Paenibacillus sp. JC66
58372	1	1742	1739	Peptoniphilus sp.	1	Peptoniphilus sp. JC140
58373	1	4108	3672	Salinisphaera shabanensis	1	Salinisphaera shabanensis E1L3A
58374	1	3874	2949	Haloplasma contractile	1	Haloplasma contractile SSD-17B
58375	1	1973	1963	Coriobacteriaceae bacterium	1	Coriobacteriaceae bacterium JC110
58376	1	3423	3404	Clostridiaceae bacterium	1	Clostridiaceae bacterium JC13
58377	1	5047	5002	Bacillus massiliosenegalensis	1	Bacillus massiliosenegalensis JC6
58378	1	6045	6003	Paenibacillus sp.	1	Paenibacillus sp. HW567
58379	1	3311	3213	Flavobacterium branchiophilum	1	Flavobacterium branchiophilum
58380	1	4905	4850	Legionella sp.	1	Legionella sp. LegM
58381	1	1870	1866	Streptococcus parasanguinis	1	Streptococcus parasanguinis SK236
58382	1	1817	1796	Streptococcus mitis	1	Streptococcus mitis SK569
58383	1	2404	2386	Haemophilus pittmaniae	1	Haemophilus pittmaniae HK 85
58384	1	2112	2097	Streptococcus infantis	1	Streptococcus infantis SK970
58385	1	3188	3184	Brevundimonas diminuta	1	Brevundimonas diminuta 470-4
58386	1	3023	3007	Capnocytophaga sp.	1	Capnocytophaga sp. oral taxon 326 str. F0382
58387	1	2582	2576	Corynebacterium durum	1	Corynebacterium durum F0235
58388	1	2014	2009	Prevotella sp.	1	Prevotella sp. oral taxon 473 str. F0040
58389	1	6651	6595	Dehalobacter sp.	1	Dehalobacter sp. FTH1
58390	1	4541	4509	Advenella kashmirensis	1	Advenella kashmirensis WT001
58391	1	2335	2328	Idiomarina sp.	1	Idiomarina sp. A28L
58392	1	6694	6552	Nostoc sp.	1	Nostoc sp. PCC 7120
58393	1	9446	9423	Saccharothrix syringae	1	Saccharothrix syringae
58394	1	5305	5265	Azorhizobium doebereinerae	1	Azorhizobium doebereinerae UFLA1-100
58395	1	7824	7766	Bradyrhizobium elkanii	1	Bradyrhizobium elkanii WSM1741
58396	1	9867	9702	Bradyrhizobium elkanii	1	Bradyrhizobium elkanii WSM2783
58397	1	8562	8496	Bradyrhizobium japonicum	1	Bradyrhizobium japonicum USDA 124
58398	1	7732	7469	Bradyrhizobium japonicum	1	Bradyrhizobium japonicum USDA 135
58399	1	7978	7903	Bradyrhizobium japonicum	1	Bradyrhizobium japonicum WSM1743
58400	1	8534	8481	Bradyrhizobium japonicum	1	Bradyrhizobium japonicum WSM2793
58401	1	8593	8499	Bradyrhizobium sp.	1	Bradyrhizobium sp. WSM3983
58402	1	5701	5668	Pseudomonas fluorescens	1	Pseudomonas fluorescens Q2-87
58403	1	5910	5891	Pseudomonas frederiksbergensis	1	Pseudomonas frederiksbergensis SI8
58404	1	6157	6106	Cupriavidus taiwanensis	1	Cupriavidus taiwanensis STM 6070
58405	1	6712	6669	Mesorhizobium ciceri	1	Mesorhizobium ciceri WSM4083
58406	1	7457	7402	Mesorhizobium loti	1	Mesorhizobium loti CJ3sym
58407	1	6920	6861	Mesorhizobium loti	1	Mesorhizobium loti USDA 3471
58408	1	7035	6970	Mesorhizobium sp.	1	Mesorhizobium sp. WSM3224
58409	1	6249	6196	Mesorhizobium sp.	1	Mesorhizobium sp. WSM3626
58410	1	8239	8176	Mesorhizobium sp.	1	Mesorhizobium sp. WSM4349
58411	1	3651	3623	Acetobacter tropicalis	1	Acetobacter tropicalis
58412	1	6793	6742	Rhizobium giardinii	1	Rhizobium giardinii bv. giardinii H152
58413	1	7807	7745	Rhizobium sullae	1	Rhizobium sullae WSM1592
58414	1	6747	6683	Rhizobium leucaenae	1	Rhizobium leucaenae USDA 9039
58415	1	6681	6633	Sinorhizobium meliloti	1	Sinorhizobium meliloti 4H41
58416	1	6206	6176	Sinorhizobium terangae	1	Sinorhizobium terangae WSM1721
58417	1	1412	1406	Candidatus Arthromitus	1	Candidatus Arthromitus sp. SFB-rat-Yit
58418	1	2812	2696	Flavobacterium columnare	1	Flavobacterium columnare ATCC 49512
58419	1	2697	2659	Clostridium sp.	1	Clostridium sp. SY8519
58420	1	3960	3934	Marinobacterium stanieri	1	Marinobacterium stanieri S30
58421	1	2868	2860	Flavobacteriaceae bacterium	1	Flavobacteriaceae bacterium S85
58422	1	3193	3191	Alteromonas sp.	1	Alteromonas sp. S89
58423	1	4370	4366	Oceanicola sp.	1	Oceanicola sp. S124
58424	1	3142	3138	Serinicoccus profundi	1	Serinicoccus profundi MCCC 1A05965
58425	1	2770	2767	Lysinimicrobium mangrovi	1	Lysinimicrobium mangrovi NBRC 105856
58426	1	3392	3389	Erythrobacter longus	1	Erythrobacter longus
58427	1	5359	5035	Erwinia tracheiphila	1	Erwinia tracheiphila PSU-1
58428	1	1853	1830	Oenococcus kitaharae	1	Oenococcus kitaharae DSM 17330
58429	1	3073	3058	Citricoccus sp.	1	Citricoccus sp. CH26A
58430	1	3153	3140	Pseudoxanthomonas spadix	1	Pseudoxanthomonas spadix BD-a59
58431	1	2911	2898	Brachyspira intermedia	1	Brachyspira intermedia PWS/A
58432	1	4707	4669	Serratia sp.	1	Serratia sp. ATCC 39006
58433	1	1968	1962	Lactobacillus malefermentans	1	Lactobacillus malefermentans KCTC 3548
58434	1	2534	2522	Lactobacillus suebicus	1	Lactobacillus suebicus KCTC 3549
58435	1	2642	2621	Lactobacillus mali	1	Lactobacillus mali KCTC 3596 = DSM 20444
58436	1	2958	2938	Lactobacillus zeae	1	Lactobacillus zeae KCTC 3804
58437	1	2354	2341	Lactobacillus versmoldensis	1	Lactobacillus versmoldensis KCTC 3814
58438	1	2262	2256	Lactobacillus acidipiscis	1	Lactobacillus acidipiscis KCTC 13900
58439	1	3045	3039	Bizionia argentinensis	1	Bizionia argentinensis JUB59
58440	1	3682	3610	Marinobacter lipolyticus	1	Marinobacter lipolyticus BF04_CF-4
58441	1	2100	2030	SAR406 cluster	1	SAR406 cluster bacterium JGI 0000039-D08
58442	1	2761	2718	Leptospirillum ferriphilum	1	Leptospirillum ferriphilum ML-04
58443	1	5236	5200	Sporichthya polymorpha	1	Sporichthya polymorpha DSM 43042
58444	1	3143	3002	Alicyclobacillus acidocaldarius	1	Alicyclobacillus acidocaldarius subsp. acidocaldarius Tc-4-1
58445	1	4887	4861	Anditalea andensis	1	Anditalea andensis
58446	1	5573	5221	Leptospira alexanderi	1	Leptospira alexanderi serovar Manhao 3 str. L 60
58447	1	4845	4811	Leptospira broomii	1	Leptospira broomii serovar Hurstbridge str. 5399
58448	1	4897	4874	Leptospira kmetyi	1	Leptospira kmetyi serovar Malaysia str. Bejo-Iso9
58449	1	1791	1729	Allobaculum stercoricanis	1	Allobaculum stercoricanis DSM 13633
58450	1	4021	3983	Actinopolyspora mortivallis	1	Actinopolyspora mortivallis DSM 44261
58451	1	5238	5191	Agrobacterium tumefaciens	1	Agrobacterium tumefaciens F2
58452	1	2314	2304	Propionibacterium acnes	1	Propionibacterium acnes SK182B-JCVI
58453	1	4522	4505	Vibrio splendidus	1	Vibrio splendidus ATCC 33789
58454	1	2203	2186	Streptococcus equi	1	Streptococcus equi subsp. ruminatorum CECT 5772
58455	1	5001	4975	Sphingobium sp.	1	Sphingobium sp. KK22
58456	1	7607	7581	Streptacidiphilus neutrinimicus	1	Streptacidiphilus neutrinimicus NBRC 100921
58457	1	0	0	Acetobacteraceae bacterium	1	Acetobacteraceae bacterium AT-5844
58458	1	7463	7439	Streptacidiphilus carbonis	1	Streptacidiphilus carbonis NBRC 100919
58459	1	2242	2142	Streptococcus pseudopneumoniae	1	Streptococcus pseudopneumoniae IS7493
58460	1	6895	6871	Streptomyces purpureus	1	Streptomyces purpureus KA281
58461	1	7996	7961	Streptomyces bottropensis	1	Streptomyces bottropensis ATCC 25435
58462	1	4759	4744	Comamonas sp.	1	Comamonas sp. B-9
58463	1	5687	4810	Candidatus Burkholderia	1	Candidatus Burkholderia kirkii UZHbot1
58464	1	1663	1629	Helicobacter pylori	1	Helicobacter pylori ELS37
58465	1	3429	3357	Nitrosococcus watsonii	1	Nitrosococcus watsonii C-113
58466	1	4960	4936	Photobacterium sp.	1	Photobacterium sp. AK15
58467	1	5003	4992	Grimontia sp.	1	Grimontia sp. AK16
58468	1	2677	2528	Morococcus cerebrosus	1	Morococcus cerebrosus CIP 81.93
58469	1	8177	8105	Nocardia sp.	1	Nocardia sp. BMG51109
58470	1	3433	3416	Brachybacterium paraconglomeratum	1	Brachybacterium paraconglomeratum LC44
58471	1	7024	6934	Ensifer adhaerens	1	Ensifer adhaerens
58472	1	0	0	Acetobacterium dehalogenans	1	Acetobacterium dehalogenans DSM 11527
58473	1	8624	8597	Amycolatopsis nigrescens	1	Amycolatopsis nigrescens CSC17Ta-90
58474	1	1938	1923	Succinispira mobilis	1	Succinispira mobilis DSM 6222
58475	1	2892	2883	Sporolactobacillus inulinus	1	Sporolactobacillus inulinus CASD
58476	1	3737	3725	Bdellovibrio bacteriovorus	1	Bdellovibrio bacteriovorus str. Tiberius
58477	1	5374	5351	Pedobacter kyungheensis	1	Pedobacter kyungheensis KACC 16221
58478	1	2000	1904	Candidatus Glomeribacter	1	Candidatus Glomeribacter gigasporarum BEG34
58479	1	4334	4316	Enterobacter cloacae	1	Enterobacter cloacae IIT-BT 08
58480	1	4123	4103	Bacillus sp.	1	Bacillus sp. MSP13
58481	1	4896	4868	Bacillus sp.	1	Bacillus sp. NSP9.1
58482	1	6386	6364	Burkholderia grimmiae	1	Burkholderia grimmiae
58483	1	3794	3769	Halomonas boliviensis	1	Halomonas boliviensis LC1
58484	1	1692	1683	Basilea psittacipulmonis	1	Basilea psittacipulmonis DSM 24701
58485	1	2520	2504	Campylobacter showae	1	Campylobacter showae CC57C
58486	1	2440	2392	Eikenella corrodens	1	Eikenella corrodens CC92I
58487	1	2116	2071	Streptococcus parasanguinis	1	Streptococcus parasanguinis CC87K
58488	1	4113	4096	Aeromonas veronii	1	Aeromonas veronii AMC34
58489	1	3735	3725	Gordonia araii	1	Gordonia araii NBRC 100433
58490	1	4518	4496	Cronobacter condimenti	1	Cronobacter condimenti 1330
58491	1	4324	4272	Cronobacter universalis	1	Cronobacter universalis NCTC 9529
58492	1	2431	2430	Lactobacillus heilongjiangensis	1	Lactobacillus heilongjiangensis DSM 28069
58493	1	2860	2841	Brachybacterium squillarum	1	Brachybacterium squillarum M-6-3
58494	1	4721	4714	Gordonia amarae	1	Gordonia amarae NBRC 15530
58495	1	5562	5479	Janthinobacterium sp.	1	Janthinobacterium sp. CG3
58496	1	4844	4794	Methylomonas sp.	1	Methylomonas sp. LW13
58497	1	3601	3587	Rhodanobacter sp.	1	Rhodanobacter sp. OR444
58498	1	5274	5245	Pantoea rodasii	1	Pantoea rodasii ND03
58499	1	3937	3911	Pantoea rwandensis	1	Pantoea rwandensis ND04
58500	1	3023	2954	Thiolapillus brandeum	1	Thiolapillus brandeum Hiromi 1
58501	1	2020	1960	Streptococcus lutetiensis	1	Streptococcus lutetiensis 033
58502	1	3178	3155	Dietzia alimentaria	1	Dietzia alimentaria 72
58503	1	4872	4711	Bacteroides faecis	1	Bacteroides faecis MAJ27
58504	1	4456	4441	Arthrobacter globiformis	1	Arthrobacter globiformis NBRC 12137
58505	1	4516	4506	Gordonia effusa	1	Gordonia effusa NBRC 100432
58506	1	4799	4782	Gordonia rubripertincta	1	Gordonia rubripertincta NBRC 101908
58507	1	4348	4340	Mycobacterium avium	1	Mycobacterium avium subsp. avium Env 77
58508	1	4620	4612	Mycobacterium thermoresistibile	1	Mycobacterium thermoresistibile ATCC 19527
58509	1	2303	2266	Staphylococcus sp.	1	Staphylococcus sp. HGB0015
58510	1	3477	3458	Paenisporosarcina sp.	1	Paenisporosarcina sp. HGH0030
58511	1	8623	8476	Streptomyces sp.	1	Streptomyces sp. HGB0020
58512	1	2134	2111	Corynebacterium sp.	1	Corynebacterium sp. HFH0082
58513	1	4680	4559	Methylovulum miyakonense	1	Methylovulum miyakonense HT12
58514	1	7997	7985	Streptomyces chartreusis	1	Streptomyces chartreusis NRRL 12338
58515	1	4921	4910	Citrobacter sp.	1	Citrobacter sp. S-77
58516	1	10065	9959	Burkholderia sp.	1	Burkholderia sp. UYPR1.413
58517	1	7278	7206	Cupriavidus sp.	1	Cupriavidus sp. UYPR2.512
58518	1	3805	3803	Sphingomonas elodea	1	Sphingomonas elodea ATCC 31461
58519	1	1374	1374	Candidatus Aquiluna	1	Candidatus Aquiluna sp. IMCC13023
58520	1	3487	3459	Lonsdalea quercina	1	Lonsdalea quercina subsp. quercina
58521	1	3898	3869	Pelagibacterium halotolerans	1	Pelagibacterium halotolerans B2
58522	1	4960	4939	Agrobacterium tumefaciens	1	Agrobacterium tumefaciens CCNWGS0286
58523	1	6972	6938	Mesorhizobium amorphae	1	Mesorhizobium amorphae CCNWGS0123
58524	1	3637	3632	Glaciecola nitratireducens	1	Glaciecola nitratireducens FR1064
58525	1	3507	3496	Flavobacterium frigoris	1	Flavobacterium frigoris PS1
58526	1	2214	2206	Commensalibacter intestini	1	Commensalibacter intestini A911
58527	1	2847	2820	Gluconobacter morbifer	1	Gluconobacter morbifer G707
58528	1	4675	4659	Gordonia sputi	1	Gordonia sputi NBRC 100414
58529	1	3126	3118	Mobilicoccus pelagius	1	Mobilicoccus pelagius NBRC 104925
58530	1	8165	8114	Amycolatopsis benzoatilytica	1	Amycolatopsis benzoatilytica AK 16/65
58531	1	9964	9895	Amycolatopsis balhimycina	1	Amycolatopsis balhimycina FH 1894
58532	1	5261	5230	Actinopolyspora halophila	1	Actinopolyspora halophila DSM 43834
58533	1	5269	5241	Rudanella lutea	1	Rudanella lutea DSM 19387
58534	1	3895	3813	Thermicanus aegyptius	1	Thermicanus aegyptius DSM 12793
58535	1	3231	3198	Haloglycomyces albus	1	Haloglycomyces albus DSM 45210
58536	1	2774	2770	Salisaeta longa	1	Salisaeta longa DSM 21114
58537	1	5287	5256	Geminicoccus roseus	1	Geminicoccus roseus DSM 18922
58538	1	3856	3829	Rhodovibrio salinarum	1	Rhodovibrio salinarum DSM 9154
58539	1	3306	3173	Thermacetogenium phaeum	1	Thermacetogenium phaeum DSM 12270
58540	1	3678	3639	Sphingomonas phyllosphaerae	1	Sphingomonas phyllosphaerae 5.2
58541	1	3581	3561	Sphingomonas phyllosphaerae	1	Sphingomonas phyllosphaerae FA2
58542	1	2744	2703	Flavobacterium indicum	1	Flavobacterium indicum GPTSA100-9 = DSM 17447
58543	1	1572	1538	Bartonella australis	1	Bartonella australis Aust/NH1
58544	1	1472	1396	Bartonella bovis	1	Bartonella bovis m02
58545	1	1671	1513	Bartonella schoenbuchensis	1	Bartonella schoenbuchensis m07a
58546	1	1508	1493	Bartonella alsatica	1	Bartonella alsatica IBS 382
58547	1	1953	1864	Bartonella rattimassiliensis	1	Bartonella rattimassiliensis 15908
58548	1	1377	1356	Bartonella melophagi	1	Bartonella melophagi K-2C
58549	1	1839	1759	Bartonella taylorii	1	Bartonella taylorii 8TBB
58550	1	2112	1929	Bartonella sp.	1	Bartonella sp. DB5-6
58551	1	6560	6252	Prochloron didemni	1	Prochloron didemni P4-Papua_New_Guinea
58552	1	4152	4129	Marinobacter manganoxydans	1	Marinobacter manganoxydans MnI7-9
58553	1	4909	4752	Methylobacter luteus	1	Methylobacter luteus IMV-B-3098
58554	1	1806	1798	Streptococcus sp.	1	Streptococcus sp. SK140
58555	1	1758	1751	Streptococcus sp.	1	Streptococcus sp. SK643
58556	1	1853	1839	Streptococcus mitis	1	Streptococcus mitis SK616
58557	1	1903	1892	Streptococcus mitis	1	Streptococcus mitis SK575
58558	1	1863	1854	Streptococcus mitis	1	Streptococcus mitis SK579
58559	1	1834	1824	Streptococcus oralis	1	Streptococcus oralis SK10
58560	1	1861	1848	Streptococcus oralis	1	Streptococcus oralis SK100
58561	1	1865	1861	Streptococcus oralis	1	Streptococcus oralis SK610
58562	1	1735	1730	Haemophilus haemolyticus	1	Haemophilus haemolyticus HK386
58563	1	1994	1988	Haemophilus paraphrohaemolyticus	1	Haemophilus paraphrohaemolyticus HK411
58564	1	1972	1965	Haemophilus parahaemolyticus	1	Haemophilus parahaemolyticus HK385
58565	1	2172	2159	Pasteurella bettyae	1	Pasteurella bettyae CCUG 2042
58566	1	2510	2462	Prevotella sp.	1	Prevotella sp. oral taxon 306 str. F0472
58567	1	2993	2990	Cellulomonas sp.	1	Cellulomonas sp. JC225
58568	1	4680	4665	Enterobacter sp.	1	Enterobacter sp. JC163
58569	1	4051	4043	Herbaspirillum sp.	1	Herbaspirillum sp. JC206
58570	1	1895	1885	Peptoniphilus timonensis	1	Peptoniphilus timonensis JC401
58571	1	3649	3628	Ruminococcus sp.	1	Ruminococcus sp. JC304
58572	1	2671	2669	Sanguibacter sp.	1	Sanguibacter sp. JC301
58573	1	5888	5873	Methylobacterium sp.	1	Methylobacterium sp. GXF4
58574	1	3363	3356	Arthrobacter sp.	1	Arthrobacter sp. PAO19
58575	1	1469	1469	Candidatus Pelagibacter	1	Candidatus Pelagibacter ubique HIMB083
58576	1	4622	4526	Novosphingobium lindaniclasticum	1	Novosphingobium lindaniclasticum LE124
58577	1	4413	4410	Patulibacter sp.	1	Patulibacter sp. I11
58578	1	3375	3366	Limnohabitans sp.	1	Limnohabitans sp. Rim28
58579	1	2869	2869	Limnohabitans sp.	1	Limnohabitans sp. Rim47
58580	1	4666	4550	Arthrobacter sp.	1	Arthrobacter sp. MA-N2
58581	1	4190	4091	Paracoccus sp.	1	Paracoccus sp. N5
58582	1	4260	4178	Methylopila sp.	1	Methylopila sp. M107
58583	1	4724	4705	Methylobacterium sp.	1	Methylobacterium sp. 10
58584	1	4414	4391	Methylobacterium sp.	1	Methylobacterium sp. 77
58585	1	2371	2356	Methylotenera versatilis	1	Methylotenera versatilis 7
58586	1	4086	4084	Nocardioides sp.	1	Nocardioides sp. CF8
58587	1	4883	4850	Poribacteria bacterium	1	Poribacteria bacterium WGA-3G
58588	1	3041	3034	Gluconobacter frateurii	1	Gluconobacter frateurii NBRC 101659
58589	1	1899	1897	Actinomyces sp.	1	Actinomyces sp. ICM39
58590	1	3198	3192	Paenirhodobacter enshiensis	1	Paenirhodobacter enshiensis
58591	1	2858	2835	Synechococcus sp.	1	Synechococcus sp. CC9605
58592	1	2964	2946	Synechococcus sp.	1	Synechococcus sp. CC9616
58593	1	3111	3094	Flavobacterium enshiense	1	Flavobacterium enshiense DK69
58594	1	7017	6957	Mesorhizobium alhagi	1	Mesorhizobium alhagi CCNWXJ12-2
58595	1	4956	4945	Gordonia otitidis	1	Gordonia otitidis NBRC 100426
58596	1	5966	5933	Gordonia rhizosphera	1	Gordonia rhizosphera NBRC 16068
58597	1	3873	3867	Pseudomonas stutzeri	1	Pseudomonas stutzeri SDM-LAC
58598	1	5899	5879	Tistrella mobilis	1	Tistrella mobilis KA081020-065
58599	1	2241	2216	Thermus sp.	1	Thermus sp. CCB_US3_UF1
58600	1	1913	1861	Clostridiales bacterium	1	Clostridiales bacterium BV3C26
58601	1	1619	1613	Coriobacteriaceae bacterium	1	Coriobacteriaceae bacterium BV3Ac1
58602	1	2262	2249	Megasphaera sp.	1	Megasphaera sp. BV3C16-1
58603	1	3476	3444	Alicyclobacillus pomorum	1	Alicyclobacillus pomorum DSM 14955
58604	1	5119	4985	Budvicia aquatica	1	Budvicia aquatica DSM 5075
58605	1	2784	2754	Corynebacterium sputi	1	Corynebacterium sputi DSM 45148
58606	1	2817	2812	Flavobacterium antarcticum	1	Flavobacterium antarcticum DSM 19726
58607	1	5420	5388	Glycomyces tenuis	1	Glycomyces tenuis DSM 44171
58608	1	2044	2031	Ignatzschineria larvae	1	Ignatzschineria larvae DSM 13226
58609	1	4334	4318	Sedimenticola selenatireducens	1	Sedimenticola selenatireducens DSM 17993
58610	1	4271	4260	Thermocrispum municipale	1	Thermocrispum municipale DSM 44069
58611	1	3900	3896	Thermocrispum agreste	1	Thermocrispum agreste DSM 44070
58612	1	2891	2802	Psychrobacter sp.	1	Psychrobacter sp. PAMC 21119
58613	1	4545	4522	Janthinobacterium lividum	1	Janthinobacterium lividum PAMC 25724
58614	1	3952	3951	Sphingomonas echinoides	1	Sphingomonas echinoides ATCC 14820
58615	1	4515	4444	Sphingomonas sp.	1	Sphingomonas sp. PAMC 26621
58616	1	4314	4304	Sphingomonas sp.	1	Sphingomonas sp. PAMC 26605
58617	1	3100	3091	Salinibacterium sp.	1	Salinibacterium sp. PAMC 21357
58618	1	4209	4186	Sphingomonas sp.	1	Sphingomonas sp. PAMC 26617
58619	1	2837	2824	Methylophilus sp.	1	Methylophilus sp. 5
58620	1	3997	3917	Methylosarcina lacus	1	Methylosarcina lacus LW14
58621	1	3713	3698	Aeromonas australiensis	1	Aeromonas australiensis CECT 8023
58622	1	4618	4609	Citrobacter farmeri	1	Citrobacter farmeri GTC 1319
58623	1	6833	6823	Streptomyces tsukubaensis	1	Streptomyces tsukubaensis NRRL18488
58624	1	4877	4746	Sphingobium baderi	1	Sphingobium baderi LL03
58625	1	2734	2731	Lactobacillus rossiae	1	Lactobacillus rossiae DSM 15814
58626	1	4208	4199	Escherichia hermannii	1	Escherichia hermannii NBRC 105704
58627	1	4006	3997	Escherichia vulneris	1	Escherichia vulneris NBRC 102420
58628	1	4845	4792	Arthrobacter sp.	1	Arthrobacter sp. 31Y
58629	1	2664	2655	Actinomyces naeslundii	1	Actinomyces naeslundii str. Howell 279
58630	1	9941	9831	Streptomyces acidiscabies	1	Streptomyces acidiscabies 84-104
58631	1	5946	5900	Hoeflea sp.	1	Hoeflea sp. 108
58632	1	4103	4078	Methylococcaceae bacterium	1	Methylococcaceae bacterium KoM1
58633	1	4574	4540	Pseudoalteromonas citrea	1	Pseudoalteromonas citrea NCIMB 1889
58634	1	4401	4384	Pseudoalteromonas haloplanktis	1	Pseudoalteromonas haloplanktis ATCC 14393
58635	1	4998	4972	Pseudoalteromonas rubra	1	Pseudoalteromonas rubra ATCC 29570
58636	1	4243	4238	Pseudoalteromonas spongiae	1	Pseudoalteromonas spongiae UST010723-006
58637	1	3634	3629	Pseudoalteromonas undina	1	Pseudoalteromonas undina NCIMB 2128
58638	1	5445	5415	Bacillus bataviensis	1	Bacillus bataviensis LMG 21833
58639	1	3807	3780	Methyloversatilis sp.	1	Methyloversatilis sp. NVD
58640	1	3898	3862	Simiduia agarivorans	1	Simiduia agarivorans SA1 = DSM 21679
58641	1	5163	5090	Stanieria cyanosphaera	1	Stanieria cyanosphaera PCC 7437
58642	1	5200	4612	Leptolyngbya sp.	1	Leptolyngbya sp. PCC 7376
58643	1	5930	5898	Pseudomonas extremaustralis	1	Pseudomonas extremaustralis 14-3 substr. 14-3b
58644	1	5221	5200	Brevibacillus sp.	1	Brevibacillus sp. phR
58645	1	2086	2073	Anaerococcus sp.	1	Anaerococcus sp. PH9
58646	1	2006	1987	Peptoniphilus sp.	1	Peptoniphilus sp. ph5
58647	1	1610	1609	Actinomyces sp.	1	Actinomyces sp. ph3
58648	1	1644	1637	Clostridiales bacterium	1	Clostridiales bacterium ph2
58649	1	1947	1943	Coriobacteriaceae bacterium	1	Coriobacteriaceae bacterium phI
58650	1	2803	2796	Bacteroidales bacterium	1	Bacteroidales bacterium ph8
58651	1	1679	1663	Peptostreptococcaceae bacterium	1	Peptostreptococcaceae bacterium ph1
58652	1	3341	3325	Halomonas sp.	1	Halomonas sp. GFAJ-1
58653	1	3899	3891	Stenotrophomonas maltophilia	1	Stenotrophomonas maltophilia PML168
58654	1	3956	3918	Sphingopyxis sp.	1	Sphingopyxis sp. LC363
58655	1	4434	4403	Mycobacterium sp.	1	Mycobacterium sp. 141
58656	1	0	0	Acaricomes phytoseiuli	1	Acaricomes phytoseiuli DSM 14247
58657	1	0	0	Acetobacter nitrogenifigens	1	Acetobacter nitrogenifigens DSM 23921
58658	1	3905	3806	Acinetobacter tandoii	1	Acinetobacter tandoii DSM 14970 = CIP 107469
58659	1	3514	3468	Acinetobacter tjernbergiae	1	Acinetobacter tjernbergiae DSM 14971 = CIP 107465
58660	1	2756	2701	Acinetobacter towneri	1	Acinetobacter towneri DSM 14962 = CIP 107472
58661	1	2560	2528	Actinobacillus capsulatus	1	Actinobacillus capsulatus DSM 19761
58662	1	1790	1774	Actinobaculum urinale	1	Actinobaculum urinale DSM 15805
58663	1	7401	7344	Actinokineospora enzanensis	1	Actinokineospora enzanensis DSM 44649
58664	1	6539	6516	Actinokineospora inagensis	1	Actinokineospora inagensis DSM 44258
58665	1	6318	6308	Actinomadura atramentaria	1	Actinomadura atramentaria DSM 43919
58666	1	7632	7620	Actinomadura rifamycini	1	Actinomadura rifamycini DSM 43936
58667	1	2923	2868	Actinomyces dentalis	1	Actinomyces dentalis DSM 19115
58668	1	2912	2895	Actinomyces gerencseriae	1	Actinomyces gerencseriae DSM 6844
58669	1	3269	3230	Actinomyces israelii	1	Actinomyces israelii DSM 43320
58670	1	2055	2047	Actinomyces neuii	1	Actinomyces neuii subsp. neuii DSM 8576
58671	1	2044	2040	Actinomyces suimastitidis	1	Actinomyces suimastitidis DSM 15538
58672	1	2098	2093	Actinomyces vaccimaxillae	1	Actinomyces vaccimaxillae DSM 15804
58673	1	5699	5679	Actinomycetospora chiangmaiensis	1	Actinomycetospora chiangmaiensis DSM 45062
58674	1	10115	10090	Actinoplanes globisporus	1	Actinoplanes globisporus DSM 43857
58675	1	7550	7482	Actinopolymorpha alba	1	Actinopolymorpha alba DSM 45243
58676	1	3817	3805	Aequorivita capsosiphonis	1	Aequorivita capsosiphonis DSM 23843
58677	1	3481	3462	Aestuariibacter salexigens	1	Aestuariibacter salexigens DSM 15300
58678	1	2662	2658	Aestuariimicrobium kwangyangense	1	Aestuariimicrobium kwangyangense DSM 21549
58679	1	3751	3721	Afifella pfennigii	1	Afifella pfennigii DSM 17143
58680	1	3447	3440	Agromyces italicus	1	Agromyces italicus DSM 16388
58681	1	3986	3982	Agromyces subbeticus	1	Agromyces subbeticus DSM 16689
58682	1	4092	4049	Algicola sagamiensis	1	Algicola sagamiensis DSM 14643
58683	1	3949	3926	Algoriphagus mannitolivorans	1	Algoriphagus mannitolivorans DSM 15301
58684	1	4135	4125	Algoriphagus marincola	1	Algoriphagus marincola DSM 16067
58685	1	5344	5268	Algoriphagus terrigena	1	Algoriphagus terrigena DSM 22685
58686	1	4249	4238	Algoriphagus vanfongensis	1	Algoriphagus vanfongensis DSM 17529
58687	1	4333	4318	Aliagarivorans marinus	1	Aliagarivorans marinus DSM 23064
58688	1	4005	3985	Aliagarivorans taiwanensis	1	Aliagarivorans taiwanensis DSM 22990
58689	1	3405	3357	Alicyclobacillus contaminans	1	Alicyclobacillus contaminans DSM 17975
58690	1	3270	3236	Alicyclobacillus herbarius	1	Alicyclobacillus herbarius DSM 13609
58691	1	3580	3541	Alicyclobacillus pohliae	1	Alicyclobacillus pohliae DSM 22757
58692	1	3078	3070	Alkanindiges illinoisensis	1	Alkanindiges illinoisensis DSM 15370
58693	1	1408	1392	Allofustis seminis	1	Allofustis seminis DSM 15817
58694	1	3263	3161	Alysiella crassa	1	Alysiella crassa DSM 2578
58695	1	4004	3999	Amorphus coralli	1	Amorphus coralli DSM 19760
58696	1	8583	8523	Amycolatopsis taiwanensis	1	Amycolatopsis taiwanensis DSM 45107
58697	1	2383	2371	Anaerobiospirillum succiniciproducens	1	Anaerobiospirillum succiniciproducens DSM 6400
58698	1	2968	2956	Anaerovorax odorimutans	1	Anaerovorax odorimutans DSM 5092
58699	1	4443	4384	Andreprevotia chitinilytica	1	Andreprevotia chitinilytica DSM 18519
58700	1	4500	4436	Aneurinibacillus terranovensis	1	Aneurinibacillus terranovensis DSM 18919
58701	1	2498	2460	Aquaspirillum serpens	1	Aquaspirillum serpens DSM 68
58702	1	5528	5463	Aquimarina latercula	1	Aquimarina latercula DSM 2041
58703	1	4102	4070	Aquimarina muelleri	1	Aquimarina muelleri DSM 19832
58704	1	4262	4201	Arenibacter certesii	1	Arenibacter certesii DSM 19833
58705	1	3795	3746	Arenibacter latericius	1	Arenibacter latericius DSM 15913
58706	1	2662	2661	Arenimonas donghaensis	1	Arenimonas donghaensis DSM 18148 = HO3-R19
58707	1	3531	3514	Arhodomonas aquaeolei	1	Arhodomonas aquaeolei DSM 8974
58708	1	3742	3725	Arsenicicoccus bolidensis	1	Arsenicicoccus bolidensis DSM 15745
58709	1	3683	3571	Arsenophonus nasoniae	1	Arsenophonus nasoniae DSM 15247
58710	1	4475	4438	Arthrobacter castelli	1	Arthrobacter castelli DSM 16402
58711	1	2691	2679	Arthrobacter sanguinis	1	Arthrobacter sanguinis DSM 21259
58712	1	4474	4410	Asticcacaulis benevestitus	1	Asticcacaulis benevestitus DSM 16100 = ATCC BAA-896
58713	1	1476	1472	Atopobium fossor	1	Atopobium fossor DSM 15642
58714	1	2313	2255	Atopococcus tabaci	1	Atopococcus tabaci DSM 17538
58715	1	4390	4337	Aurantimonas coralicida	1	Aurantimonas coralicida DSM 14790
58716	1	4837	4778	Aureimonas ureilytica	1	Aureimonas ureilytica DSM 18598
58717	1	8073	7893	Azohydromonas australica	1	Azohydromonas australica DSM 1124
58718	1	3107	3102	Azonexus hydrophilus	1	Azonexus hydrophilus DSM 23864
58719	1	6042	5997	Azospirillum halopraeferens	1	Azospirillum halopraeferens DSM 3675
58720	1	4808	4793	Azospirillum irakense	1	Azospirillum irakense DSM 11586
58721	1	3583	3576	Azovibrio restrictus	1	Azovibrio restrictus DSM 23866
58722	1	4831	4788	Bacillus aidingensis	1	Bacillus aidingensis DSM 18341
58723	1	4103	4092	Bacillus aurantiacus	1	Bacillus aurantiacus DSM 18675
58724	1	3650	3613	Bacillus chagannorensis	1	Bacillus chagannorensis DSM 18086
58725	1	4743	4710	Bacillus fordii	1	Bacillus fordii DSM 16014
58726	1	4473	4436	Bacillus gelatini	1	Bacillus gelatini DSM 15865
58727	1	5532	5499	Bacillus kribbensis	1	Bacillus kribbensis DSM 17871
58728	1	5573	5429	Bacillus panaciterrae	1	Bacillus panaciterrae DSM 19096
58729	1	3364	3358	Balneatrix alpica	1	Balneatrix alpica DSM 16621
58730	1	2472	2469	Balneola vulgaris	1	Balneola vulgaris DSM 17893
58731	1	2097	2071	Bavariicoccus seileri	1	Bavariicoccus seileri DSM 19936
58732	1	6356	6186	Belnapia moabensis	1	Belnapia moabensis DSM 16746
58733	1	2386	2359	Brachymonas chironomi	1	Brachymonas chironomi DSM 19884
58734	1	1687	1685	Brackiella oedipodis	1	Brackiella oedipodis DSM 13743
58735	1	4956	4906	Brevibacillus laterosporus	1	Brevibacillus laterosporus DSM 25
58736	1	3612	3606	Brevibacterium album	1	Brevibacterium album DSM 18261
58737	1	2602	2599	Brevundimonas aveniformis	1	Brevundimonas aveniformis DSM 17977
58738	1	3170	3169	Brevundimonas bacteroides	1	Brevundimonas bacteroides DSM 4726
58739	1	2998	2989	Brevundimonas naejangsanensis	1	Brevundimonas naejangsanensis DSM 23858
58740	1	9043	8939	Burkholderia nodosa	1	Burkholderia nodosa DSM 21604
58741	1	3998	3973	Butyricimonas synergistica	1	Butyricimonas synergistica DSM 23225
58742	1	4008	3969	Butyricimonas virosa	1	Butyricimonas virosa DSM 23226
58743	1	1928	1910	Campylobacter cuniculorum	1	Campylobacter cuniculorum DSM 23162
58744	1	2032	2020	Campylobacter curvus	1	Campylobacter curvus DSM 6644
58745	1	4363	4301	Catellibacterium nectariphilum	1	Catellibacterium nectariphilum DSM 15620
58746	1	7521	7493	Catelliglobosispora koreensis	1	Catelliglobosispora koreensis DSM 44566
58747	1	3215	3211	Chitinibacter tainanensis	1	Chitinibacter tainanensis DSM 15459
58748	1	3536	3508	Chitinilyticum aquatile	1	Chitinilyticum aquatile DSM 21506
58749	1	4724	4715	Chitinimonas koreensis	1	Chitinimonas koreensis DSM 17726
58750	1	3723	3712	Chitiniphilus shinanonensis	1	Chitiniphilus shinanonensis DSM 23277
58751	1	3831	3816	Chryseobacterium caeni	1	Chryseobacterium caeni DSM 17710
58752	1	4089	4013	Chryseobacterium daeguense	1	Chryseobacterium daeguense DSM 19388
58753	1	4250	4221	Chryseobacterium gregarium	1	Chryseobacterium gregarium DSM 19109
[truncated: 3,954 more rows]

## Sheet: Table S5
Supplemental table S5. Cluster membership for 31,007 Bacterial genomes
species_id	genome_name	genome_id	genome_length	genome_status
61772	'Nostoc azollae' 0708	551116	5486145	Complete
61902	Abiotrophia defectiva ATCC 49176	592010	3479204	WGS
58656	Acaricomes phytoseiuli DSM 14247	1.12092e+06	2419519	WGS
61265	Acaryochloris marina MBIC11017	329726	8361599	Complete
61175	Acaryochloris sp. CCMEE 5410	310037	7836399	WGS
61669	Acetivibrio cellulolyticus CD2	509191	6103300	WGS
60614	Acetobacter aceti 1023	1.45739e+06	3014500	WGS
62063	Acetobacter aceti ATCC 23746	663932	3689820	WGS
60951	Acetobacter malorum	178901	3513430	WGS
58657	Acetobacter nitrogenifigens DSM 23921	1.12092e+06	4263332	WGS
59701	Acetobacter okinawensis JCM 25146	1.2365e+06	3166240	WGS
59675	Acetobacter papayae JCM 25143	1.23467e+06	3041080	WGS
59840	Acetobacter pasteurianus 386B	1.26684e+06	3078647	Complete
62598	Acetobacter pasteurianus 3P3	940282	3007385	WGS
61966	Acetobacter pasteurianus IFO 3283-01	634452	3340249	Complete
61972	Acetobacter pasteurianus IFO 3283-01-42C	634458	3247995	Complete
61967	Acetobacter pasteurianus IFO 3283-03	634453	3339669	Complete
61968	Acetobacter pasteurianus IFO 3283-07	634454	3338426	Complete
61973	Acetobacter pasteurianus IFO 3283-12	634459	3336990	Complete
61969	Acetobacter pasteurianus IFO 3283-22	634455	3339649	Complete
61970	Acetobacter pasteurianus IFO 3283-26	634456	3339683	Complete
61971	Acetobacter pasteurianus IFO 3283-32	634457	3337040	Complete
58325	Acetobacter pasteurianus NBRC 101655	1.00655e+06	2970030	WGS
62596	Acetobacter pasteurianus subsp. pasteurianus LMG 1262 = NBRC 106471	940265	2845480	WGS
62597	Acetobacter pasteurianus subsp. pasteurianus LMG 1262 = NBRC 106471	940265	2973500	WGS
59703	Acetobacter persici JCM 25330	1.2365e+06	3701950	WGS
62053	Acetobacter pomorum	65959.7	2843880	WGS
62615	Acetobacter pomorum DM001	945681	2871933	WGS
58411	Acetobacter tropicalis	104103	3746690	WGS
62242	Acetobacter tropicalis NBRC 101654	749388	3600961	WGS
58457	Acetobacteraceae bacterium AT-5844	1.05421e+06	5167692	WGS
58472	Acetobacterium dehalogenans DSM 11527	1.06898e+06	4041484	WGS
62550	Acetobacterium woodii DSM 1030	931626	4044777	Complete
61847	Acetohalobium arabaticum DSM 5501	574087	2469596	Complete
58333	Acetonema longum DSM 6540	1.00937e+06	4269885	WGS
59887	Acholeplasma axanthum ATCC 25176	1.27831e+06	1805214	WGS
60411	Acholeplasma equifetale ATCC 29724	1.40842e+06	1282370	WGS
59882	Acholeplasma granularum ATCC 19168	1.2783e+06	1452497	WGS
60412	Acholeplasma hippikon ATCC 29725	1.40842e+06	1430450	WGS
61519	Acholeplasma laidlawii PG-8A	441768	1496992	Complete
60413	Acholeplasma modicum ATCC 29102	1.40842e+06	1219180	WGS
61601	Achromobacter arsenitoxydans SY8	477184	6143266	WGS
62204	Achromobacter piechaudii ATCC 43553	742159	6147724	WGS
59272	Achromobacter piechaudii HLE	1.15692e+06	6820775	WGS
60824	Achromobacter sp. RTa	1.53256e+06	6476495	WGS
58128	Achromobacter undefined 4530	222.12	6322537	WGS
56249	Achromobacter undefined 5146	222.6	6361963	WGS
58128	Achromobacter undefined 6241_spades_final	222.11	6686778	WGS
58128	Achromobacter undefined 7022	222.13	6498950	WGS
55343	Achromobacter undefined 7393	222.8	6891463	WGS
58128	Achromobacter undefined 7863	222.9	6450125	WGS
58128	Achromobacter undefined 8173	222.15	6289667	WGS
62275	Achromobacter xylosoxidans A8	762376	7359146	Complete
55343	Achromobacter xylosoxidans AXX-A	1.0032e+06	6705209	WGS
56249	Achromobacter xylosoxidans C54	562972	6216570	WGS
56249	Achromobacter xylosoxidans NBRC 15126 = ATCC 27061	1.21698e+06	6683584	Complete
56249	Achromobacter xylosoxidans X02736	1.35047e+06	7013335	WGS
61896	Acidaminococcus fermentans DSM 20731	591001	2329769	Complete
54097	Acidaminococcus intestini DSM 21505	1.12092e+06	2275517	WGS
54097	Acidaminococcus intestini RyC-MR95	568816	2487765	Complete
54097	Acidaminococcus sp. BV3L6	1.11112e+06	2163314	WGS
54097	Acidaminococcus sp. D21	563191	2232933	WGS
54097	Acidaminococcus sp. HPA0509	1.20356e+06	2243882	WGS
61723	Acidimicrobium ferrooxidans DSM 10331	525909	2158157	Complete
60414	Acidiphilium angustum ATCC 35903	1.40842e+06	4175410	WGS
55617	Acidiphilium cryptum JF-5	349163	3963080	Complete
55617	Acidiphilium multivorum AIU301	926570	4214744	Complete
55617	Acidiphilium sp. JA12-A1	1.46455e+06	4188360	WGS
55617	Acidiphilium sp. PM	1.04321e+06	3826501	WGS
53518	Acidithiobacillus caldus ATCC 51756	637389	2927625	WGS
53518	Acidithiobacillus caldus SM-1	990289	3237599	Complete
57413	Acidithiobacillus ferrivorans	160808	3433670	WGS
57413	Acidithiobacillus ferrivorans SS3	743299	3145707	WGS
34835	Acidithiobacillus ferrooxidans ATCC 23270	243159	2982397	Complete
34835	Acidithiobacillus ferrooxidans ATCC 53993	380394	2885038	Complete
56869	Acidithiobacillus thiooxidans	930.4	3937900	WGS
56869	Acidithiobacillus thiooxidans A01	1.43206e+06	3807500	WGS
56869	Acidithiobacillus thiooxidans ATCC 19377	637390	3010347	WGS
61984	Acidobacteria bacterium KBS 146	639030	5001040	WGS
59850	Acidobacteriaceae bacterium KBS 83	1.26753e+06	6247660	WGS
59851	Acidobacteriaceae bacterium KBS 89	1.26753e+06	6008759	WGS
59852	Acidobacteriaceae bacterium KBS 96	1.26754e+06	6685036	WGS
61101	Acidobacteriaceae bacterium TAA166	278963	6136933	WGS
60265	Acidobacteriaceae bacterium URHE0068	1.38035e+06	6679190	WGS
61049	Acidobacterium capsulatum ATCC 51196	240015	4127356	Complete
62152	Acidobacterium sp. MP5ACTX9	696844	5503984	Complete
60303	Acidobacterium sp. PMMR2	1.38236e+06	3686520	WGS
57188	Acidocella facilis ATCC 35904	1.40842e+06	3403930	WGS
57188	Acidocella sp. MX-AZ02	1.21423e+06	3565185	WGS
59649	Acidomonas methanolica NBRC 104435	1.23135e+06	3690030	WGS
61314	Acidothermus cellulolyticus 11B	351608	2443540	Complete
58182	Acidovorax avenae subsp. avenae ATCC 19860	643561	5482170	Complete
58182	Acidovorax avenae subsp. avenae RS-1	995087	5514876	WGS
61443	Acidovorax citrulli AAC00-1	397946	5352772	Complete
57143	Acidovorax ebreus TPSY	535289	3796573	Complete
58182	Acidovorax oryzae ATCC 19882	1.40842e+06	5526780	WGS
33253	Acidovorax radicis N35	999386	5528386	WGS
33253	Acidovorax radicis N35v	999394	5527150	WGS
59219	Acidovorax sp. CF316	1.14432e+06	7063767	WGS
59875	Acidovorax sp. JHL-3	1.27676e+06	3987984	WGS
59876	Acidovorax sp. JHL-9	1.27676e+06	4190383	WGS
57143	Acidovorax sp. JS42	232722	4585154	Complete
61324	Acidovorax sp. KKS102	358220	5196935	Complete
59863	Acidovorax sp. MR-S7	1.26862e+06	4992809	WGS
61676	Acidovorax sp. NO-1	512030	4988925	WGS
57014	Acinetobacter baumanii BIDMC 56	1.43932e+06	3944480	WGS
57323	Acinetobacter baumanii BIDMC 57	1.43932e+06	4124690	WGS
57014	Acinetobacter baumannii	470.763	4036265	WGS
57668	Acinetobacter baumannii 1	470.571	3968209	WGS
57014	Acinetobacter baumannii 1007214	1.31078e+06	3948591	WGS
57014	Acinetobacter baumannii 1022959	1.31075e+06	4138302	WGS
57014	Acinetobacter baumannii 1031433	1.31059e+06	4008136	WGS
57014	Acinetobacter baumannii 1032241	1.31057e+06	4004423	WGS
57014	Acinetobacter baumannii 1032359	1.31057e+06	4690540	WGS
57014	Acinetobacter baumannii 1035119	1.31062e+06	3920542	WGS
57014	Acinetobacter baumannii 1036938	1.31055e+06	4109144	WGS
57014	Acinetobacter baumannii 1039621	1.31059e+06	3970580	WGS
57014	Acinetobacter baumannii 1040094	1.31059e+06	3967286	WGS
57014	Acinetobacter baumannii 1042969-1197	1.31083e+06	4252710	WGS
57014	Acinetobacter baumannii 1042969-1265	1.31057e+06	4053825	WGS
57014	Acinetobacter baumannii 1043794	1.31056e+06	3995611	WGS
57014	Acinetobacter baumannii 1043903	1.31057e+06	4115066	WGS
57014	Acinetobacter baumannii 1045092	1.31074e+06	4084940	WGS
57014	Acinetobacter baumannii 1046051	1.31057e+06	4093045	WGS
57014	Acinetobacter baumannii 1046674	1.31057e+06	3961725	WGS
57014	Acinetobacter baumannii 1051176	1.31058e+06	3849916	WGS
57014	Acinetobacter baumannii 1051830	1.31059e+06	3883229	WGS
57014	Acinetobacter baumannii 10519	1.31075e+06	3984292	WGS
57014	Acinetobacter baumannii 1058283	1.31077e+06	4123186	WGS
57014	Acinetobacter baumannii 1062314	1.31073e+06	4033719	WGS
57014	Acinetobacter baumannii 1064293_45	1.31075e+06	3907055	WGS
57014	Acinetobacter baumannii 1064293_46	1.31083e+06	4263450	WGS
57014	Acinetobacter baumannii 1075025	1.3106e+06	3906637	WGS
57014	Acinetobacter baumannii 107m	1.14914e+06	3874079	WGS
57014	Acinetobacter baumannii 1095464	1.31075e+06	3968237	WGS
57014	Acinetobacter baumannii 1096934	1.31066e+06	4295367	WGS
57014	Acinetobacter baumannii 1106579	1.31066e+06	3979256	WGS
57014	Acinetobacter baumannii 11126	1.3108e+06	4043259	WGS
57014	Acinetobacter baumannii 1117819	1.31078e+06	3927801	WGS
57323	Acinetobacter baumannii 1130196	1.31077e+06	4065658	WGS
57014	Acinetobacter baumannii 1146103	1.31066e+06	4398830	WGS
57014	Acinetobacter baumannii 1159076	1.31064e+06	4195598	WGS
57014	Acinetobacter baumannii 1170863	1.31078e+06	4077803	WGS
57014	Acinetobacter baumannii 1178044	1.31073e+06	4001665	WGS
57323	Acinetobacter baumannii 1179249	1.31079e+06	3930440	WGS
57014	Acinetobacter baumannii 118362	1.31062e+06	4368611	WGS
57014	Acinetobacter baumannii 1188188	1.31074e+06	4135657	WGS
57014	Acinetobacter baumannii 1195185_80	1.31083e+06	4263520	WGS
57014	Acinetobacter baumannii 1202252	1.31062e+06	4091921	WGS
57014	Acinetobacter baumannii 1207552	1.31073e+06	4091406	WGS
57014	Acinetobacter baumannii 121738	1.31082e+06	4038011	WGS
57014	Acinetobacter baumannii 1232509	1.31077e+06	4004002	WGS
57014	Acinetobacter baumannii 1237202	1.31077e+06	4178807	WGS
57014	Acinetobacter baumannii 1237893	1.31074e+06	4016470	WGS
56211	Acinetobacter baumannii 1239920	1.31068e+06	3281432	WGS
57660	Acinetobacter baumannii 1245249	1.31072e+06	3926981	WGS
57323	Acinetobacter baumannii 1245593	1.31073e+06	4083058	WGS
57014	Acinetobacter baumannii 1247182	1.3106e+06	3980629	WGS
57014	Acinetobacter baumannii 1262761-105	1.31083e+06	4139570	WGS
57014	Acinetobacter baumannii 1262761-97	1.31078e+06	3992597	WGS
57660	Acinetobacter baumannii 1264765	1.31082e+06	4261520	WGS
57014	Acinetobacter baumannii 1264936	1.31074e+06	3911443	WGS
57014	Acinetobacter baumannii 1266220	1.31076e+06	4137475	WGS
57014	Acinetobacter baumannii 1267820	1.31063e+06	3731258	WGS
57014	Acinetobacter baumannii 1271213	1.31074e+06	4040400	WGS
57014	Acinetobacter baumannii 1271651	1.31073e+06	3950458	WGS
57014	Acinetobacter baumannii 1276470-132	1.31083e+06	4115940	WGS
57014	Acinetobacter baumannii 1276470-86	1.31077e+06	4057477	WGS
57014	Acinetobacter baumannii 1277411	1.31066e+06	4183395	WGS
57323	Acinetobacter baumannii 1281984	1.3108e+06	4056736	WGS
57014	Acinetobacter baumannii 1284800	1.31063e+06	4484730	WGS
57014	Acinetobacter baumannii 1287985	1.31075e+06	3979957	WGS
60067	Acinetobacter baumannii 1288284	1.31071e+06	6046430	WGS
57014	Acinetobacter baumannii 1289546	1.3106e+06	4121481	WGS
57660	Acinetobacter baumannii 1289694	1.31061e+06	4172223	WGS
57014	Acinetobacter baumannii 1291820	1.31065e+06	4074547	WGS
57014	Acinetobacter baumannii 1293320	1.31075e+06	3997147	WGS
57014	Acinetobacter baumannii 1294217	1.31062e+06	4130122	WGS
57014	Acinetobacter baumannii 1294222	1.31077e+06	4143400	WGS
57660	Acinetobacter baumannii 1294243	1.31076e+06	4120684	WGS
56211	Acinetobacter baumannii 1294596	1.3106e+06	3326295	WGS
57660	Acinetobacter baumannii 1295259	1.31061e+06	4104931	WGS
57014	Acinetobacter baumannii 1295549	1.31077e+06	3904818	WGS
57014	Acinetobacter baumannii 1295743	1.31061e+06	4310759	WGS
57014	Acinetobacter baumannii 1296252	1.31075e+06	4052564	WGS
57014	Acinetobacter baumannii 1297	1.31058e+06	3840422	WGS
57014	Acinetobacter baumannii 1297549	1.31061e+06	3854004	WGS
57014	Acinetobacter baumannii 135867	1.31063e+06	4611550	WGS
57014	Acinetobacter baumannii 136706	1.31056e+06	4097486	WGS
57014	Acinetobacter baumannii 1391434	1.31076e+06	3681614	WGS
57014	Acinetobacter baumannii 1392509	1.31078e+06	4012055	WGS
57323	Acinetobacter baumannii 1396970	1.31062e+06	4135103	WGS
57014	Acinetobacter baumannii 1397084	1.31061e+06	3859823	WGS
57014	Acinetobacter baumannii 1397513	1.31077e+06	3983535	WGS
57014	Acinetobacter baumannii 1406182	1.3108e+06	4120654	WGS
57014	Acinetobacter baumannii 1406589	1.31076e+06	4125257	WGS
57014	Acinetobacter baumannii 1406750	1.31062e+06	4100120	WGS
57014	Acinetobacter baumannii 1412924	1.31071e+06	3809516	WGS
57014	Acinetobacter baumannii 1413735	1.31078e+06	4094197	WGS
57014	Acinetobacter baumannii 1417041	1.3107e+06	3694465	WGS
57014	Acinetobacter baumannii 1419130	1.31062e+06	4376621	WGS
57014	Acinetobacter baumannii 14216	1.3108e+06	4093385	WGS
57323	Acinetobacter baumannii 1424608	1.31078e+06	3896745	WGS
57014	Acinetobacter baumannii 1426993	1.31081e+06	4222538	WGS
57014	Acinetobacter baumannii 1428368	1.3108e+06	4048291	WGS
57014	Acinetobacter baumannii 1429530	1.31064e+06	3984073	WGS
57698	Acinetobacter baumannii 1437282	1.31064e+06	3948768	WGS
57014	Acinetobacter baumannii 1440422	1.31064e+06	3823811	WGS
57014	Acinetobacter baumannii 1440750	1.31066e+06	4137918	WGS
57014	Acinetobacter baumannii 144107	1.31069e+06	3917852	WGS
57660	Acinetobacter baumannii 1451147	1.31064e+06	4321150	WGS
57014	Acinetobacter baumannii 145660	1.31079e+06	4052224	WGS
57014	Acinetobacter baumannii 1457504	1.31072e+06	3955734	WGS
56211	Acinetobacter baumannii 1461402	1.31065e+06	3201021	WGS
57014	Acinetobacter baumannii 1461963	1.31065e+06	4081089	WGS
57014	Acinetobacter baumannii 1462234	1.31065e+06	4259162	WGS
57698	Acinetobacter baumannii 146457	1.31062e+06	4065571	WGS
57014	Acinetobacter baumannii 1465485	1.31065e+06	4219479	WGS
57014	Acinetobacter baumannii 1471012	1.31071e+06	3915181	WGS
57660	Acinetobacter baumannii 1475718	1.31065e+06	4187394	WGS
57014	Acinetobacter baumannii 1475764	1.31072e+06	3972105	WGS
57014	Acinetobacter baumannii 1482820	1.31072e+06	3997540	WGS
57014	Acinetobacter baumannii 1488685	1.31081e+06	4104562	WGS
57014	Acinetobacter baumannii 1494580	1.3108e+06	4190839	WGS
57014	Acinetobacter baumannii 1499986	1.31067e+06	4115160	WGS
57014	Acinetobacter baumannii 1505311	1.31081e+06	4142210	WGS
57014	Acinetobacter baumannii 1525283	1.31067e+06	3964280	WGS
57014	Acinetobacter baumannii 1526966	1.31068e+06	4019321	WGS
57014	Acinetobacter baumannii 1533268	1.31072e+06	3872925	WGS
57014	Acinetobacter baumannii 1539026	1.31081e+06	4145890	WGS
57660	Acinetobacter baumannii 1542444	1.31068e+06	3937356	WGS
57014	Acinetobacter baumannii 1546444	1.31067e+06	3784500	WGS
57014	Acinetobacter baumannii 1552389	1.31081e+06	4019359	WGS
57014	Acinetobacter baumannii 1552818	1.31067e+06	3993245	WGS
57014	Acinetobacter baumannii 1552865	1.31068e+06	3995455	WGS
57660	Acinetobacter baumannii 1564232	1.31072e+06	3904739	WGS
57323	Acinetobacter baumannii 1566109	1.31068e+06	4161432	WGS
57323	Acinetobacter baumannii 1571545	1.31082e+06	4460560	WGS
57014	Acinetobacter baumannii 1575710	1.3107e+06	4101494	WGS
57660	Acinetobacter baumannii 1578804	1.31069e+06	4085000	WGS
57014	Acinetobacter baumannii 15827	1.31063e+06	4635750	WGS
57014	Acinetobacter baumannii 1593273	1.3107e+06	4090099	WGS
57014	Acinetobacter baumannii 1598530	1.3107e+06	3882320	WGS
57014	Acinetobacter baumannii 1605	1.35182e+06	3912209	WGS
57014	Acinetobacter baumannii 16553_1	1.3111e+06	4099880	WGS
57014	Acinetobacter baumannii 16553_10	1.31111e+06	4246320	WGS
57014	Acinetobacter baumannii 16553_2	1.3111e+06	4214460	WGS
57014	Acinetobacter baumannii 16553_3	1.3111e+06	4079400	WGS
57014	Acinetobacter baumannii 16553_4	1.3111e+06	4193200	WGS
57014	Acinetobacter baumannii 16553_6	1.3111e+06	4222520	WGS
57014	Acinetobacter baumannii 16553_8	1.31111e+06	4181950	WGS
57014	Acinetobacter baumannii 16553_9	1.31111e+06	4216050	WGS
57014	Acinetobacter baumannii 1656-2	696749	4023106	Complete
57014	Acinetobacter baumannii 17534	1.31056e+06	4126451	WGS
57014	Acinetobacter baumannii 18689	1.31057e+06	4269670	WGS
57014	Acinetobacter baumannii 1999BJAB11	470.593	4140024	WGS
57014	Acinetobacter baumannii 2003BJAB12	470.576	3864810	WGS
57014	Acinetobacter baumannii 2004BJAB10	470.575	3910150	WGS
57014	Acinetobacter baumannii 2004BJAB13	470.577	3844023	WGS
57014	Acinetobacter baumannii 2004BJAB14	470.578	3814923	WGS
57014	Acinetobacter baumannii 2004ZJAB5	470.588	4048052	WGS
57014	Acinetobacter baumannii 2004ZJAB6	470.589	4045377	WGS
57014	Acinetobacter baumannii 2005JSAB1	470.58	4064212	WGS
57014	Acinetobacter baumannii 2005LNAB4	470.586	3859775	WGS
57014	Acinetobacter baumannii 2011BJAB1	470.558	4109350	WGS
57014	Acinetobacter baumannii 2011BJAB2	470.559	4028836	WGS
57014	Acinetobacter baumannii 2011BJAB3	470.572	4068854	WGS
57014	Acinetobacter baumannii 2011BJAB4	470.573	3942170	WGS
57014	Acinetobacter baumannii 2011BJAB5	470.59	4146723	WGS
57014	Acinetobacter baumannii 2011BJAB6	470.604	4000380	WGS
57014	Acinetobacter baumannii 2011BJAB7	470.574	4049091	WGS
57014	Acinetobacter baumannii 2011BJAB8	470.591	4059243	WGS
57014	Acinetobacter baumannii 2011BJAB9	470.592	3796058	WGS
57014	Acinetobacter baumannii 2011GDAB1	470.594	3977633	WGS
57014	Acinetobacter baumannii 2011GDAB2	470.595	3743772	WGS
57014	Acinetobacter baumannii 2011GDAB3	470.579	3876088	WGS
57014	Acinetobacter baumannii 2011GDAB4	470.596	3933660	WGS
57014	Acinetobacter baumannii 2011HNAB1	470.597	4104297	WGS
57014	Acinetobacter baumannii 2011LNAB1	470.585	3922990	WGS
57014	Acinetobacter baumannii 2011LNAB2	470.599	4040575	WGS
57014	Acinetobacter baumannii 2011LNAB3	470.6	3944558	WGS
57014	Acinetobacter baumannii 2011SDAB1	470.582	4054729	WGS
57014	Acinetobacter baumannii 2011SDAB2	470.583	4019788	WGS
57014	Acinetobacter baumannii 2011SDAB3	470.584	4045928	WGS
57014	Acinetobacter baumannii 2011SHAB1	470.581	3931310	WGS
57014	Acinetobacter baumannii 2011TJAB1	470.598	3801781	WGS
57014	Acinetobacter baumannii 2011ZJAB1	470.587	3963294	WGS
57014	Acinetobacter baumannii 2011ZJAB2	470.601	4003284	WGS
57014	Acinetobacter baumannii 2011ZJAB3	470.602	4056387	WGS
57014	Acinetobacter baumannii 2011ZJAB4	470.603	3818318	WGS
57014	Acinetobacter baumannii 21072	1.3107e+06	4176880	WGS
57014	Acinetobacter baumannii 213697	1.31076e+06	4083922	WGS
57014	Acinetobacter baumannii 214216	1.31078e+06	4041446	WGS
57323	Acinetobacter baumannii 216872	1.31073e+06	4162336	WGS
57323	Acinetobacter baumannii 21871	1.31063e+06	3897457	WGS
57660	Acinetobacter baumannii 225588	1.31079e+06	3946438	WGS
57014	Acinetobacter baumannii 23037	1.31058e+06	4134350	WGS
56211	Acinetobacter baumannii 230853	1.31065e+06	3221308	WGS
57014	Acinetobacter baumannii 232184	1.31069e+06	3859143	WGS
57014	Acinetobacter baumannii 233846	1.31074e+06	4505610	WGS
57014	Acinetobacter baumannii 23671	1.31073e+06	4069680	WGS
57014	Acinetobacter baumannii 24812_10	1.31085e+06	3938796	WGS
57014	Acinetobacter baumannii 24812_2	1.31085e+06	4014760	WGS
57014	Acinetobacter baumannii 24812_4	1.31085e+06	4096401	WGS
57014	Acinetobacter baumannii 24812_6	1.31085e+06	4058751	WGS
57014	Acinetobacter baumannii 24812_7	1.31085e+06	4134590	WGS
57014	Acinetobacter baumannii 24812_8	1.31085e+06	3962090	WGS
57014	Acinetobacter baumannii 24845_1	1.31086e+06	4087150	WGS
57014	Acinetobacter baumannii 24845_10	1.31086e+06	4065985	WGS
57014	Acinetobacter baumannii 24845_3	1.31086e+06	4065876	WGS
57014	Acinetobacter baumannii 24845_4	1.31086e+06	4070076	WGS
57014	Acinetobacter baumannii 24845_5	1.31086e+06	4090930	WGS
57014	Acinetobacter baumannii 24845_6	1.31086e+06	4050858	WGS
57014	Acinetobacter baumannii 24845_7	1.31086e+06	4087226	WGS
57014	Acinetobacter baumannii 24845_8	1.31086e+06	4075029	WGS
57014	Acinetobacter baumannii 24845_9	1.31086e+06	4203937	WGS
57014	Acinetobacter baumannii 24860_1	1.31084e+06	4099540	WGS
57014	Acinetobacter baumannii 24860_10	1.31084e+06	4190694	WGS
57014	Acinetobacter baumannii 24860_2	1.31084e+06	4103666	WGS
57014	Acinetobacter baumannii 24860_3	1.31084e+06	4123440	WGS
57014	Acinetobacter baumannii 24860_5	1.31084e+06	4128310	WGS
57014	Acinetobacter baumannii 24860_6	1.31084e+06	4045730	WGS
57014	Acinetobacter baumannii 24860_7	1.31084e+06	4016433	WGS
57014	Acinetobacter baumannii 24860_8	1.31084e+06	4049507	WGS
57014	Acinetobacter baumannii 24860_9	1.31084e+06	4126560	WGS
57014	Acinetobacter baumannii 24975_1	1.31095e+06	4006023	WGS
57014	Acinetobacter baumannii 24975_10	1.31095e+06	4031580	WGS
57014	Acinetobacter baumannii 24975_4	1.31095e+06	4014929	WGS
57014	Acinetobacter baumannii 24975_5	1.31095e+06	4250974	WGS
57014	Acinetobacter baumannii 24975_7	1.31095e+06	3977460	WGS
57014	Acinetobacter baumannii 24975_9	1.31095e+06	4015577	WGS
57014	Acinetobacter baumannii 25253_1	1.31088e+06	4001746	WGS
57014	Acinetobacter baumannii 25253_10	1.31088e+06	3990254	WGS
57014	Acinetobacter baumannii 25253_3	1.31088e+06	3975669	WGS
57014	Acinetobacter baumannii 25253_4	1.31088e+06	3990593	WGS
57014	Acinetobacter baumannii 25253_5	1.31088e+06	3989023	WGS
57014	Acinetobacter baumannii 25253_6	1.31088e+06	3998302	WGS
57014	Acinetobacter baumannii 25253_7	1.31088e+06	4011161	WGS
57014	Acinetobacter baumannii 25253_8	1.31088e+06	4007212	WGS
57014	Acinetobacter baumannii 25307_1	1.31087e+06	3984816	WGS
57014	Acinetobacter baumannii 25307_2	1.31087e+06	3954914	WGS
57014	Acinetobacter baumannii 25307_3	1.31087e+06	3959402	WGS
57014	Acinetobacter baumannii 25307_4	1.31087e+06	3997230	WGS
57014	Acinetobacter baumannii 25307_5	1.31087e+06	4008727	WGS
57014	Acinetobacter baumannii 25307_6	1.31087e+06	3997488	WGS
57014	Acinetobacter baumannii 25307_8	1.31087e+06	4017159	WGS
57014	Acinetobacter baumannii 25442_1	1.31112e+06	4119900	WGS
57014	Acinetobacter baumannii 25442_5	1.31112e+06	4078420	WGS
57014	Acinetobacter baumannii 25442_7	1.31112e+06	4162700	WGS
57014	Acinetobacter baumannii 25442_9	1.31113e+06	4106770	WGS
57014	Acinetobacter baumannii 25493_1	1.31102e+06	4031500	WGS
57014	Acinetobacter baumannii 25493_10	1.31102e+06	3926810	WGS
57014	Acinetobacter baumannii 25493_2	1.31102e+06	4010370	WGS
57014	Acinetobacter baumannii 25493_3	1.31102e+06	4073400	WGS
57014	Acinetobacter baumannii 25493_4	1.31102e+06	3977420	WGS
57014	Acinetobacter baumannii 25493_5	1.31102e+06	3926240	WGS
57014	Acinetobacter baumannii 25493_6	1.31102e+06	4107460	WGS
57014	Acinetobacter baumannii 25493_8	1.31102e+06	4106510	WGS
57014	Acinetobacter baumannii 25493_9	1.31102e+06	3949670	WGS
57014	Acinetobacter baumannii 25561_1	1.31096e+06	4130221	WGS
57014	Acinetobacter baumannii 25561_10	1.31096e+06	4130155	WGS
57014	Acinetobacter baumannii 25561_2	1.31096e+06	4087702	WGS
57014	Acinetobacter baumannii 25561_7	1.31096e+06	4100182	WGS
57014	Acinetobacter baumannii 25569_1	1.31111e+06	4100690	WGS
57014	Acinetobacter baumannii 25569_10	1.31112e+06	3999690	WGS
57014	Acinetobacter baumannii 25569_2	1.31111e+06	4005540	WGS
57014	Acinetobacter baumannii 25569_3	1.31111e+06	3993470	WGS
57014	Acinetobacter baumannii 25569_4	1.31111e+06	3970800	WGS
57014	Acinetobacter baumannii 25569_5	1.31111e+06	3989200	WGS
57014	Acinetobacter baumannii 25569_6	1.31111e+06	4132460	WGS
57014	Acinetobacter baumannii 25569_7	1.31111e+06	4058300	WGS
57014	Acinetobacter baumannii 25569_8	1.31112e+06	3933650	WGS
57014	Acinetobacter baumannii 25569_9	1.31112e+06	3966070	WGS
57014	Acinetobacter baumannii 25681_2	1.31101e+06	4113633	WGS
57014	Acinetobacter baumannii 25681_3	1.31101e+06	4072986	WGS
57014	Acinetobacter baumannii 25681_5	1.31101e+06	4086661	WGS
57014	Acinetobacter baumannii 25681_6	1.31101e+06	4113024	WGS
57014	Acinetobacter baumannii 25681_8	1.31101e+06	4097279	WGS
57014	Acinetobacter baumannii 25681_9	1.31101e+06	4141024	WGS
57014	Acinetobacter baumannii 25691_1	1.31093e+06	4094287	WGS
57014	Acinetobacter baumannii 25691_10	1.31093e+06	4072405	WGS
57014	Acinetobacter baumannii 25691_2	1.31093e+06	3989257	WGS
57014	Acinetobacter baumannii 25691_5	1.31093e+06	4045580	WGS
57014	Acinetobacter baumannii 25691_6	1.31093e+06	4085006	WGS
57014	Acinetobacter baumannii 25691_7	1.31093e+06	4397320	WGS
57014	Acinetobacter baumannii 25691_8	1.31093e+06	4352750	WGS
57014	Acinetobacter baumannii 25691_9	1.31093e+06	4084467	WGS
57014	Acinetobacter baumannii 25750_1	1.31097e+06	4069120	WGS
57014	Acinetobacter baumannii 25750_6	1.31097e+06	4040234	WGS
57014	Acinetobacter baumannii 25750_7	1.31097e+06	4089941	WGS
57014	Acinetobacter baumannii 25750_8	1.31097e+06	4003506	WGS
57014	Acinetobacter baumannii 25766_1	1.31092e+06	4089688	WGS
57014	Acinetobacter baumannii 25766_10	1.31092e+06	4118897	WGS
57014	Acinetobacter baumannii 25766_2	1.31092e+06	4055615	WGS
57014	Acinetobacter baumannii 25766_3	1.31092e+06	4173502	WGS
57014	Acinetobacter baumannii 25766_4	1.31092e+06	4072802	WGS
57014	Acinetobacter baumannii 25766_5	1.31092e+06	4123300	WGS
57014	Acinetobacter baumannii 25766_6	1.31092e+06	4175507	WGS
57014	Acinetobacter baumannii 25766_7	1.31092e+06	4050093	WGS
57014	Acinetobacter baumannii 25766_9	1.31092e+06	3997388	WGS
57014	Acinetobacter baumannii 25878_1	1.31105e+06	4126280	WGS
57014	Acinetobacter baumannii 25878_2	1.31105e+06	4197190	WGS
57014	Acinetobacter baumannii 25878_3	1.31105e+06	4237590	WGS
57323	Acinetobacter baumannii 259052	1.3107e+06	4125242	WGS
57014	Acinetobacter baumannii 25935_1	1.31094e+06	4085585	WGS
57014	Acinetobacter baumannii 25935_10	1.31094e+06	4015435	WGS
57014	Acinetobacter baumannii 25935_2	1.31094e+06	4155971	WGS
57014	Acinetobacter baumannii 25935_4	1.31094e+06	4014483	WGS
57014	Acinetobacter baumannii 25935_5	1.31094e+06	3976907	WGS
57014	Acinetobacter baumannii 25935_6	1.31094e+06	4062975	WGS
57014	Acinetobacter baumannii 25935_7	1.31094e+06	4082354	WGS
57014	Acinetobacter baumannii 25935_8	1.31094e+06	4048204	WGS
57014	Acinetobacter baumannii 25935_9	1.31094e+06	4009654	WGS
57323	Acinetobacter baumannii 25977_1	1.31091e+06	4035349	WGS
57323	Acinetobacter baumannii 25977_10	1.31091e+06	4112598	WGS
57323	Acinetobacter baumannii 25977_2	1.31091e+06	4043777	WGS
57323	Acinetobacter baumannii 25977_3	1.31091e+06	4069236	WGS
57323	Acinetobacter baumannii 25977_4	1.31091e+06	4050358	WGS
57323	Acinetobacter baumannii 25977_6	1.31091e+06	4053718	WGS
57323	Acinetobacter baumannii 25977_7	1.31091e+06	4002456	WGS
57323	Acinetobacter baumannii 25977_8	1.31091e+06	4032736	WGS
57323	Acinetobacter baumannii 25977_9	1.31091e+06	4277910	WGS
57014	Acinetobacter baumannii 26016_1	1.31107e+06	4156990	WGS
57014	Acinetobacter baumannii 26016_10	1.31108e+06	4169540	WGS
57014	Acinetobacter baumannii 26016_2	1.31107e+06	4326840	WGS
57014	Acinetobacter baumannii 26016_3	1.31107e+06	4373640	WGS
57014	Acinetobacter baumannii 26016_4	1.31107e+06	4175480	WGS
57014	Acinetobacter baumannii 26016_5	1.31107e+06	4171440	WGS
57014	Acinetobacter baumannii 26016_6	1.31107e+06	4145860	WGS
57014	Acinetobacter baumannii 26016_7	1.31107e+06	4371370	WGS
57014	Acinetobacter baumannii 26016_8	1.31108e+06	4171950	WGS
57014	Acinetobacter baumannii 26016_9	1.31108e+06	4159860	WGS
56211	Acinetobacter baumannii 263903-1	1.31068e+06	3259260	WGS
57660	Acinetobacter baumannii 263903-2	1.31083e+06	4117658	WGS
57014	Acinetobacter baumannii 268680	1.3107e+06	3854142	WGS
57660	Acinetobacter baumannii 269	470.554	4428340	WGS
56211	Acinetobacter baumannii 272263	1.31064e+06	3339773	WGS
57014	Acinetobacter baumannii 273929	1.31074e+06	3939308	WGS
57014	Acinetobacter baumannii 277047	1.31078e+06	3895073	WGS
57014	Acinetobacter baumannii 2887	1.31075e+06	4109182	WGS
57014	Acinetobacter baumannii 29280	1.3106e+06	3892733	WGS
57014	Acinetobacter baumannii 299505	1.31064e+06	3956301	WGS
57014	Acinetobacter baumannii 303002	1.31079e+06	3866656	WGS
57014	Acinetobacter baumannii 318814	1.31071e+06	4114722	WGS
57014	Acinetobacter baumannii 323408	1.31082e+06	4128828	WGS
57014	Acinetobacter baumannii 3390	1.31071e+06	3981832	WGS
57014	Acinetobacter baumannii 339786	1.3108e+06	4001369	WGS
57014	Acinetobacter baumannii 34001	1.31058e+06	3856929	WGS
57014	Acinetobacter baumannii 341	470.555	3880097	WGS
57014	Acinetobacter baumannii 342950	1.31064e+06	4048445	WGS
57014	Acinetobacter baumannii 34654	1.31058e+06	4091858	WGS
58016	Acinetobacter baumannii 348935	1.31061e+06	3353363	WGS
57014	Acinetobacter baumannii 3909	886889	3939955	WGS
57014	Acinetobacter baumannii 397971	1.31069e+06	3941918	WGS
57014	Acinetobacter baumannii 3990	886888	3998045	WGS
57014	Acinetobacter baumannii 400834	1.31062e+06	4046645	WGS
57014	Acinetobacter baumannii 4190	886890	4003876	WGS
57014	Acinetobacter baumannii 42057_2	1.31113e+06	3930870	WGS
57014	Acinetobacter baumannii 42057_3	1.31114e+06	4299300	WGS
57014	Acinetobacter baumannii 42057_4	1.31114e+06	3979220	WGS
57014	Acinetobacter baumannii 42057_5	1.31114e+06	4249600	WGS
57014	Acinetobacter baumannii 42057_6	1.31114e+06	4080450	WGS
57014	Acinetobacter baumannii 426863	1.31078e+06	3890522	WGS
57014	Acinetobacter baumannii 42887	1.31069e+06	3944835	WGS
57014	Acinetobacter baumannii 43557_1	1.31105e+06	4198050	WGS
57014	Acinetobacter baumannii 43926	1.31068e+06	3982180	WGS
57014	Acinetobacter baumannii 44298_1	1.31108e+06	4019930	WGS
57014	Acinetobacter baumannii 44298_10	1.31109e+06	3967530	WGS
57014	Acinetobacter baumannii 44298_2	1.31108e+06	4025500	WGS
57014	Acinetobacter baumannii 44298_3	1.31108e+06	4023030	WGS
57014	Acinetobacter baumannii 44298_4	1.31108e+06	4007940	WGS
57014	Acinetobacter baumannii 44298_5	1.31108e+06	4043460	WGS
57014	Acinetobacter baumannii 44298_6	1.31108e+06	4096980	WGS
57014	Acinetobacter baumannii 44298_7	1.31108e+06	4000040	WGS
57014	Acinetobacter baumannii 44298_8	1.31109e+06	3964800	WGS
57014	Acinetobacter baumannii 44298_9	1.31109e+06	4024610	WGS
57014	Acinetobacter baumannii 44327_1	1.31099e+06	3991614	WGS
57014	Acinetobacter baumannii 44327_2	1.31099e+06	4070952	WGS
57014	Acinetobacter baumannii 44327_4	1.31099e+06	4080218	WGS
57014	Acinetobacter baumannii 44327_5	1.31099e+06	4045680	WGS
57014	Acinetobacter baumannii 44327_6	1.31099e+06	4137162	WGS
57014	Acinetobacter baumannii 44327_7	1.31099e+06	3985849	WGS
57014	Acinetobacter baumannii 44327_8	1.31099e+06	4057265	WGS
57014	Acinetobacter baumannii 44362_1	1.31104e+06	4020860	WGS
57014	Acinetobacter baumannii 44362_10	1.31104e+06	4119250	WGS
57014	Acinetobacter baumannii 44362_2	1.31104e+06	4057970	WGS
57014	Acinetobacter baumannii 44362_3	1.31104e+06	4000210	WGS
57014	Acinetobacter baumannii 44362_4	1.31104e+06	4088820	WGS
57014	Acinetobacter baumannii 44362_5	1.31104e+06	4094320	WGS
57014	Acinetobacter baumannii 44362_6	1.31104e+06	4060950	WGS
57014	Acinetobacter baumannii 44362_7	1.31104e+06	4118810	WGS
57014	Acinetobacter baumannii 44362_8	1.31104e+06	4221670	WGS
57014	Acinetobacter baumannii 44362_9	1.31104e+06	4068000	WGS
57014	Acinetobacter baumannii 44437_3	1.31103e+06	4047080	WGS
57014	Acinetobacter baumannii 44437_4	1.31103e+06	4039280	WGS
57014	Acinetobacter baumannii 44437_5	1.31103e+06	4040840	WGS
57014	Acinetobacter baumannii 44437_7	1.31103e+06	4084630	WGS
57014	Acinetobacter baumannii 44437_8	1.31103e+06	4099830	WGS
57014	Acinetobacter baumannii 44437_9	1.31103e+06	4033660	WGS
57014	Acinetobacter baumannii 44467_1	1.31098e+06	4070008	WGS
57014	Acinetobacter baumannii 44467_10	1.31098e+06	4019197	WGS
57014	Acinetobacter baumannii 44467_2	1.31098e+06	4052338	WGS
57014	Acinetobacter baumannii 44467_3	1.31098e+06	4095847	WGS
57014	Acinetobacter baumannii 44467_4	1.31098e+06	4086190	WGS
57014	Acinetobacter baumannii 44467_5	1.31098e+06	4067167	WGS
57014	Acinetobacter baumannii 44467_6	1.31098e+06	4052305	WGS
57014	Acinetobacter baumannii 44467_7	1.31098e+06	4045402	WGS
57014	Acinetobacter baumannii 44467_8	1.31098e+06	4019898	WGS
57014	Acinetobacter baumannii 44467_9	1.31098e+06	4060811	WGS
57014	Acinetobacter baumannii 44839_10	1.31107e+06	4074500	WGS
57014	Acinetobacter baumannii 44839_8	1.31107e+06	4073780	WGS
57014	Acinetobacter baumannii 44839_9	1.31107e+06	4048630	WGS
57014	Acinetobacter baumannii 44857_10	1.311e+06	4034660	WGS
57014	Acinetobacter baumannii 44857_9	1.311e+06	3992280	WGS
57014	Acinetobacter baumannii 44895_1	1.31089e+06	4004127	WGS
57014	Acinetobacter baumannii 44895_10	1.31089e+06	4016130	WGS
57014	Acinetobacter baumannii 44895_2	1.31089e+06	4039978	WGS
57014	Acinetobacter baumannii 44895_3	1.31089e+06	4038935	WGS
57014	Acinetobacter baumannii 44895_4	1.31089e+06	3980698	WGS
57014	Acinetobacter baumannii 44895_5	1.31089e+06	4043115	WGS
57014	Acinetobacter baumannii 44895_6	1.31089e+06	4045692	WGS
57014	Acinetobacter baumannii 44895_8	1.31089e+06	4049881	WGS
57014	Acinetobacter baumannii 44895_9	1.31089e+06	4039421	WGS
57014	Acinetobacter baumannii 45002_10	1.3109e+06	4048303	WGS
57014	Acinetobacter baumannii 45002_3	1.3109e+06	3989520	WGS
57014	Acinetobacter baumannii 45002_4	1.3109e+06	3997997	WGS
57014	Acinetobacter baumannii 45002_5	1.3109e+06	3981911	WGS
57014	Acinetobacter baumannii 45002_6	1.3109e+06	3998527	WGS
57014	Acinetobacter baumannii 45002_7	1.3109e+06	3978082	WGS
57014	Acinetobacter baumannii 45002_8	1.3109e+06	4315345	WGS
57014	Acinetobacter baumannii 45002_9	1.3109e+06	4369310	WGS
57014	Acinetobacter baumannii 45052_1	1.31114e+06	3961850	WGS
57014	Acinetobacter baumannii 45052_2	1.31114e+06	4070020	WGS
57014	Acinetobacter baumannii 45052_3	1.31114e+06	4000950	WGS
57014	Acinetobacter baumannii 45052_4	1.31114e+06	3983870	WGS
57014	Acinetobacter baumannii 45052_5	1.31115e+06	3960080	WGS
57014	Acinetobacter baumannii 45057_1	1.31113e+06	4318790	WGS
57014	Acinetobacter baumannii 45057_4	1.31113e+06	4010350	WGS
57014	Acinetobacter baumannii 45075_1	1.31109e+06	3943920	WGS
57014	Acinetobacter baumannii 45075_10	1.3111e+06	3940410	WGS
57014	Acinetobacter baumannii 45075_2	1.31109e+06	3968410	WGS
57014	Acinetobacter baumannii 45075_3	1.31109e+06	3953020	WGS
57014	Acinetobacter baumannii 45075_4	1.31109e+06	4158270	WGS
57014	Acinetobacter baumannii 45075_5	1.31109e+06	3919260	WGS
57014	Acinetobacter baumannii 45075_6	1.31109e+06	3942500	WGS
57014	Acinetobacter baumannii 45075_8	1.3111e+06	3930800	WGS
57014	Acinetobacter baumannii 45075_9	1.3111e+06	3960470	WGS
57014	Acinetobacter baumannii 457946	1.31074e+06	4184167	WGS
57014	Acinetobacter baumannii 458282	1.31081e+06	4032656	WGS
57014	Acinetobacter baumannii 466215	1.31079e+06	4011224	WGS
57014	Acinetobacter baumannii 466760	1.31061e+06	3877012	WGS
57014	Acinetobacter baumannii 470922	1.31081e+06	4200174	WGS
57014	Acinetobacter baumannii 472237-1196	1.31056e+06	4086816	WGS
57014	Acinetobacter baumannii 472237-120	1.31083e+06	4043063	WGS
57014	Acinetobacter baumannii 4749	1.31063e+06	4113213	WGS
57660	Acinetobacter baumannii 478810	1.31072e+06	4079775	WGS
57496	Acinetobacter baumannii 479375	1.3106e+06	3448342	WGS
57014	Acinetobacter baumannii 480175	1.31075e+06	4052366	WGS
57014	Acinetobacter baumannii 48055	1.29357e+06	4032809	WGS
57014	Acinetobacter baumannii 496487	1.31063e+06	4305750	WGS
57014	Acinetobacter baumannii 50595	1.31066e+06	4009164	WGS
57014	Acinetobacter baumannii 532279	1.31069e+06	4041073	WGS
57014	Acinetobacter baumannii 532413	1.31058e+06	4116832	WGS
57014	Acinetobacter baumannii 53264	1.2163e+06	3959308	WGS
57014	Acinetobacter baumannii 541915	1.31079e+06	3791067	WGS
57014	Acinetobacter baumannii 554515	1.31067e+06	4019130	WGS
57014	Acinetobacter baumannii 562700	1.31059e+06	3961529	WGS
57014	Acinetobacter baumannii 564012	1.31056e+06	4114730	WGS
60068	Acinetobacter baumannii 573719	1.31076e+06	4249994	WGS
57014	Acinetobacter baumannii 58452	1.31058e+06	4086754	WGS
57014	Acinetobacter baumannii 6013113	592014	3989235	WGS
57014	Acinetobacter baumannii 6013150	525243	3986477	WGS
57014	Acinetobacter baumannii 6014059	525242	3833785	WGS
57014	Acinetobacter baumannii 607805	1.31072e+06	4069960	WGS
57323	Acinetobacter baumannii 6112	1.31067e+06	4333720	WGS
57014	Acinetobacter baumannii 6200	470.773	4073976	Complete
57014	Acinetobacter baumannii 625974	1.31061e+06	4052054	WGS
57014	Acinetobacter baumannii 628418	1.31076e+06	4143004	WGS
57323	Acinetobacter baumannii 6411	470.772	3957079	Complete
57014	Acinetobacter baumannii 647609	1.31061e+06	4008513	WGS
57014	Acinetobacter baumannii 653020	1.31059e+06	3894234	WGS
57014	Acinetobacter baumannii 655555	1.31071e+06	4013441	WGS
57014	Acinetobacter baumannii 662545-1347	1.31058e+06	3933477	WGS
57014	Acinetobacter baumannii 6870155	470.57	3981400	WGS
57014	Acinetobacter baumannii 6935	1.31058e+06	4854940	WGS
57323	Acinetobacter baumannii 694762	1.31071e+06	4068799	WGS
57014	Acinetobacter baumannii 70136	1.31079e+06	4052569	WGS
57014	Acinetobacter baumannii 722310	1.31081e+06	4039475	WGS
57660	Acinetobacter baumannii 723929	1.31071e+06	4068780	WGS
57660	Acinetobacter baumannii 72431	1.31069e+06	4404440	WGS
57014	Acinetobacter baumannii 724909	1.31065e+06	4048855	WGS
57014	Acinetobacter baumannii 730795	1.3108e+06	4034277	WGS
57014	Acinetobacter baumannii 73736	1.31074e+06	3891817	WGS
57014	Acinetobacter baumannii 737393	1.31074e+06	4116293	WGS
57660	Acinetobacter baumannii 742879	1.31079e+06	4028202	WGS
57014	Acinetobacter baumannii 754286	1.31067e+06	4281240	WGS
57014	Acinetobacter baumannii 755829	1.31076e+06	4165934	WGS
57014	Acinetobacter baumannii 756476	1.31082e+06	4111660	WGS
57323	Acinetobacter baumannii 766875	1.31068e+06	4006235	WGS
57014	Acinetobacter baumannii 781407	1.3106e+06	4062359	WGS
57014	Acinetobacter baumannii 7893	1.31081e+06	4265621	WGS
57323	Acinetobacter baumannii 796380-1375	1.31083e+06	4146080	WGS
57014	Acinetobacter baumannii 796380-2102	1.31059e+06	4188949	WGS
57660	Acinetobacter baumannii 809848	1.31064e+06	4098322	WGS
57014	Acinetobacter baumannii 825610	1.31072e+06	4055340	WGS
57660	Acinetobacter baumannii 826659	1.31076e+06	3901056	WGS
57014	Acinetobacter baumannii 831240	1.3107e+06	3958228	WGS
57014	Acinetobacter baumannii 83444	1.31068e+06	3992019	WGS
57014	Acinetobacter baumannii 836190	1.31073e+06	4019769	WGS
57014	Acinetobacter baumannii 846928	1.31075e+06	3895563	WGS
57014	Acinetobacter baumannii 855125	1.31066e+06	4401280	WGS
56211	Acinetobacter baumannii 869535	1.31062e+06	3200684	WGS
57660	Acinetobacter baumannii 883425	1.31077e+06	4031752	WGS
57323	Acinetobacter baumannii 88816	1.31076e+06	4094120	WGS
57660	Acinetobacter baumannii 907131	1.31067e+06	3876933	WGS
57014	Acinetobacter baumannii 916567	1.31057e+06	4354410	WGS
57014	Acinetobacter baumannii 923118	1.31071e+06	4174039	WGS
57014	Acinetobacter baumannii 929679-2095	1.31059e+06	4132521	WGS
57014	Acinetobacter baumannii 929679-598	1.31083e+06	4698350	WGS
57014	Acinetobacter baumannii 940793	1.31063e+06	4340960	WGS
57014	Acinetobacter baumannii 942133	1.31056e+06	4144485	WGS
57014	Acinetobacter baumannii 942194	1.31059e+06	3992872	WGS
57014	Acinetobacter baumannii 947299	1.31059e+06	4023842	WGS
57014	Acinetobacter baumannii 951631	1.31065e+06	4279211	WGS
57014	Acinetobacter baumannii 959073	1.31056e+06	3973970	WGS
57014	Acinetobacter baumannii 96512	1.3106e+06	4288070	WGS
57014	Acinetobacter baumannii 972082	1.31056e+06	3938654	WGS
57014	Acinetobacter baumannii 981176	1.31079e+06	4116631	WGS
56211	Acinetobacter baumannii 983759	1.31066e+06	3285828	WGS
57014	Acinetobacter baumannii 984213	1.3106e+06	4137935	WGS
57014	Acinetobacter baumannii 987421	1.31056e+06	4179950	WGS
57014	Acinetobacter baumannii 98826	1.31079e+06	4062117	WGS
57014	Acinetobacter baumannii 99063	1.31063e+06	4343166	WGS
57014	Acinetobacter baumannii 993520	1.31056e+06	4148254	WGS
57014	Acinetobacter baumannii A1	470.775	3917739	Complete
57014	Acinetobacter baumannii A144	470.556	4311358	WGS
57014	Acinetobacter baumannii A33405	470.553	3890158	WGS
57014	Acinetobacter baumannii AA-014	903937	3848356	WGS
57014	Acinetobacter baumannii AB-HKU3-08	1.34679e+06	4026348	WGS
57014	Acinetobacter baumannii AB-HKU3-10	1.34679e+06	3907172	WGS
57014	Acinetobacter baumannii AB0057	480120	4059242	Complete
57014	Acinetobacter baumannii AB056	710094	3689177	WGS
57014	Acinetobacter baumannii AB07	1.41322e+06	4242611	Complete
57014	Acinetobacter baumannii AB1H8	1.22203e+06	3979654	WGS
57014	Acinetobacter baumannii AB210	886886	4040230	WGS
57014	Acinetobacter baumannii AB307-0294	557600	3760981	Complete
57014	Acinetobacter baumannii AB405E4	1.22203e+06	3641867	WGS
57014	Acinetobacter baumannii AB4857	1.11623e+06	4019014	WGS
57014	Acinetobacter baumannii AB4A3	1.22203e+06	4094028	WGS
57014	Acinetobacter baumannii AB5075	1.11623e+06	4050163	WGS
57014	Acinetobacter baumannii AB5256	1.11624e+06	4158015	WGS
57014	Acinetobacter baumannii AB5711	1.11624e+06	3999696	WGS
57014	Acinetobacter baumannii AB900	557601	3901721	WGS
57014	Acinetobacter baumannii ABIsac_ColiR	1.20035e+06	3780331	WGS
57014	Acinetobacter baumannii ABIsac_ColiS	1.20035e+06	3769315	WGS
57014	Acinetobacter baumannii ABNIH1	992402	3886760	WGS
57014	Acinetobacter baumannii ABNIH10	1.09447e+06	3771548	WGS
57014	Acinetobacter baumannii ABNIH11	1.09448e+06	3947899	WGS
57014	Acinetobacter baumannii ABNIH13	1.09448e+06	3932133	WGS
57014	Acinetobacter baumannii ABNIH14	1.09448e+06	3929724	WGS
57014	Acinetobacter baumannii ABNIH15	1.09448e+06	3877109	WGS
57014	Acinetobacter baumannii ABNIH16	1.09448e+06	4026882	WGS
57014	Acinetobacter baumannii ABNIH17	1.09448e+06	3974390	WGS
57014	Acinetobacter baumannii ABNIH18	1.09448e+06	3946709	WGS
57014	Acinetobacter baumannii ABNIH19	1.09448e+06	3963028	WGS
57014	Acinetobacter baumannii ABNIH2	992403	3918885	WGS
57014	Acinetobacter baumannii ABNIH20	1.09448e+06	3861966	WGS
57014	Acinetobacter baumannii ABNIH22	1.09449e+06	3918911	WGS
57014	Acinetobacter baumannii ABNIH23	1.09449e+06	3903695	WGS
57014	Acinetobacter baumannii ABNIH24	1.09449e+06	3800346	WGS
57014	Acinetobacter baumannii ABNIH25	1.22417e+06	3891013	WGS
57014	Acinetobacter baumannii ABNIH26	1.22417e+06	3921761	WGS
57014	Acinetobacter baumannii ABNIH3	992404	4020293	WGS
57014	Acinetobacter baumannii ABNIH4	992405	3966588	WGS
57014	Acinetobacter baumannii ABNIH5	1.09447e+06	3922509	WGS
57014	Acinetobacter baumannii ABNIH6	1.09447e+06	3971102	WGS
57014	Acinetobacter baumannii ABNIH7	1.09447e+06	3903503	WGS
57014	Acinetobacter baumannii ABUH16665	470.623	4090105	WGS
57014	Acinetobacter baumannii ABUH222345	470.616	4264774	WGS
57014	Acinetobacter baumannii ABUH222351	470.619	4146945	WGS
57014	Acinetobacter baumannii ABUH304350	470.618	4043022	WGS
57014	Acinetobacter baumannii ABUH304352	470.62	4032501	WGS
57014	Acinetobacter baumannii ABUH319118	470.609	4141688	WGS
57014	Acinetobacter baumannii ABUH404571	470.622	3982792	WGS
57014	Acinetobacter baumannii ABUH42783	470.607	4273356	WGS
57014	Acinetobacter baumannii ABUH433132	470.61	4189571	WGS
57014	Acinetobacter baumannii ABUH463346	470.617	4173385	WGS
57014	Acinetobacter baumannii ABUH4837	470.606	3790937	WGS
57014	Acinetobacter baumannii ABUH497144	470.611	3888080	WGS
57014	Acinetobacter baumannii ABUH504227	470.612	4156718	WGS
57014	Acinetobacter baumannii ABUH504238	470.613	4155624	WGS
57014	Acinetobacter baumannii ABUH518307	470.615	4189233	WGS
57014	Acinetobacter baumannii ABUH524354	470.621	4027625	WGS
57014	Acinetobacter baumannii ABUH60486	470.608	3868384	WGS
57014	Acinetobacter baumannii ABUH80286	470.614	4192270	WGS
57014	Acinetobacter baumannii AB_1536-8	1.22124e+06	3822131	WGS
57014	Acinetobacter baumannii AB_1582-8	1.22125e+06	4026380	WGS
57014	Acinetobacter baumannii AB_1583-8	1.22125e+06	3833649	WGS
57014	Acinetobacter baumannii AB_1594-8	1.22125e+06	3883997	WGS
57014	Acinetobacter baumannii AB_1595-8	1.22125e+06	4017810	WGS
57014	Acinetobacter baumannii AB_1649-8	1.22125e+06	3772706	WGS
57014	Acinetobacter baumannii AB_1650-8	1.22125e+06	3777512	WGS
57014	Acinetobacter baumannii AB_1766_8	1.22125e+06	3978112	WGS
57014	Acinetobacter baumannii AB_2007-09-110-01-7	1.22125e+06	3907378	WGS
57014	Acinetobacter baumannii AB_2007-16-25-01-7	1.22125e+06	3948613	WGS
57014	Acinetobacter baumannii AB_2007-16-27-01	1.22125e+06	3957696	WGS
57014	Acinetobacter baumannii AB_2008-15-34-7	1.22126e+06	3891159	WGS
57014	Acinetobacter baumannii AB_2008-15-45	1.22126e+06	4081217	WGS
57014	Acinetobacter baumannii AB_2008-15-52	1.22126e+06	3794776	WGS
57014	Acinetobacter baumannii AB_2008-15-69	1.22126e+06	4125321	WGS
57014	Acinetobacter baumannii AB_2008-15-70	1.22126e+06	4070534	WGS
57014	Acinetobacter baumannii AB_2008-15-71	1.22126e+06	3868968	WGS
57014	Acinetobacter baumannii AB_2008-23-01-01-7	1.22126e+06	4017467	WGS
57014	Acinetobacter baumannii AB_2008-23-07-01-7	1.22126e+06	3967360	WGS
57014	Acinetobacter baumannii AB_2009-04-01-7	1.22126e+06	3820427	WGS
57014	Acinetobacter baumannii AB_2009-04-02-7	1.22126e+06	3951719	WGS
57014	Acinetobacter baumannii AB_515-8	1.22127e+06	4042297	WGS
57014	Acinetobacter baumannii AB_908-12	1.22127e+06	3976955	WGS
57014	Acinetobacter baumannii AB_908-13	1.22127e+06	3947185	WGS
57014	Acinetobacter baumannii AB_908-14-7	1.22127e+06	3810174	WGS
57014	Acinetobacter baumannii AB_909-01-7	1.22127e+06	3678625	WGS
57014	Acinetobacter baumannii AB_909-02-7	1.22127e+06	3905968	WGS
57014	Acinetobacter baumannii AB_909-05	1.22127e+06	4001114	WGS
57014	Acinetobacter baumannii AB_909-14-7	1.22127e+06	3928795	WGS
57014	Acinetobacter baumannii AB_TG19617	1.22127e+06	3872007	WGS
57014	Acinetobacter baumannii AB_TG2018	1.22127e+06	3951546	WGS
57014	Acinetobacter baumannii AB_TG2022	1.22128e+06	3913406	WGS
57014	Acinetobacter baumannii AB_TG2023	1.22128e+06	3923477	WGS
57014	Acinetobacter baumannii AB_TG2026	1.22128e+06	4026446	WGS
57014	Acinetobacter baumannii AB_TG2028	1.22128e+06	3757275	WGS
57014	Acinetobacter baumannii AB_TG2030	1.22128e+06	3730092	WGS
57014	Acinetobacter baumannii AB_TG2031	1.22128e+06	3769055	WGS
57014	Acinetobacter baumannii AB_TG2032	1.22128e+06	3493900	WGS
57014	Acinetobacter baumannii AB_TG2631	1.22128e+06	3756624	WGS
57014	Acinetobacter baumannii AB_TG27323	1.22128e+06	3940097	WGS
57014	Acinetobacter baumannii AB_TG27327	1.22128e+06	3995536	WGS
57014	Acinetobacter baumannii AB_TG27331	1.22129e+06	4034530	WGS
57014	Acinetobacter baumannii AB_TG27335	1.22129e+06	4031360	WGS
57014	Acinetobacter baumannii AB_TG27339	1.22129e+06	3962396	WGS
57014	Acinetobacter baumannii AB_TG27343	1.22129e+06	3975224	WGS
57014	Acinetobacter baumannii AB_TG5064	1.22129e+06	3689847	WGS
57014	Acinetobacter baumannii AC12	1.19811e+06	3830405	WGS
57014	Acinetobacter baumannii AC30	1.22475e+06	3907226	WGS
57014	Acinetobacter baumannii ACICU	405417	3996761	Complete
57014	Acinetobacter baumannii ANC 4097	1.21764e+06	4235983	WGS
57014	Acinetobacter baumannii ATCC 17978	400668	4001457	Complete
57014	Acinetobacter baumannii ATCC 19606 = CIP 70.34	575584	3962068	WGS
57014	Acinetobacter baumannii AYE	509174	4048735	Complete
57014	Acinetobacter baumannii Ab11111	1.16859e+06	4062506	WGS
57014	Acinetobacter baumannii Ab33333	1.16859e+06	3832931	WGS
57014	Acinetobacter baumannii Ab44444	1.16859e+06	3768579	WGS
57014	Acinetobacter baumannii AbH12O-A2	470.771	3875775	Complete
57014	Acinetobacter baumannii BJ1	470.534	3977574	WGS
57014	Acinetobacter baumannii BJ2	470.535	4015419	WGS
57014	Acinetobacter baumannii BJ3	470.536	3951629	WGS
57014	Acinetobacter baumannii BJ4	470.537	3962297	WGS
57014	Acinetobacter baumannii BJ5	470.538	4007238	WGS
57014	Acinetobacter baumannii BJ6	470.539	4031457	WGS
57014	Acinetobacter baumannii BJ7	470.54	4029679	WGS
57014	Acinetobacter baumannii BJ8	470.552	3862420	WGS
57014	Acinetobacter baumannii BJAB07104	1.097e+06	4042229	Complete
57014	Acinetobacter baumannii BJAB0715	1.097e+06	4053889	Complete
57014	Acinetobacter baumannii BJAB0868	1.097e+06	4005822	Complete
57014	Acinetobacter baumannii BZICU-2	1.21091e+06	3789410	WGS
57014	Acinetobacter baumannii CI77	1.34308e+06	4024372	WGS
57648	Acinetobacter baumannii CI78	1.34307e+06	3864517	WGS
57014	Acinetobacter baumannii CI79	1.34307e+06	4384434	WGS
57014	Acinetobacter baumannii CI86	1.34307e+06	4391650	WGS
57014	Acinetobacter baumannii Canada BC-5	903895	3998016	WGS
57014	Acinetobacter baumannii Canada BC1	903924	3931640	WGS
57014	Acinetobacter baumannii D1279779	945556	3647892	WGS
57014	Acinetobacter baumannii DU202	1.37013e+06	3843445	WGS
57014	Acinetobacter baumannii EGD-HP18	1.35841e+06	4094577	WGS
57014	Acinetobacter baumannii IOMTU 433	470.774	4190324	Complete
57014	Acinetobacter baumannii IS-116	903912	3947498	WGS
57014	Acinetobacter baumannii IS-123	903899	4061926	WGS
57014	Acinetobacter baumannii IS-143	903911	4011977	WGS
57014	Acinetobacter baumannii IS-235	903905	4054769	WGS
57014	Acinetobacter baumannii IS-251	903906	3993579	WGS
57014	Acinetobacter baumannii IS-58	903914	4051313	WGS
57014	Acinetobacter baumannii JCM 6841	1.23653e+06	3932400	WGS
57014	Acinetobacter baumannii LAC-4	1.45532e+06	3961090	WGS
57014	Acinetobacter baumannii LY1	1.45892e+06	3851580	WGS
57014	Acinetobacter baumannii LY2	1.45892e+06	3757210	WGS
57014	Acinetobacter baumannii LY3	1.45892e+06	3867100	WGS
57014	Acinetobacter baumannii LY4	1.45892e+06	4012700	WGS
57014	Acinetobacter baumannii LY5	1.45892e+06	3999990	WGS
57014	Acinetobacter baumannii LY6	1.45892e+06	4043540	WGS
57014	Acinetobacter baumannii LY7	1.45892e+06	4045880	WGS
57014	Acinetobacter baumannii LY8	1.45893e+06	4043890	WGS
57014	Acinetobacter baumannii LY9	1.45893e+06	4087030	WGS
57014	Acinetobacter baumannii MAR002	470.557	3717930	WGS
57014	Acinetobacter baumannii MDR-TJ	889738	3943262	WGS
57014	Acinetobacter baumannii MDR-ZJ06	497978	4011434	Complete
57014	Acinetobacter baumannii MDR_MMC4	1.43505e+06	3976365	WGS
57014	Acinetobacter baumannii MRSN 3405	1.40992e+06	4027480	WGS
57014	Acinetobacter baumannii MRSN 57	1.43421e+06	3928989	WGS
57014	Acinetobacter baumannii MRSN 58	1.40993e+06	3927656	WGS
57014	Acinetobacter baumannii MRY09-0642	1.34017e+06	3642197	WGS
57014	Acinetobacter baumannii MRY10-0558	1.34018e+06	3770019	WGS
57014	Acinetobacter baumannii MRY12-0277	1.34018e+06	3808355	WGS
57014	Acinetobacter baumannii MSP4-16	1.27807e+06	3933299	WGS
57014	Acinetobacter baumannii NCGM 237	1.40164e+06	4021920	Complete
57014	Acinetobacter baumannii NIPH 1362	1.21764e+06	4085773	WGS
57014	Acinetobacter baumannii NIPH 146	1.21764e+06	3929732	WGS
57014	Acinetobacter baumannii NIPH 1669	1.21764e+06	3860752	WGS
57014	Acinetobacter baumannii NIPH 1734	1.21764e+06	3911650	WGS
57014	Acinetobacter baumannii NIPH 190	1.21764e+06	3895514	WGS
57014	Acinetobacter baumannii NIPH 201	1.21763e+06	4103333	WGS
57014	Acinetobacter baumannii NIPH 2061	1.21765e+06	3970958	WGS
57014	Acinetobacter baumannii NIPH 24	1.21765e+06	3888469	WGS
57014	Acinetobacter baumannii NIPH 290	1.21763e+06	4015759	WGS
57014	Acinetobacter baumannii NIPH 329	1.21763e+06	3994296	WGS
57014	Acinetobacter baumannii NIPH 335	1.21763e+06	3923854	WGS
57014	Acinetobacter baumannii NIPH 410	1.21763e+06	4029126	WGS
57014	Acinetobacter baumannii NIPH 527	1.21764e+06	4138781	WGS
57014	Acinetobacter baumannii NIPH 528	1.21764e+06	3869750	WGS
57014	Acinetobacter baumannii NIPH 60	1.21765e+06	3932728	WGS
57014	Acinetobacter baumannii NIPH 601	1.21764e+06	4018850	WGS
57014	Acinetobacter baumannii NIPH 615	1.21764e+06	3934696	WGS
57014	Acinetobacter baumannii NIPH 67	1.21763e+06	4046471	WGS
57014	Acinetobacter baumannii NIPH 70	1.21763e+06	3920156	WGS
57014	Acinetobacter baumannii NIPH 80	1.21763e+06	3956746	WGS
57014	Acinetobacter baumannii Naval-113	903920	4076039	WGS
57014	Acinetobacter baumannii Naval-13	903904	4102347	WGS
57014	Acinetobacter baumannii Naval-17	903896	4004423	WGS
57014	Acinetobacter baumannii Naval-18	903897	4469025	WGS
57014	Acinetobacter baumannii Naval-2	903922	4119762	WGS
57014	Acinetobacter baumannii Naval-21	903923	3919883	WGS
57014	Acinetobacter baumannii Naval-57	903927	3927912	WGS
57014	Acinetobacter baumannii Naval-72	903908	3833100	WGS
57014	Acinetobacter baumannii Naval-78	903936	4044084	WGS
57014	Acinetobacter baumannii Naval-81	903898	4096158	WGS
57014	Acinetobacter baumannii Naval-82	903921	3898651	WGS
57014	Acinetobacter baumannii Naval-83	903909	4101426	WGS
57014	Acinetobacter baumannii OIFC0162	903907	4075323	WGS
57323	Acinetobacter baumannii OIFC021	903928	4069090	WGS
57014	Acinetobacter baumannii OIFC032	903890	3901578	WGS
57014	Acinetobacter baumannii OIFC035	903926	3968283	WGS
57014	Acinetobacter baumannii OIFC047	903933	3738278	WGS
57014	Acinetobacter baumannii OIFC065	903932	4025125	WGS
57014	Acinetobacter baumannii OIFC074	903901	3659574	WGS
57014	Acinetobacter baumannii OIFC087	903929	3997951	WGS
57014	Acinetobacter baumannii OIFC098	903902	3800928	WGS
57014	Acinetobacter baumannii OIFC099	903930	3907907	WGS
57014	Acinetobacter baumannii OIFC109	903892	4107121	WGS
57014	Acinetobacter baumannii OIFC110	903910	3976153	WGS
57014	Acinetobacter baumannii OIFC111	903935	3984447	WGS
57014	Acinetobacter baumannii OIFC137	903889	4081420	WGS
57014	Acinetobacter baumannii OIFC143	903893	4441327	WGS
57014	Acinetobacter baumannii OIFC180	903903	3969657	WGS
57014	Acinetobacter baumannii OIFC189	903894	4041198	WGS
57014	Acinetobacter baumannii OIFC338	903934	4143832	WGS
57014	Acinetobacter baumannii Pulsotype 27	1.44976e+06	4031410	WGS
57014	Acinetobacter baumannii R1B	1.45532e+06	4254810	WGS
57014	Acinetobacter baumannii SDF	509171	3477996	Complete
57014	Acinetobacter baumannii T122	470.567	3938080	WGS
57014	Acinetobacter baumannii T173	470.568	3936842	WGS
57014	Acinetobacter baumannii T185	470.562	3981483	WGS
57014	Acinetobacter baumannii T188	470.563	3976636	WGS
57014	Acinetobacter baumannii T214	470.569	3793859	WGS
57014	Acinetobacter baumannii T229	470.564	3673380	WGS
57014	Acinetobacter baumannii T25	470.533	3855815	WGS
57014	Acinetobacter baumannii T258	470.565	3943010	WGS
57014	Acinetobacter baumannii T271	470.566	3860407	WGS
57014	Acinetobacter baumannii T7	470.561	3938556	WGS
57014	Acinetobacter baumannii T87	470.56	3878071	WGS
57014	Acinetobacter baumannii TCDC-AB0715	980514	4210417	Complete
57014	Acinetobacter baumannii TG00314	1.31513e+06	4049304	WGS
57014	Acinetobacter baumannii TG02011	1.31514e+06	4024905	WGS
57014	Acinetobacter baumannii TG02017	1.31514e+06	3984711	WGS
57014	Acinetobacter baumannii TG07725	1.31514e+06	3944482	WGS
57014	Acinetobacter baumannii TG15233	1.31514e+06	3922629	WGS
57014	Acinetobacter baumannii TG15234	1.31514e+06	4011322	WGS
57014	Acinetobacter baumannii TG15236	1.31514e+06	4143990	WGS
57014	Acinetobacter baumannii TG15237	1.31514e+06	3774429	WGS
57014	Acinetobacter baumannii TG15238	1.31514e+06	3903498	WGS
57014	Acinetobacter baumannii TG15239	1.31514e+06	3904569	WGS
57014	Acinetobacter baumannii TG15240	1.31514e+06	3887975	WGS
57014	Acinetobacter baumannii TG15241	1.31515e+06	3885633	WGS
57014	Acinetobacter baumannii TG15242	1.31515e+06	3872308	WGS
57014	Acinetobacter baumannii TG19582	1.22129e+06	3758275	WGS
57014	Acinetobacter baumannii TG2012	1.31515e+06	3832392	WGS
57014	Acinetobacter baumannii TG2013	1.31515e+06	4234076	WGS
57014	Acinetobacter baumannii TG2014	1.31515e+06	4230486	WGS
57014	Acinetobacter baumannii TG20277	1.31515e+06	4109878	WGS
57014	Acinetobacter baumannii TG20546	1.31515e+06	3890723	WGS
57014	Acinetobacter baumannii TG22110	1.31515e+06	3978665	WGS
57014	Acinetobacter baumannii TG22112	1.31516e+06	4371735	WGS
57014	Acinetobacter baumannii TG22142	1.31516e+06	4228985	WGS
57014	Acinetobacter baumannii TG22146	1.31516e+06	4241168	WGS
57014	Acinetobacter baumannii TG22148	1.31516e+06	4311931	WGS
57014	Acinetobacter baumannii TG22150	1.31516e+06	3974371	WGS
57014	Acinetobacter baumannii TG22190	1.31516e+06	4120289	WGS
57014	Acinetobacter baumannii TG22192	1.31516e+06	3949512	WGS
57014	Acinetobacter baumannii TG22194	1.31516e+06	4130037	WGS
57014	Acinetobacter baumannii TG22196	1.31516e+06	3990644	WGS
57014	Acinetobacter baumannii TG22198	1.31516e+06	4487000	WGS
57014	Acinetobacter baumannii TG22202	1.31517e+06	4206800	WGS
57014	Acinetobacter baumannii TG22204	1.31517e+06	3840577	WGS
57014	Acinetobacter baumannii TG22212	1.31517e+06	3828653	WGS
57014	Acinetobacter baumannii TG22214	1.31517e+06	3884890	WGS
57014	Acinetobacter baumannii TG22332	1.31517e+06	4079860	WGS
57014	Acinetobacter baumannii TG22336	1.31517e+06	4157702	WGS
57014	Acinetobacter baumannii TG27295	1.31517e+06	3897535	WGS
57014	Acinetobacter baumannii TG27299	1.31517e+06	4059944	WGS
57014	Acinetobacter baumannii TG27307	1.31517e+06	4461235	WGS
57014	Acinetobacter baumannii TG27311	1.31517e+06	4391532	WGS
57014	Acinetobacter baumannii TG27315	1.31518e+06	4085389	WGS
57014	Acinetobacter baumannii TG27319	1.31518e+06	4070901	WGS
57014	Acinetobacter baumannii TG27371	1.31518e+06	4062825	WGS
57014	Acinetobacter baumannii TG27379	1.31518e+06	4156806	WGS
57014	Acinetobacter baumannii TG27383	1.31518e+06	4002092	WGS
57014	Acinetobacter baumannii TG27387	1.31518e+06	3924648	WGS
57014	Acinetobacter baumannii TG27391	1.31518e+06	3672733	WGS
57014	Acinetobacter baumannii TG27395	1.31518e+06	3982552	WGS
57014	Acinetobacter baumannii TG27399	1.31518e+06	4003540	WGS
57014	Acinetobacter baumannii TG27407	1.31518e+06	4160493	WGS
57014	Acinetobacter baumannii TG27411	1.31519e+06	4152679	WGS
57014	Acinetobacter baumannii TYTH-1	1.10084e+06	3957368	Complete
57014	Acinetobacter baumannii TYTH-2	1.10084e+06	3879846	WGS
57014	Acinetobacter baumannii TYTH-3	1.10084e+06	3719171	WGS
57014	Acinetobacter baumannii TYTH-4	1.10084e+06	3938769	WGS
57014	Acinetobacter baumannii TYTH-5	1.10085e+06	3788292	WGS
57014	Acinetobacter baumannii TYTH-6	1.10085e+06	3944163	WGS
57014	Acinetobacter baumannii TYTH-7	1.10085e+06	3682288	WGS
57014	Acinetobacter baumannii UH0207	1.39894e+06	3785862	WGS
57014	Acinetobacter baumannii UH0707	1.39894e+06	4007096	WGS
57014	Acinetobacter baumannii UH0807	1.39895e+06	4007572	WGS
57014	Acinetobacter baumannii UH10007	1.39895e+06	4051316	WGS
57014	Acinetobacter baumannii UH1007	1.39895e+06	3973300	WGS
57014	Acinetobacter baumannii UH10107	1.39895e+06	3990371	WGS
57014	Acinetobacter baumannii UH106_429	470.664	3948574	WGS
57014	Acinetobacter baumannii UH106_440	470.662	3952625	WGS
57014	Acinetobacter baumannii UH106_447	470.659	3905996	WGS
57014	Acinetobacter baumannii UH10707	1.39895e+06	3972531	WGS
57014	Acinetobacter baumannii UH10707 [PRJNA227030]	1.39895e+06	4156196	WGS
57014	Acinetobacter baumannii UH11608	1.39895e+06	3873593	WGS
57014	Acinetobacter baumannii UH12208	1.39895e+06	4093256	WGS
57014	Acinetobacter baumannii UH12308	1.39895e+06	3943060	WGS
57014	Acinetobacter baumannii UH12408	1.39895e+06	3841500	WGS
57014	Acinetobacter baumannii UH126_102	470.733	3926700	WGS
57014	Acinetobacter baumannii UH126_106	470.731	3937434	WGS
57014	Acinetobacter baumannii UH126_137	470.727	4004114	WGS
57014	Acinetobacter baumannii UH12808	1.39895e+06	3851798	WGS
57014	Acinetobacter baumannii UH129_404	470.679	4166615	WGS
57014	Acinetobacter baumannii UH129_408	470.678	4171341	WGS
57014	Acinetobacter baumannii UH129_409	470.677	4156017	WGS
57014	Acinetobacter baumannii UH129_415	470.675	4153999	WGS
57014	Acinetobacter baumannii UH134_167	470.722	4160576	WGS
57014	Acinetobacter baumannii UH134_168	470.721	4181554	WGS
57014	Acinetobacter baumannii UH134_192	470.718	4180473	WGS
57014	Acinetobacter baumannii UH13908	1.39896e+06	3770600	WGS
57014	Acinetobacter baumannii UH14508	1.39896e+06	4179525	WGS
57014	Acinetobacter baumannii UH149_188	470.719	4175518	WGS
57014	Acinetobacter baumannii UH149_200	470.716	3923583	WGS
57014	Acinetobacter baumannii UH149_222	470.714	4155092	WGS
57014	Acinetobacter baumannii UH15208	1.39896e+06	4194341	WGS
57014	Acinetobacter baumannii UH16008	1.39896e+06	4197362	WGS
57014	Acinetobacter baumannii UH16108	1.39896e+06	3850720	WGS
57014	Acinetobacter baumannii UH16208	1.39896e+06	4095234	WGS
57014	Acinetobacter baumannii UH175_677	470.626	3963086	WGS
57014	Acinetobacter baumannii UH175_679	470.625	3863031	WGS
57014	Acinetobacter baumannii UH17_182	470.72	4032301	WGS
57014	Acinetobacter baumannii UH17_202	470.715	4033072	WGS
57014	Acinetobacter baumannii UH17_465	470.654	4015376	WGS
57014	Acinetobacter baumannii UH17_52	470.758	4007789	WGS
57014	Acinetobacter baumannii UH184_295	470.7	4139722	WGS
57014	Acinetobacter baumannii UH184_309	470.696	3929256	WGS
57014	Acinetobacter baumannii UH184_310	470.695	3922467	WGS
57014	Acinetobacter baumannii UH18608	1.39896e+06	3898491	WGS
57014	Acinetobacter baumannii UH189_348	470.69	3974023	WGS
57014	Acinetobacter baumannii UH189_349	470.689	4182822	WGS
57014	Acinetobacter baumannii UH189_355	470.688	4001383	WGS
57014	Acinetobacter baumannii UH195_560	470.634	3868662	WGS
57014	Acinetobacter baumannii UH195_568	470.632	3929656	WGS
57014	Acinetobacter baumannii UH195_573	470.63	3961474	WGS
57014	Acinetobacter baumannii UH19608	1.39896e+06	4025125	WGS
57014	Acinetobacter baumannii UH19908	1.39896e+06	4183320	WGS
57014	Acinetobacter baumannii UH20108	1.39896e+06	3864448	WGS
57014	Acinetobacter baumannii UH225_472	470.651	4075749	WGS
57014	Acinetobacter baumannii UH225_492	470.642	4057398	WGS
57014	Acinetobacter baumannii UH225_493	470.641	4054728	WGS
57014	Acinetobacter baumannii UH22908	1.39897e+06	4013487	WGS
57014	Acinetobacter baumannii UH2307	1.39897e+06	3954368	WGS
57014	Acinetobacter baumannii UH236_84	470.743	3907803	WGS
57014	Acinetobacter baumannii UH236_85	470.742	3895562	WGS
57014	Acinetobacter baumannii UH236_87	470.741	3919134	WGS
57014	Acinetobacter baumannii UH243_14	470.766	4038180	WGS
57014	Acinetobacter baumannii UH243_43	470.759	4050930	WGS
57014	Acinetobacter baumannii UH243_54	470.757	4039692	WGS
57014	Acinetobacter baumannii UH243_55	470.756	4040169	WGS
57014	Acinetobacter baumannii UH243_56	470.755	4041787	WGS
57014	Acinetobacter baumannii UH243_57	470.754	4040147	WGS
57014	Acinetobacter baumannii UH243_66	470.748	4041412	WGS
57014	Acinetobacter baumannii UH243_68	470.747	4043111	WGS
57014	Acinetobacter baumannii UH243_73	470.746	4040243	WGS
57014	Acinetobacter baumannii UH2707	1.39897e+06	4000454	WGS
57014	Acinetobacter baumannii UH280_81	470.744	4181944	WGS
57014	Acinetobacter baumannii UH280_92	470.74	4183494	WGS
57014	Acinetobacter baumannii UH280_93	470.739	4179832	WGS
57014	Acinetobacter baumannii UH280_99	470.736	4195822	WGS
57014	Acinetobacter baumannii UH2907	1.39897e+06	4009389	WGS
57014	Acinetobacter baumannii UH293_373	470.685	3847629	WGS
57014	Acinetobacter baumannii UH293_377	470.684	4146081	WGS
57014	Acinetobacter baumannii UH293_412	470.676	4144942	WGS
57014	Acinetobacter baumannii UH299_338	470.693	4055156	WGS
57014	Acinetobacter baumannii UH299_341	470.692	4180224	WGS
57014	Acinetobacter baumannii UH299_342	470.691	4251803	WGS
57014	Acinetobacter baumannii UH315_100	470.735	4044514	WGS
57014	Acinetobacter baumannii UH315_101	470.734	4073434	WGS
57014	Acinetobacter baumannii UH315_39	470.761	4023311	WGS
57014	Acinetobacter baumannii UH315_58	470.753	4020422	WGS
57014	Acinetobacter baumannii UH326_461	470.655	4032397	WGS
57014	Acinetobacter baumannii UH326_495	470.64	3994152	WGS
57014	Acinetobacter baumannii UH348_13	470.767	4036449	WGS
57014	Acinetobacter baumannii UH348_25	470.765	3848456	WGS
57014	Acinetobacter baumannii UH348_27	470.764	4045783	WGS
57014	Acinetobacter baumannii UH355_545	470.638	3979330	WGS
57014	Acinetobacter baumannii UH355_546	470.637	4247470	WGS
57014	Acinetobacter baumannii UH355_569	470.631	4158088	WGS
57014	Acinetobacter baumannii UH367_548	470.636	4046403	WGS
57014	Acinetobacter baumannii UH367_558	470.635	3883938	WGS
57014	Acinetobacter baumannii UH367_565	470.633	4047282	WGS
57014	Acinetobacter baumannii UH370_269	470.708	3986594	WGS
57014	Acinetobacter baumannii UH370_270	470.707	4367492	WGS
57014	Acinetobacter baumannii UH370_301	470.697	4025533	WGS
57014	Acinetobacter baumannii UH3807	1.39897e+06	3775778	WGS
57014	Acinetobacter baumannii UH381_467	470.652	4010751	WGS
57014	Acinetobacter baumannii UH381_482	470.649	4257908	WGS
57014	Acinetobacter baumannii UH384_444	470.661	3890774	WGS
57014	Acinetobacter baumannii UH384_450	470.658	3895482	WGS
56630	Acinetobacter baumannii UH392_536	470.639	3954119	WGS
57014	Acinetobacter baumannii UH392_659	470.628	4121674	WGS
57014	Acinetobacter baumannii UH392_684	470.624	3834624	WGS
57014	Acinetobacter baumannii UH410_103	470.732	3830388	WGS
57014	Acinetobacter baumannii UH410_108	470.73	3861847	WGS
57014	Acinetobacter baumannii UH410_128	470.729	3867346	WGS
57014	Acinetobacter baumannii UH410_96	470.737	3865415	WGS
57014	Acinetobacter baumannii UH41_486	470.648	3997193	WGS
57014	Acinetobacter baumannii UH41_487	470.647	3996523	WGS
57014	Acinetobacter baumannii UH41_488	470.646	3989024	WGS
57014	Acinetobacter baumannii UH41_489	470.645	3992096	WGS
57014	Acinetobacter baumannii UH41_490	470.644	3985843	WGS
57014	Acinetobacter baumannii UH41_491	470.643	3990174	WGS
57014	Acinetobacter baumannii UH430_459	470.656	4107430	WGS
57014	Acinetobacter baumannii UH430_466	470.653	4026045	WGS
57014	Acinetobacter baumannii UH430_478	470.65	3903950	WGS
57014	Acinetobacter baumannii UH437_147	470.726	4005599	WGS
57014	Acinetobacter baumannii UH437_148	470.725	4055277	WGS
57014	Acinetobacter baumannii UH437_149	470.724	4028626	WGS
57014	Acinetobacter baumannii UH455_38	470.762	3791675	WGS
57014	Acinetobacter baumannii UH455_6	470.768	3801383	WGS
57014	Acinetobacter baumannii UH455_61	470.752	4039620	WGS
57014	Acinetobacter baumannii UH455_62	470.751	3866492	WGS
57014	Acinetobacter baumannii UH475_197	470.717	4184917	WGS
57014	Acinetobacter baumannii UH475_239	470.713	4190905	WGS
57014	Acinetobacter baumannii UH484_133	470.728	4044200	WGS
57014	Acinetobacter baumannii UH484_311	470.694	4042246	WGS
57014	Acinetobacter baumannii UH484_95	470.738	4242850	WGS
57014	Acinetobacter baumannii UH487_41	470.76	4040464	WGS
57014	Acinetobacter baumannii UH487_63	470.75	4039969	WGS
57014	Acinetobacter baumannii UH487_64	470.749	4040323	WGS
57014	Acinetobacter baumannii UH487_78	470.745	4042789	WGS
57014	Acinetobacter baumannii UH507_247	470.711	4146901	WGS
57014	Acinetobacter baumannii UH507_263	470.71	4156821	WGS
57014	Acinetobacter baumannii UH507_300	470.698	4198956	WGS
57014	Acinetobacter baumannii UH5107	1.39897e+06	3974638	WGS
57014	Acinetobacter baumannii UH514_287	470.702	3951134	WGS
57014	Acinetobacter baumannii UH514_288	470.701	3873050	WGS
57014	Acinetobacter baumannii UH5207	1.39897e+06	3995972	WGS
57014	Acinetobacter baumannii UH5307	1.39897e+06	4178640	WGS
57014	Acinetobacter baumannii UH532_386	470.683	4183282	WGS
57014	Acinetobacter baumannii UH532_387	470.682	4204958	WGS
57014	Acinetobacter baumannii UH532_392	470.68	4242128	WGS
57014	Acinetobacter baumannii UH535_418	470.674	3822513	WGS
57014	Acinetobacter baumannii UH535_419	470.673	3825204	WGS
57014	Acinetobacter baumannii UH5707	1.39897e+06	4020224	WGS
57014	Acinetobacter baumannii UH588_656	470.629	4079365	WGS
57014	Acinetobacter baumannii UH588_663	470.627	3960200	WGS
57014	Acinetobacter baumannii UH6107	1.39898e+06	4033723	WGS
57014	Acinetobacter baumannii UH6207	1.39898e+06	3852926	WGS
57014	Acinetobacter baumannii UH6507	1.39898e+06	3751172	WGS
57014	Acinetobacter baumannii UH66_241	470.712	3875808	WGS
57014	Acinetobacter baumannii UH66_268	470.709	3873867	WGS
57014	Acinetobacter baumannii UH66_276	470.706	3849616	WGS
57014	Acinetobacter baumannii UH6907	1.39898e+06	3996767	WGS
57014	Acinetobacter baumannii UH7007	1.39898e+06	3891099	WGS
57014	Acinetobacter baumannii UH71_277	470.705	4138740	WGS
57014	Acinetobacter baumannii UH71_278	470.704	4161065	WGS
57014	Acinetobacter baumannii UH71_279	470.703	4145799	WGS
57014	Acinetobacter baumannii UH71_296	470.699	4167283	WGS
57014	Acinetobacter baumannii UH7607	1.39898e+06	3890865	WGS
57014	Acinetobacter baumannii UH7707	1.39898e+06	4004325	WGS
57014	Acinetobacter baumannii UH7807	1.39898e+06	4028650	WGS
57014	Acinetobacter baumannii UH7907	1.39898e+06	3990013	WGS
57014	Acinetobacter baumannii UH8107	1.39898e+06	4185639	WGS
57014	Acinetobacter baumannii UH81_364	470.687	3977313	WGS
57014	Acinetobacter baumannii UH81_366	470.686	4035765	WGS
57014	Acinetobacter baumannii UH81_389	470.681	4051047	WGS
57014	Acinetobacter baumannii UH81_452	470.657	4056630	WGS
57014	Acinetobacter baumannii UH8407	1.39899e+06	3899417	WGS
57014	Acinetobacter baumannii UH8707	1.39899e+06	3899743	WGS
57014	Acinetobacter baumannii UH8807	1.39899e+06	3900733	WGS
57014	Acinetobacter baumannii UH8907	1.39899e+06	3902555	WGS
57014	Acinetobacter baumannii UH9007	1.39899e+06	4162855	WGS
57014	Acinetobacter baumannii UH9907	1.39899e+06	4188361	WGS
57014	Acinetobacter baumannii UH9907 [PRJNA227028]	1.39899e+06	4344908	WGS
57014	Acinetobacter baumannii UMB001	933263	3997654	WGS
57014	Acinetobacter baumannii UMB002	933264	3918360	WGS
57014	Acinetobacter baumannii UMB003	933265	4176413	WGS
57014	Acinetobacter baumannii W6976	981328	3846714	WGS
57014	Acinetobacter baumannii W7282	981329	3935598	WGS
57660	Acinetobacter baumannii WC-136	903916	4150349	WGS
62478	Acinetobacter baumannii WC-141	903915	3926998	WGS
57698	Acinetobacter baumannii WC-323	903918	4041640	WGS
57014	Acinetobacter baumannii WC-348	903919	4105021	WGS
57323	Acinetobacter baumannii WC-487	903917	4104481	WGS
57014	Acinetobacter baumannii WC-692	903913	4175732	WGS
57014	Acinetobacter baumannii WC-A-694	903925	4000521	WGS
57014	Acinetobacter baumannii WC-A-92	903931	3833221	WGS
57014	Acinetobacter baumannii WM99c	945555	4028288	WGS
57014	Acinetobacter baumannii ZW85-1	1.40087e+06	3876878	Complete
57014	Acinetobacter baumannii ZWS1122	1.22356e+06	3933118	WGS
57014	Acinetobacter baumannii ZWS1219	1.22414e+06	3940087	WGS
57014	Acinetobacter baumannii str. Perm	1.34982e+06	3651116	WGS
46310	Acinetobacter baylyi DSM 14961 = CIP 107474	1.12092e+06	3592036	WGS
46310	Acinetobacter baylyi TG19579	1.22129e+06	3721671	WGS
57526	Acinetobacter beijerinckii ANC 3835	1.21765e+06	3531858	WGS
57526	Acinetobacter beijerinckii CIP 110307	1.21765e+06	3556901	WGS
56370	Acinetobacter bereziniae	106649	4869490	WGS
56370	Acinetobacter bereziniae CIP 70.12	1.21765e+06	4945626	WGS
56370	Acinetobacter bereziniae LMG 1003	981324	4940108	WGS
56370	Acinetobacter bereziniae NIPH 3	1.21765e+06	4920518	WGS
44754	Acinetobacter bouvetii DSM 14964 = CIP 107468 [PRJNA199256]	1.12093e+06	3349471	WGS
44754	Acinetobacter bouvetii DSM 14964 = CIP 107468 [PRJNA201594]	1.12093e+06	3368665	WGS
43461	Acinetobacter brisouii ANC 4119	1.21765e+06	3107277	WGS
43461	Acinetobacter brisouii CIP 110357	1.34168e+06	3139093	WGS
57657	Acinetobacter calcoaceticus ANC 3680	1.21765e+06	4070387	WGS
59553	Acinetobacter calcoaceticus ANC 3811	1.21769e+06	3823618	WGS
57657	Acinetobacter calcoaceticus DSM 30006 = CIP 81.8	981331	3850896	WGS
57657	Acinetobacter calcoaceticus NIPH 13	1.21765e+06	3922088	WGS
57657	Acinetobacter calcoaceticus P23	471.9	4058823	WGS
57660	Acinetobacter calcoaceticus PHEA-2	871585	3862530	Complete
57657	Acinetobacter calcoaceticus RUH2202	575585	3876196	WGS
57657	Acinetobacter calcoaceticus TG19585	1.22129e+06	3798500	WGS
57657	Acinetobacter calcoaceticus TG19588	1.22129e+06	3888440	WGS
57657	Acinetobacter calcoaceticus TG19593	1.2213e+06	3901341	WGS
57660	Acinetobacter calcoaceticus subsp. anitratus XM1570	1.23583e+06	4220366	WGS
57323	Acinetobacter genomosp. 13TU str. NCTC 8102	981325	4089227	WGS
57660	Acinetobacter genomosp. 3 str. DSM 21653	981326	3698267	WGS
57660	Acinetobacter genomosp. 3 str. DSM 9306	981332	3943593	WGS
44753	Acinetobacter gerneri	202952	4384110	WGS
44753	Acinetobacter gerneri DSM 14967 = CIP 107464	1.12093e+06	4504710	WGS
44753	Acinetobacter gerneri MTCC 9824	1.33004e+06	4393829	WGS
58233	Acinetobacter guillouiae	106650	3293550	WGS
57629	Acinetobacter guillouiae CIP 63.46	1.21766e+06	4856557	WGS
57629	Acinetobacter guillouiae MSP4-18	1.33004e+06	4837115	WGS
57629	Acinetobacter guillouiae NIPH 991	1.21766e+06	4877235	WGS
56301	Acinetobacter gyllenbergii CIP 110306	1.21766e+06	4295512	WGS
56301	Acinetobacter gyllenbergii MTCC 11365	1.33004e+06	4304478	WGS
56301	Acinetobacter gyllenbergii NIPH 230	1.21766e+06	4409027	WGS
57250	Acinetobacter haemolyticus ATCC 19194	707232	3692931	WGS
57250	Acinetobacter haemolyticus CIP 64.3	1.21766e+06	3483482	WGS
57250	Acinetobacter haemolyticus MTCC 9819	1.33166e+06	3355019	WGS
57250	Acinetobacter haemolyticus NIPH 261	1.21799e+06	3517917	WGS
57250	Acinetobacter haemolyticus TG19599	1.2213e+06	3335458	WGS
57250	Acinetobacter haemolyticus TG19602	1.2213e+06	3510997	WGS
57250	Acinetobacter haemolyticus TG21157	1.2213e+06	3288528	WGS
60227	Acinetobacter harbinensis HITLi 7	1.35394e+06	2899785	WGS
57156	Acinetobacter indicus ANC 4215	1.21766e+06	3168150	WGS
57156	Acinetobacter indicus CIP 110367	1.34168e+06	3209181	WGS
58178	Acinetobacter johnsonii ANC 3681	1.21766e+06	3536698	WGS
58178	Acinetobacter johnsonii CIP 64.6	1.21766e+06	3582699	WGS
58178	Acinetobacter johnsonii SH046	575586	3679697	WGS
58178	Acinetobacter johnsonii TG19605	1.2213e+06	3502274	WGS
58178	Acinetobacter johnsonii TG19625	1.2213e+06	3594793	WGS
57406	Acinetobacter junii CIP 107470	1.21767e+06	3705684	WGS
57406	Acinetobacter junii CIP 64.5	1.21766e+06	3328777	WGS
57406	Acinetobacter junii L20	40215.4	3199812	WGS
57406	Acinetobacter junii MTCC 11364	1.33005e+06	3536364	WGS
57406	Acinetobacter junii NIPH 182	1.21767e+06	3306847	WGS
57406	Acinetobacter junii SH205	575587	3454656	WGS
57406	Acinetobacter junii TG19608	1.22131e+06	3245101	WGS
58233	Acinetobacter lwoffii CIP 70.31	1.21767e+06	3544775	WGS
58233	Acinetobacter lwoffii NCTC 5866 = CIP 64.10	981327	3312451	WGS
59552	Acinetobacter lwoffii NIPH 478	1.21767e+06	3276129	WGS
58233	Acinetobacter lwoffii NIPH 512	1.40035e+06	3382003	WGS
58233	Acinetobacter lwoffii NIPH 715	1.21767e+06	3396432	WGS
58233	Acinetobacter lwoffii SH145	575588	3462137	WGS
58233	Acinetobacter lwoffii TG19636	1.22131e+06	3471406	WGS
58178	Acinetobacter lwoffii WJ10621	1.04663e+06	3180031	WGS
60345	Acinetobacter nectaris CIP 110549	1.39254e+06	2665799	WGS
57323	Acinetobacter nosocomialis 28F	1.14713e+06	4188328	WGS
57323	Acinetobacter nosocomialis Ab22222	1.18316e+06	3992183	WGS
57323	Acinetobacter nosocomialis M2	1.34307e+06	3782411	WGS
57323	Acinetobacter nosocomialis NIPH 2119	1.21767e+06	3878652	WGS
57323	Acinetobacter nosocomialis NIPH 386	1.21799e+06	4033353	WGS
57323	Acinetobacter nosocomialis T228	106654	3791806	WGS
57323	Acinetobacter nosocomialis TG19596	1.2213e+06	3775225	WGS
57323	Acinetobacter nosocomialis TG21145	1.22131e+06	4097506	WGS
57892	Acinetobacter oleivorans CIP 110421	1.39191e+06	4135709	WGS
57892	Acinetobacter oleivorans DR1	436717	4152543	Complete
59248	Acinetobacter oleivorans PF1	1.14816e+06	3766469	WGS
58065	Acinetobacter parvus DSM 16617 = CIP 108168	981333	2836375	WGS
58065	Acinetobacter parvus NIPH 1103	1.21767e+06	2962498	WGS
57660	Acinetobacter pittii 42F	1.14713e+06	4087312	WGS
57660	Acinetobacter pittii ANC 3678	1.21767e+06	3948092	WGS
59554	Acinetobacter pittii ANC 4050	1.21769e+06	3830117	WGS
57648	Acinetobacter pittii ANC 4052	1.21769e+06	3947597	WGS
57660	Acinetobacter pittii CIP 70.29	1.21767e+06	3790541	WGS
57660	Acinetobacter pittii CR12-42	48296.2	4372178	WGS
57660	Acinetobacter pittii D499	1.08601e+06	4101466	WGS
57660	Acinetobacter pittii T167	48296.2	4357452	WGS
57660	Acinetobacter pittii TE2	48296.2	3811215	WGS
57660	Acinetobacter pittii TG6411	1.22131e+06	3910736	WGS
56211	Acinetobacter radioresistens DSM 6976 = NBRC 102413 = CIP 103788	981334	3278511	WGS
56211	Acinetobacter radioresistens DSM 6976 = NBRC 102413 = CIP 103788	981334	3353674	WGS
56211	Acinetobacter radioresistens NIPH 2130	1.21767e+06	3157720	WGS
56211	Acinetobacter radioresistens SH164	575589	3154824	WGS
56211	Acinetobacter radioresistens SK82	596318	3274578	WGS
56211	Acinetobacter radioresistens TG02010	1.22131e+06	3056566	WGS
56211	Acinetobacter radioresistens WC-A-157	903900	3209605	WGS
61490	Acinetobacter rudis CIP 110305	421052	3999170	WGS
57376	Acinetobacter schindleri CIP 107287	1.21799e+06	3354622	WGS
57376	Acinetobacter schindleri NIPH 900	1.21768e+06	3402727	WGS
57376	Acinetobacter schindleri TG19614	1.22131e+06	3145589	WGS
56206	Acinetobacter soli CIP 110264	1.21768e+06	3350586	WGS
56206	Acinetobacter soli NIPH 2899	1.21768e+06	3448474	WGS
56206	Acinetobacter soli TCM341	1.45123e+06	3498150	WGS
57660	Acinetobacter sp. 528	1.2213e+06	4011446	WGS
60880	Acinetobacter sp. A47	1.56122e+06	3913495	WGS
46310	Acinetobacter sp. ADP1	62977.6	3598621	Complete
59561	Acinetobacter sp. ANC 3789	1.21771e+06	3237047	WGS
57696	Acinetobacter sp. ANC 3862	1.21771e+06	3776605	WGS
58209	Acinetobacter sp. ANC 3880	1.2177e+06	4292288	WGS
59557	Acinetobacter sp. ANC 3929	1.21771e+06	4239029	WGS
59562	Acinetobacter sp. ANC 3994	1.21772e+06	3646023	WGS
58244	Acinetobacter sp. ANC 4105	1.2177e+06	4096155	WGS
57250	Acinetobacter sp. ATCC 27244	525244	3408103	WGS
57376	Acinetobacter sp. CIP 101934	1.14466e+06	3186404	WGS
58233	Acinetobacter sp. CIP 101966	1.14466e+06	3484930	WGS
58065	Acinetobacter sp. CIP 102082	1.14466e+06	2932897	WGS
58065	Acinetobacter sp. CIP 102129	1.14466e+06	2937903	WGS
58233	Acinetobacter sp. CIP 102136	1.14467e+06	3558650	WGS
58065	Acinetobacter sp. CIP 102143	1.14467e+06	2958387	WGS
58065	Acinetobacter sp. CIP 102159	1.14467e+06	2873983	WGS
58065	Acinetobacter sp. CIP 102529	1.14467e+06	2986077	WGS
58065	Acinetobacter sp. CIP 102637	1.14467e+06	2741701	WGS
59555	Acinetobacter sp. CIP 110321	1.2177e+06	4268731	WGS
59235	Acinetobacter sp. CIP 51.11	1.14467e+06	3133520	WGS
57156	Acinetobacter sp. CIP 53.82	1.14467e+06	3120246	WGS
58209	Acinetobacter sp. CIP 56.2	1.14467e+06	4312179	WGS
43453	Acinetobacter sp. CIP 64.2	1.21769e+06	3987982	WGS
58233	Acinetobacter sp. CIP 64.7	1.14467e+06	3605795	WGS
58209	Acinetobacter sp. CIP 70.18	1.2177e+06	4568329	WGS
58233	Acinetobacter sp. CIP A162	1.14467e+06	3355944	WGS
57689	Acinetobacter sp. CIP-A165	40373.3	3500264	WGS
57626	Acinetobacter sp. COS3	1.39753e+06	3423773	WGS
57629	Acinetobacter sp. ETR1	1.485e+06	4679760	WGS
57668	Acinetobacter sp. GG2	651305	3871479	WGS
57376	Acinetobacter sp. HA	1.17306e+06	3119956	WGS
60785	Acinetobacter sp. HR7	1.5094e+06	3123428	WGS
59499	Acinetobacter sp. MDS7A	1.20936e+06	2941300	WGS
58233	Acinetobacter sp. MII	1.50781e+06	3846869	WGS
58209	Acinetobacter sp. MN12	1.51335e+06	4314475	WGS
58209	Acinetobacter sp. MN12	1.51335e+06	4314475	WGS
57626	Acinetobacter sp. NBRC 100985	1.07139e+06	3507977	WGS
57014	Acinetobacter sp. NCTC 10304	981224	4116644	WGS
43453	Acinetobacter sp. NCTC 7422	981223	3967387	WGS
57698	Acinetobacter sp. NIPH 1847	1.2177e+06	3913540	WGS
57877	Acinetobacter sp. NIPH 1859	1.2177e+06	4193112	WGS
58244	Acinetobacter sp. NIPH 1867	1.2177e+06	3933623	WGS
57877	Acinetobacter sp. NIPH 2036	1.2177e+06	3881580	WGS
59558	Acinetobacter sp. NIPH 2100	1.21771e+06	3866861	WGS
57495	Acinetobacter sp. NIPH 2168	1.21771e+06	4016126	WGS
58016	Acinetobacter sp. NIPH 2171	1.21769e+06	3480196	WGS
57696	Acinetobacter sp. NIPH 236	1.21771e+06	3534309	WGS
59556	Acinetobacter sp. NIPH 284	1.2177e+06	3163100	WGS
57689	Acinetobacter sp. NIPH 298	1.21769e+06	3460920	WGS
57698	Acinetobacter sp. NIPH 3623	1.2177e+06	3936157	WGS
57892	Acinetobacter sp. NIPH 542	1.21769e+06	4174669	WGS
59559	Acinetobacter sp. NIPH 713	1.21771e+06	3005190	WGS
57495	Acinetobacter sp. NIPH 758	1.21771e+06	4043848	WGS
59560	Acinetobacter sp. NIPH 809	1.21771e+06	4244930	WGS
57892	Acinetobacter sp. NIPH 817	520708	4084524	WGS
58016	Acinetobacter sp. NIPH 899	1.21771e+06	3767942	WGS
57668	Acinetobacter sp. NIPH 973	520709	4212220	WGS
58355	Acinetobacter sp. P8-3-8	1.02982e+06	3853174	WGS
57323	Acinetobacter sp. RUH2624	575564	3860116	WGS
57660	Acinetobacter sp. SH024	575565	3964124	WGS
58209	Acinetobacter sp. TG19627	1.2213e+06	4505931	WGS
57660	Acinetobacter sp. TG2027	1.2213e+06	3913334	WGS
57660	Acinetobacter sp. TG27347	1.22129e+06	4006240	WGS
56211	Acinetobacter sp. UNC436CL71CviS28	1.38037e+06	3226560	WGS
61570	Acinetobacter sp. Ver3	466088	3345300	WGS
56370	Acinetobacter sp. WC-743	903945	4880501	WGS
58016	Acinetobacter sp. YZS-X1-1	1.50169e+06	3278660	WGS
57660	Acinetobacter sp. ZOR0008	1.33923e+06	4127210	WGS
57495	Acinetobacter sp. neg1	1.56107e+06	3917814	WGS
58658	Acinetobacter tandoii DSM 14970 = CIP 107469	1.12093e+06	4056686	WGS
58659	Acinetobacter tjernbergiae DSM 14971 = CIP 107465	1.12093e+06	3684081	WGS
58660	Acinetobacter towneri DSM 14962 = CIP 107472	1.12093e+06	2889678	WGS
57496	Acinetobacter ursingii ANC 3649	1.25704e+06	3798198	WGS
57496	Acinetobacter ursingii DSM 16037 = CIP 107286	981336	3548662	WGS
57496	Acinetobacter ursingii NIPH 706	1.21772e+06	3490228	WGS
57626	Acinetobacter venetianus RAG-1 = CIP 110063	1.19146e+06	3456370	WGS
60611	Actibacterium mucosum KCTC 23349	1.45437e+06	3715340	WGS
60628	Actibacterium sp. 22II-S11-z10	1.46169e+06	3176380	WGS
52665	Actinoalloteichus cyanogriseus	65497.3	6026370	WGS
52665	Actinoalloteichus cyanogriseus DSM 43889	1.12093e+06	5925588	WGS
58661	Actinobacillus capsulatus DSM 19761	1.12093e+06	2616098	WGS
60988	Actinobacillus equuli subsp. equuli 19392	202948	2431533	Complete
61897	Actinobacillus minor 202	591023	2107665	WGS
61978	Actinobacillus minor NM305	637911	2396455	WGS
57270	Actinobacillus pleuropneumoniae 1022	715.13	2262828	WGS
57270	Actinobacillus pleuropneumoniae 460	715.14	2213381	WGS
57270	Actinobacillus pleuropneumoniae 518	715.18	2275540	WGS
57270	Actinobacillus pleuropneumoniae 5651	715.17	2264279	WGS
57270	Actinobacillus pleuropneumoniae 597	715.16	2219395	WGS
57270	Actinobacillus pleuropneumoniae 780	715.15	2274000	WGS
57270	Actinobacillus pleuropneumoniae S8	1.22414e+06	2253466	WGS
57270	Actinobacillus pleuropneumoniae serovar 1 str. 4074	228399	2273085	WGS
57270	Actinobacillus pleuropneumoniae serovar 1 str. 4074 (Prj:52565)	228400	2254524	WGS
57270	Actinobacillus pleuropneumoniae serovar 10 str. D13039	754259	2266276	WGS
57270	Actinobacillus pleuropneumoniae serovar 11 str. 56153	754260	2257884	WGS
57270	Actinobacillus pleuropneumoniae serovar 12 str. 1096	754261	2185499	WGS
57270	Actinobacillus pleuropneumoniae serovar 13 str. N273	754262	2236660	WGS
57270	Actinobacillus pleuropneumoniae serovar 2 str. 4226	754254	2314083	WGS
57270	Actinobacillus pleuropneumoniae serovar 2 str. S1536	871925	2206544	WGS
57270	Actinobacillus pleuropneumoniae serovar 3 str. JL03	434271	2242062	Complete
57270	Actinobacillus pleuropneumoniae serovar 4 str. M62	754255	2260565	WGS
57270	Actinobacillus pleuropneumoniae serovar 5b str. L20	416270	2274482	Complete
57270	Actinobacillus pleuropneumoniae serovar 6 str. Femo	754257	2372245	WGS
57270	Actinobacillus pleuropneumoniae serovar 6 str. Femo (Prj:51539)	754257	2302700	WGS
57270	Actinobacillus pleuropneumoniae serovar 7 str. AP76	537458	2345435	Complete
57270	Actinobacillus pleuropneumoniae serovar 9 str. CVJ13261	754258	2256417	WGS
61287	Actinobacillus succinogenes 130Z	339672	2319663	Complete
52501	Actinobacillus suis ATCC 33415	743972	2501600	Complete
52501	Actinobacillus suis H91-0380	696748	2484940	Complete
62439	Actinobacillus ureae ATCC 25976	887324	2347018	WGS
62417	Actinobaculum massiliae ACS-171-V-Col2	883066	2020144	WGS
44752	Actinobaculum schaalii	59505.5	2159310	Complete
44752	Actinobaculum schaalii DSM 15541	1.12093e+06	2119427	WGS
62418	Actinobaculum schaalii FB123-CNA-2	883067	2060300	WGS
59615	Actinobaculum sp. oral taxon 183 str. F0552	1.22726e+06	2343959	WGS
58662	Actinobaculum urinale DSM 15805	1.12093e+06	1918612	WGS
61397	Actinocatenispora sera	390989	6947240	WGS
58663	Actinokineospora enzanensis DSM 44649	1.12093e+06	8112376	WGS
58664	Actinokineospora inagensis DSM 44258	1.12094e+06	7273164	WGS
62492	Actinokineospora sp. EG49	909614	7510345	WGS
58665	Actinomadura atramentaria DSM 43919	1.12094e+06	6709087	WGS
61811	Actinomadura flavalba DSM 45200	561175	6160550	WGS
60348	Actinomadura madurae LIID-AJ290	1.39418e+06	9916444	WGS
60368	Actinomadura oligospora ATCC 43269	1.3998e+06	9351133	WGS
58666	Actinomadura rifamycini DSM 43936	1.12094e+06	8366710	WGS
62444	Actinomyces cardiffensis F0333	888050	2178485	WGS
61704	Actinomyces coleocanis DSM 15436	525245	1716668	WGS
58667	Actinomyces dentalis DSM 19115	1.12094e+06	3524754	WGS
62419	Actinomyces europaeus ACS-120-V-Col10b	883069	1905561	WGS
55085	Actinomyces georgiae DSM 6843	1.12094e+06	2484807	WGS
55085	Actinomyces georgiae F0490	1.12572e+06	2421328	WGS
58668	Actinomyces gerencseriae DSM 6844	1.12094e+06	3413955	WGS
58300	Actinomyces graevenitzii C83	435830	2192736	WGS
58300	Actinomyces graevenitzii F0530	1.32182e+06	2065477	WGS
58669	Actinomyces israelii DSM 43320	1.12094e+06	4025770	WGS
57359	Actinomyces johnsonii F0510	1.22726e+06	3294858	WGS
56461	Actinomyces massiliensis 4401292	1.16763e+06	3336993	WGS
56461	Actinomyces massiliensis F0489	1.12572e+06	3389647	WGS
58629	Actinomyces naeslundii str. Howell 279	1.1158e+06	3091268	WGS
62451	Actinomyces neuii BVS029A5	888439	2136781	WGS
58670	Actinomyces neuii subsp. neuii DSM 8576	1.12095e+06	2265009	WGS
57475	Actinomyces odontolyticus ATCC 17982	411467	2393958	WGS
57475	Actinomyces odontolyticus F0309	649742	2430527	WGS
59880	Actinomyces slackii ATCC 49928	1.2783e+06	3150683	WGS
59450	Actinomyces sp. HPA0247	1.20356e+06	2422782	WGS
58589	Actinomyces sp. ICM39	1.10503e+06	2251603	WGS
62581	Actinomyces sp. ICM47	936548	2435151	WGS
62582	Actinomyces sp. ICM54	936549	2347616	WGS
60114	Actinomyces sp. MS2	1.32593e+06	2878449	WGS
59588	Actinomyces sp. S4-C9	1.21958e+06	1955632	WGS
59944	Actinomyces sp. S6-Spd3	1.28468e+06	2091011	WGS
62277	Actinomyces sp. oral taxon 170 str. F0386	762963	3112472	WGS
57735	Actinomyces sp. oral taxon 172 str. F0311	1.32178e+06	2417041	WGS
57672	Actinomyces sp. oral taxon 175 str. F0384	944560	3133330	WGS
56280	Actinomyces sp. oral taxon 178 str. F0338	888051	2800706	WGS
62445	Actinomyces sp. oral taxon 180 str. F0310	888052	2366415	WGS
59161	Actinomyces sp. oral taxon 181 str. F0379	1.12769e+06	1899740	WGS
62446	Actinomyces sp. oral taxon 448 str. F0400	888056	2790736	WGS
62027	Actinomyces sp. oral taxon 848 str. F0332	649743	2519868	WGS
57359	Actinomyces sp. oral taxon 849 str. F0330	653386	3303818	WGS
56280	Actinomyces sp. oral taxon 877 str. F0543	1.22726e+06	2674871	WGS
58647	Actinomyces sp. ph3	1.11806e+06	1859443	WGS
58671	Actinomyces suimastitidis DSM 15538	1.12095e+06	2292363	WGS
61695	Actinomyces timonensis DSM 23838	521393	2906169	WGS
62420	Actinomyces turicensis ACS-279-V-Col4	883077	1948685	WGS
53864	Actinomyces urogenitalis DSM 15434	525246	2677676	WGS
53864	Actinomyces urogenitalis S6-C4	1.28468e+06	2713444	WGS
58672	Actinomyces vaccimaxillae DSM 15804	1.12095e+06	2338426	WGS
57672	Actinomyces viscosus C505	562973	3115155	WGS
58673	Actinomycetospora chiangmaiensis DSM 45062	1.12095e+06	5856942	WGS
59778	Actinoplanes friuliensis DSM 7358	1.247e+06	9376071	Complete
58674	Actinoplanes globisporus DSM 43857	1.12095e+06	10983132	WGS
61677	Actinoplanes missouriensis 431	512565	8773466	Complete
62030	Actinoplanes sp. N902-109	649831	9228054	Complete
60193	Actinoplanes sp. SE50/110	134676	9239851	Complete
61745	Actinoplanes subtropicus	543632	11257300	WGS
60959	Actinoplanes utahensis NRRL 12052	1869.4	9489843	WGS
58675	Actinopolymorpha alba DSM 45243	1.12095e+06	7973168	WGS
61488	Actinopolyspora erythraea YIM90600	414996	5353876	WGS
58532	Actinopolyspora halophila DSM 43834	1.08955e+06	5353291	WGS
58450	Actinopolyspora mortivallis DSM 44261	1.0502e+06	4231650	WGS
58249	Actinospica acidiphila	304899	7309270	WGS
61611	Actinospica robiniae DSM 44927	479430	9918687	WGS
60634	Actinosporangium sp. NRRL B-3428	1.46382e+06	8567420	WGS
61537	Actinosynnema mirum DSM 43827	446463	8248144	Complete
62353	Actinotalea fermentans ATCC 43279 = JCM 9966 = DSM 3133	862422	3617740	WGS
62621	Actinotalea ferrariae CF5-4	948458	3987080	WGS
62514	Adhaeribacter aquaticus DSM 16391	926549	5166891	WGS
60310	Adlercreutzia equolifaciens DSM 19450	1.38448e+06	2862526	Complete
60498	Advenella kashmirensis W13003	1.42433e+06	4845990	WGS
58390	Advenella kashmirensis WT001	1.03667e+06	4408989	WGS
59780	Advenella mimigardefordensis DPN7	1.24773e+06	4764126	Complete
58676	Aequorivita capsosiphonis DSM 23843	1.12095e+06	4032845	WGS
62234	Aequorivita sublithincola DSM 14238	746697	3520671	Complete
62371	Aerococcus urinae ACS-120-V-Col10a	866775	2080974	Complete
58017	Aerococcus urinaeequi DSM 20341	1.12095e+06	1985085	WGS
62040	Aerococcus viridans ATCC 11563	655812	1980335	WGS
58017	Aerococcus viridans LL1	1.17563e+06	1985086	WGS
58097	Aeromonas allosaccharophila BVH88	656.4	4708594	WGS
58097	Aeromonas allosaccharophila CECT 4199	656.3	4663841	WGS
57540	Aeromonas aquariorum AAK1	1.1568e+06	4748568	WGS
58621	Aeromonas australiensis CECT 8023	1.11488e+06	4110035	WGS
58177	Aeromonas bestiarum CECT 4227	105751	4690820	WGS
61515	Aeromonas bivalvium CECT 7113	440079	4302589	WGS
57221	Aeromonas caviae Ae398	878320	4419799	WGS
57221	Aeromonas caviae CECT 4221	648.22	4579196	WGS
57221	Aeromonas caviae CECT 838	648.21	4471402	WGS
57221	Aeromonas caviae L12	648.23	4376717	WGS
57540	Aeromonas dhakensis	196024	4877870	WGS
43116	Aeromonas diversa 2478-85	1.26824e+06	4022111	WGS
43116	Aeromonas diversa CECT 4254	502790	4062507	WGS
62202	Aeromonas encheleia CECT 4342	73010.3	4472527	WGS
62023	Aeromonas eucrenophila CECT 4224	649.3	4540059	WGS
61900	Aeromonas fluvialis LMG 24681	591962	3904228	WGS
57540	Aeromonas hydrophila 113	1.26808e+06	4669048	WGS
57540	Aeromonas hydrophila 14	1.26807e+06	4663361	WGS
57540	Aeromonas hydrophila 145	1.27314e+06	4846656	WGS
57540	Aeromonas hydrophila 173	1.26808e+06	4777705	WGS
57540	Aeromonas hydrophila 187	1.26808e+06	4775666	WGS
57782	Aeromonas hydrophila 226	1.26808e+06	5097345	WGS
57540	Aeromonas hydrophila 259	1.26808e+06	4690803	WGS
57540	Aeromonas hydrophila 277	1.26808e+06	4781713	WGS
60229	Aeromonas hydrophila 4AK4	1.3543e+06	4527993	Complete
57782	Aeromonas hydrophila AD9	1.4535e+06	4907070	WGS
57782	Aeromonas hydrophila AL09-71	1.41811e+06	5023860	Complete
57221	Aeromonas hydrophila HZM	1.45401e+06	4451360	WGS
57782	Aeromonas hydrophila J-1	1.41958e+06	5000814	Complete
57540	Aeromonas hydrophila L14f	644.28	4682779	WGS
57782	Aeromonas hydrophila M013	644.25	4967716	WGS
57782	Aeromonas hydrophila M023	644.26	4914534	WGS
57782	Aeromonas hydrophila M062	644.27	4974350	WGS
57782	Aeromonas hydrophila ML09-119	1.28839e+06	5024500	Complete
57782	Aeromonas hydrophila SNUFPC-A8	1.23267e+06	4962330	WGS
57540	Aeromonas hydrophila SSU	1.07338e+06	4914725	WGS
57540	Aeromonas hydrophila YL17	1.44814e+06	4806270	Complete
57782	Aeromonas hydrophila pc104A	1.41811e+06	5023830	Complete
57782	Aeromonas hydrophila subsp. hydrophila ATCC 7966	380704	4744448	Complete
57782	Aeromonas hydrophila subsp. ranae CIP 107985	208958	4682559	WGS
58278	Aeromonas jandaei CECT 4228	650.3	4500350	WGS
57540	Aeromonas jandaei L14h	650.4	4676941	WGS
58278	Aeromonas jandaei Riv2	1.45828e+06	4478090	WGS
57598	Aeromonas media	651.3	4620100	WGS
57598	Aeromonas media	651.4	4612360	WGS
57598	Aeromonas media WS	1.2081e+06	4297664	WGS
59859	Aeromonas molluscorum 848	1.26824e+06	4224725	WGS
58177	Aeromonas piscicola LMG 24783	600645	5177970	WGS
62169	Aeromonas popoffii CIP 105493	70856.3	4762473	WGS
62020	Aeromonas rivuli DSM 22539	648794	4534147	WGS
58177	Aeromonas salmonicida CBA100	645.8	4788109	WGS
57597	Aeromonas salmonicida subsp. achromogenes AS03	1.2331e+06	4419354	WGS
57597	Aeromonas salmonicida subsp. masoucida NBRC 13784	1.21698e+06	4502260	WGS
57597	Aeromonas salmonicida subsp. pectinolytica 34mel	1.32496e+06	4726050	WGS
57597	Aeromonas salmonicida subsp. salmonicida 01-B526	1.07614e+06	4762734	WGS
57597	Aeromonas salmonicida subsp. salmonicida 2004-05MF26	29491.1	5021090	WGS
57597	Aeromonas salmonicida subsp. salmonicida 2009-144K3	29491.1	4958831	WGS
57597	Aeromonas salmonicida subsp. salmonicida A449	382245	5040536	Complete
57597	Aeromonas salmonicida subsp. salmonicida CIP 103209	29491.1	4740147	WGS
61962	Aeromonas sanarellii LMG 24682	633415	4186903	WGS
62036	Aeromonas schubertii CECT 4240	652.4	4126255	WGS
61016	Aeromonas simiae CIP 107798	218936	3987694	WGS
62017	Aeromonas sobria CECT 4245	646.4	4683669	WGS
58155	Aeromonas sp. 159	1.21696e+06	3348018	WGS
60856	Aeromonas sp. 4287D	1.54338e+06	4717507	WGS
58278	Aeromonas sp. AE122	558884	4394373	WGS
61806	Aeromonas sp. AE235	558964	4582304	WGS
57540	Aeromonas sp. MDS8	1.28289e+06	4814454	WGS
58155	Aeromonas sp. ZOR0001	1.33923e+06	4457373	WGS
57221	Aeromonas sp. ZOR0002	1.33923e+06	4578066	WGS
61963	Aeromonas taiwanensis	633417	4230590	WGS
61253	Aeromonas tecta CECT 7082	324617	4755221	WGS
58155	Aeromonas veronii	654.12	4542660	WGS
58155	Aeromonas veronii AER39	1.07338e+06	4378105	WGS
58155	Aeromonas veronii AER397	1.07338e+06	4446917	WGS
58488	Aeromonas veronii AMC34	1.07338e+06	4542842	WGS
58155	Aeromonas veronii AMC35	1.07339e+06	4540320	WGS
58155	Aeromonas veronii B565	998088	4551783	Complete
58155	Aeromonas veronii Hm21	1.34742e+06	4680568	WGS
58155	Aeromonas veronii bv. sobria LMG 13067	114517	4735607	WGS
58155	Aeromonas veronii bv. veronii CECT 4257	197701	4516420	WGS
58677	Aestuariibacter salexigens DSM 15300	1.12095e+06	3780318	WGS
58678	Aestuariimicrobium kwangyangense DSM 21549	1.12095e+06	2986926	WGS
58679	Afifella pfennigii DSM 17143	1.12096e+06	3872590	WGS
59428	Afipia birgiae 34632	1.19791e+06	5242665	WGS
57107	Afipia broomeae ATCC 49717	883078	5259998	WGS
58015	Afipia clevelandensis ATCC 49720	883079	4393938	WGS
62421	Afipia felis ATCC 53690	883080	4195318	WGS
62071	Afipia sp. 1NLS2	666684	3970987	WGS
57107	Afipia sp. NBIMC_P1-C1	1.32055e+06	5129237	WGS
57107	Afipia sp. NBIMC_P1-C2	1.32055e+06	4995746	WGS
57107	Afipia sp. NBIMC_P1-C3	1.32055e+06	4992835	WGS
42814	Afipia sp. OHSU_I-C4	1.29786e+06	5077728	WGS
42814	Afipia sp. OHSU_I-C6	1.29786e+06	5089373	WGS
42814	Afipia sp. OHSU_I-uncloned	1.29786e+06	5082619	WGS
42814	Afipia sp. OHSU_II-C1	1.29786e+06	5084028	WGS
42814	Afipia sp. OHSU_II-C2	1.29786e+06	5078877	WGS
42814	Afipia sp. OHSU_II-uncloned	1.29305e+06	5077273	WGS
60503	Afipia sp. P52-10	1.42992e+06	5085524	WGS
60122	Agarivorans albus MKT 106	1.33101e+06	4717353	WGS
57720	Aggregatibacter actinomycetemcomitans ANH9381	754507	2136808	Complete
57720	Aggregatibacter actinomycetemcomitans D17P-2	754506	2155056	WGS
57720	Aggregatibacter actinomycetemcomitans D17P-3	754505	2335452	WGS
57720	Aggregatibacter actinomycetemcomitans D7S-1	694569	2309828	WGS
57720	Aggregatibacter actinomycetemcomitans DSM 8324	1.12096e+06	2080861	WGS
57720	Aggregatibacter actinomycetemcomitans HK1651	272556	2105500	Complete
57999	Aggregatibacter actinomycetemcomitans RhAA1	1.08945e+06	2233070	WGS
57720	Aggregatibacter actinomycetemcomitans Y4	1.03519e+06	2162869	WGS
57720	Aggregatibacter actinomycetemcomitans serotype a str. A160	1.16701e+06	1827865	WGS
57720	Aggregatibacter actinomycetemcomitans serotype a str. H5P1	907486	2111904	WGS
57720	Aggregatibacter actinomycetemcomitans serotype b str. I23C	907492	1988514	WGS
57720	Aggregatibacter actinomycetemcomitans serotype b str. S23A	1.16701e+06	1920729	WGS
57720	Aggregatibacter actinomycetemcomitans serotype b str. SCC1398	907491	2031158	WGS
57720	Aggregatibacter actinomycetemcomitans serotype b str. SCC4092	1.16701e+06	1967506	WGS
57720	Aggregatibacter actinomycetemcomitans serotype c str. AAS4A	1.16701e+06	2024716	WGS
57720	Aggregatibacter actinomycetemcomitans serotype c str. SCC2302	907493	2034528	WGS
57720	Aggregatibacter actinomycetemcomitans serotype d str. I63B	907487	2154924	WGS
57999	Aggregatibacter actinomycetemcomitans serotype e str. SC1083	907488	2129599	WGS
57720	Aggregatibacter actinomycetemcomitans serotype e str. SCC393	907489	2204726	WGS
57720	Aggregatibacter actinomycetemcomitans serotype f str. D18P1	907490	2222558	WGS
58143	Aggregatibacter aphrophilus ATCC 33389	985008	2256104	WGS
58143	Aggregatibacter aphrophilus F0387	679198	2245851	WGS
58143	Aggregatibacter aphrophilus NJ8700	634176	2313035	Complete
62447	Aggregatibacter segnis ATCC 33393	888057	2005759	WGS
60097	Aggregatibacter sp. oral taxon 458 str. W10330	1.32177e+06	1987835	WGS
59273	Agrobacterium albertimagni AOL15	1.15694e+06	5066801	WGS
57555	Agrobacterium fabrum str. C58	176299	5674258	Complete
57109	Agrobacterium radiobacter K84	311404	7228880	Complete
57109	Agrobacterium rhizogenes CF262	359.11	6662905	WGS
57109	Agrobacterium rhizogenes CF263	359.12	6667127	WGS
61328	Agrobacterium rhizogenes OV677	359.13	6544331	WGS
56379	Agrobacterium sp. 10MFCol1.1	1.15078e+06	5434188	WGS
43897	Agrobacterium sp. 224MFTsu3.1	1.16764e+06	4793766	WGS
56572	Agrobacterium sp. 33MFTa1.1	1.27903e+06	5304660	WGS
57555	Agrobacterium sp. ATCC 31749	82789.3	5449517	WGS
56379	Agrobacterium sp. H13-3	861208	3425481	Complete
43897	Agrobacterium sp. UNC420CL41Cvi	1.34044e+06	4966110	WGS
58522	Agrobacterium tumefaciens CCNWGS0286	1.08293e+06	5212983	WGS
58451	Agrobacterium tumefaciens F2	1.05072e+06	5465705	WGS
58230	Agrobacterium tumefaciens GW4	1.31527e+06	5636660	WGS
56379	Agrobacterium tumefaciens LBA4213 (Ach5)	1.43506e+06	5630690	Complete
61326	Agrobacterium tumefaciens MEJ076	358.5	5122354	WGS
58230	Agrobacterium tumefaciens str. Cherry 2E-2-2	1.28178e+06	5413622	WGS
61176	Agrobacterium vitis S4	311403	6320946	Complete
58680	Agromyces italicus DSM 16388	1.12096e+06	3730505	WGS
58681	Agromyces subbeticus DSM 16689	1.12096e+06	4303916	WGS
60277	Ahrensia sp. 13_GOM-1096m	1.38038e+06	3405960	WGS
62225	Ahrensia sp. R2A130	744979	3717030	WGS
55290	Akkermansia muciniphila	239935	2557610	WGS
55290	Akkermansia muciniphila ATCC BAA-835	349742	2664102	Complete
58122	Alcaligenes faecalis MOR02	511.6	4402705	WGS
59573	Alcaligenes faecalis subsp. faecalis NBRC 13111	1.2181e+06	4033690	WGS
59271	Alcaligenes faecalis subsp. faecalis NCIB 8687	1.15692e+06	3874008	WGS
58122	Alcaligenes faecalis subsp. phenolicus DSM 16503	1.12096e+06	4241515	WGS
60356	Alcaligenes sp. DH1f	1.39728e+06	7138950	WGS
58122	Alcaligenes sp. HPC1271	1.06963e+06	4264949	WGS
54471	Alcanivorax borkumensis SK2	393595	3120143	Complete
62545	Alcanivorax dieselolei B5	930169	4928223	Complete
59364	Alcanivorax hongdengensis A-11-3	1.17718e+06	3641131	WGS
59365	Alcanivorax jadensis T9	1.17718e+06	3629371	WGS
61421	Alcanivorax pacificus W11-5	391936	4134517	WGS
59363	Alcanivorax sp. 19-m-6	1.17715e+06	4132804	WGS
53403	Alcanivorax sp. 43B_GOM-46m	1.38039e+06	4737582	WGS
54471	Alcanivorax sp. 97CO-5	1.43597e+06	3239115	WGS
61044	Alcanivorax sp. DG881	236097	3801850	WGS
60360	Alcanivorax sp. P2S70	1.39753e+06	3629491	WGS
53403	Alcanivorax sp. PN-3	1.39753e+06	4681791	WGS
54369	Algibacter lectus JCM 19274	221126	4815979	WGS
54369	Algibacter lectus JCM 19300	221126	4692319	WGS
58682	Algicola sagamiensis DSM 14643	1.12096e+06	4336382	WGS
60478	Algiphilus aromaticivorans DG1253	1.41578e+06	3805680	WGS
58683	Algoriphagus mannitolivorans DSM 15301	1.12097e+06	4148911	WGS
58684	Algoriphagus marincola DSM 16067	1.12097e+06	4415968	WGS
60055	Algoriphagus marincola HL-49	1.30574e+06	4182541	WGS
61393	Algoriphagus sp. PR1	388414	4776234	WGS
58685	Algoriphagus terrigena DSM 22685	1.12097e+06	5774291	WGS
58686	Algoriphagus vanfongensis DSM 17529	1.12097e+06	4707695	WGS
58687	Aliagarivorans marinus DSM 23064	1.12097e+06	4871017	WGS
58688	Aliagarivorans taiwanensis DSM 22990	1.12097e+06	4403125	WGS
54532	Alicycliphilus denitrificans BC	596153	4835713	Complete
54532	Alicycliphilus denitrificans K601	596154	5070751	Complete
59436	Alicycliphilus sp. CRZ1	1.20079e+06	2882099	WGS
61744	Alicyclobacillus acidocaldarius LAA1	543302	2940829	WGS
61694	Alicyclobacillus acidocaldarius subsp. acidocaldarius DSM 446	521098	3205686	Complete
58444	Alicyclobacillus acidocaldarius subsp. acidocaldarius Tc-4-1	1.04883e+06	3124048	Complete
60236	Alicyclobacillus acidoterrestris ATCC 49025	1.35685e+06	4043503	WGS
58689	Alicyclobacillus contaminans DSM 17975	1.12097e+06	3265629	WGS
58690	Alicyclobacillus herbarius DSM 13609	1.12097e+06	3308484	WGS
59432	Alicyclobacillus hesperidum URH17-3-68	1.20035e+06	2955980	WGS
60296	Alicyclobacillus macrosporangiidus CPP55	1.3823e+06	4091650	WGS
58691	Alicyclobacillus pohliae DSM 22757	1.12097e+06	3355882	WGS
58603	Alicyclobacillus pomorum DSM 14955	1.11148e+06	3397229	WGS
60291	Aliihoeflea sp. 2WW	1.38112e+06	4136534	WGS
58199	Aliivibrio fischeri ZF-211	617135	4015457	WGS
56849	Aliivibrio logei 5S-186	626086	4436165	WGS
56849	Aliivibrio salmonicida LFI1238	316275	4655660	Complete
59424	Alishewanella aestuarii B11	1.19717e+06	3581516	WGS
59418	Alishewanella agri BL06	1.19525e+06	3484800	WGS
59169	Alishewanella jeotgali KCTC 22429	1.12937e+06	3822474	WGS
56071	Alistipes finegoldii DSM 17242	679935	3734239	Complete
62207	Alistipes indistinctus YIT 12060	742725	2848557	WGS
55464	Alistipes onderdonkii DSM 19147	1.12097e+06	3861988	WGS
61533	Alistipes putredinis DSM 17216	445970	2547410	WGS
58364	Alistipes senegalensis JC50	1.03373e+06	3980436	WGS
62199	Alistipes shahii WAL 8301	717959	3763317	Complete
60764	Alistipes sp. 627	1.50139e+06	2304821	WGS
55464	Alistipes sp. AL-1	1.49968e+06	3611090	WGS
59510	Alistipes sp. AP11	1.21181e+06	2753292	WGS
56071	Alistipes sp. HGB5	908612	3453555	WGS
58363	Alistipes sp. JC136	1.03373e+06	3480400	WGS
60166	Alistipes sp. ZOR0009	1.33925e+06	4445493	WGS
59413	Alkalibacillus haloalkaliphilus C5	1.19312e+06	2883372	WGS
59634	Alkalibacterium sp. AK22	1.22952e+06	2317910	WGS
62529	Alkaliflexus imshenetskii DSM 15055	927658	4116505	WGS
60960	Alkalilimnicola ehrlichii MLHE-1	187272	3275944	Complete
61146	Alkaliphilus metalliredigens QYMF	293827	4929566	Complete
61310	Alkaliphilus oremlandii OhILAs	350688	3123558	Complete
60415	Alkaliphilus transvaalensis ATCC 700919	1.40842e+06	4024840	WGS
58692	Alkanindiges illinoisensis DSM 15370	1.12098e+06	3299410	WGS
58449	Allobaculum stercoricanis DSM 13633	1.0502e+06	2052677	WGS
61838	Allochromatium vinosum DSM 180	572477	3669074	Complete
58693	Allofustis seminis DSM 15817	1.12098e+06	1434661	WGS
62422	Alloiococcus otitis ATCC 51267	883081	1776951	WGS
61005	Allokutzneria albata	211114	8516830	WGS
62101	Alloprevotella rava F0323	679199	2579119	WGS
54782	Alloscardovia omnicolens DSM 21503	1.12098e+06	1843701	WGS
54782	Alloscardovia omnicolens F0580	1.32182e+06	1779949	WGS
56774	Alteromonadales bacterium TW-7	156578	4098856	WGS
61892	Alteromonas australica	589873	4308830	Complete
57644	Alteromonas macleodii AD006	28108.2	4623014	WGS
57644	Alteromonas macleodii AD037	28108.2	4617902	WGS
57135	Alteromonas macleodii AltDE1	1.00479e+06	4947126	Complete
57135	Alteromonas macleodii str. 'Aegean Sea MED64'	1.30025e+06	4397537	Complete
57644	Alteromonas macleodii str. 'Balearic Sea AD45'	1.00479e+06	4674885	Complete
58315	Alteromonas macleodii str. 'Black Sea 11'	1.00479e+06	4480507	Complete
57135	Alteromonas macleodii str. 'Deep ecotype'	314276	4412282	Complete
57135	Alteromonas macleodii str. 'English Channel 615'	1.30025e+06	4582352	Complete
57644	Alteromonas macleodii str. 'English Channel 673'	1.00479e+06	4601785	Complete
57135	Alteromonas macleodii str. 'Ionian Sea U4'	1.30026e+06	4624578	Complete
57135	Alteromonas macleodii str. 'Ionian Sea U7'	1.30026e+06	4442936	Complete
57135	Alteromonas macleodii str. 'Ionian Sea U8'	1.30026e+06	4395035	Complete
57135	Alteromonas macleodii str. 'Ionian Sea UM4b'	1.30026e+06	4438767	Complete
57135	Alteromonas macleodii str. 'Ionian Sea UM7'	1.30026e+06	4931660	Complete
60992	Alteromonas marina AD001	203795	4314556	WGS
60016	Alteromonas sp. ALT199	1.29887e+06	4635666	WGS
35036	Alteromonas sp. LOR	1.53799e+06	4409820	WGS
35036	Alteromonas sp. LTR	1.5381e+06	4410310	WGS
58422	Alteromonas sp. S89	1.04238e+06	3853756	WGS
62189	Alteromonas sp. SN2	715451	4972148	Complete
59599	Altuibacter lentus	1.22341e+06	3160030	WGS
58694	Alysiella crassa DSM 2578	1.12098e+06	2762030	WGS
60043	Aminiphilus circumscriptus DSM 16581	1.30487e+06	3218764	WGS
62562	Aminobacter sp. J41	935261	4224210	WGS
61842	Aminobacterium colombiense DSM 12261	572547	1980592	Complete
60044	Aminobacterium mobile DSM 12262	1.30488e+06	2104279	WGS
61873	Aminomonas paucivorans DSM 12260	584708	2630170	WGS
61502	Ammonifex degensii KC4	429009	2157067	Complete
58695	Amorphus coralli DSM 19760	1.12098e+06	4309961	WGS
61814	Amphibacillus jilinensis Y1	562743	3821912	WGS
62154	Amphibacillus xylanus NBRC 15112	698758	2569486	Complete
59886	Amphritea japonica ATCC BAA-1530	1.27831e+06	3789611	WGS
59153	Amycolatopsis alba DSM 44262	1.12597e+06	9811174	WGS
59733	Amycolatopsis azurea DSM 43854	1.23818e+06	9205957	WGS
58531	Amycolatopsis balhimycina FH 1894	1.08955e+06	10851479	WGS
58530	Amycolatopsis benzoatilytica AK 16/65	1.08954e+06	8696793	WGS
59941	Amycolatopsis decaplanina DSM 44594	1.28424e+06	8503703	WGS
61910	Amycolatopsis halophila YIM 93223	592678	5550897	WGS
57965	Amycolatopsis japonica	208439	9053860	Complete
61266	Amycolatopsis jejuensis	330084	10103600	WGS
60625	Amycolatopsis lurida NRRL 2430	1.46037e+06	8987660	WGS
47955	Amycolatopsis mediterranei RB	1.22152e+06	10246864	Complete
47955	Amycolatopsis mediterranei S699	713604	10236779	Complete
47955	Amycolatopsis mediterranei U32	749928	10236715	Complete
57694	Amycolatopsis methanolica 239	1.06898e+06	7196860	WGS
58473	Amycolatopsis nigrescens CSC17Ta-90	1.06898e+06	9111009	WGS
59152	Amycolatopsis orientalis DSM 40040 = KCTC 9412	1.12597e+06	9044548	WGS
60158	Amycolatopsis orientalis DSM 43388	1.33796e+06	8899929	WGS
57016	Amycolatopsis orientalis DSM 46075	1.33796e+06	9421992	WGS
57965	Amycolatopsis orientalis HCCB10007	1.15691e+06	8948591	Complete
61125	Amycolatopsis rifamycinica	287986	9202420	WGS
57694	Amycolatopsis sp. ATCC 39116	385957	8441618	WGS
57965	Amycolatopsis sp. MJM2582	1.42775e+06	8932980	WGS
58696	Amycolatopsis taiwanensis DSM 45107	1.12098e+06	8751652	WGS
57694	Amycolatopsis thermoflava N1165	1.06898e+06	8692968	WGS
60999	Amycolatopsis vancoresmycina	208444	9837650	WGS
61527	Amycolicicoccus subflavus DQS3-9A1	443218	4863490	Complete
61092	Anabaena cylindrica PCC 7122	272123	7063285	Complete
61563	Anabaena sp. 90	46234.3	5305675	Complete
60930	Anabaena sp. PCC 7108	163908	5885741	WGS
61051	Anabaena variabilis ATCC 29413	240293	7105752	Complete
56214	Anaeroarcus burkinensis DSM 6283	1.12099e+06	3337838	WGS
61903	Anaerobaculum hydrogeniformans ATCC BAA-1850	592016	2314408	WGS
62475	Anaerobaculum mobile DSM 13181	891968	2160700	Complete
58697	Anaerobiospirillum succiniciproducens DSM 6400	1.12099e+06	3772048	WGS
58044	Anaerococcus hydrogenalis ACS-025-V-Sch4	879306	1971840	WGS
58044	Anaerococcus hydrogenalis DSM 7454	561177	1882247	WGS
57374	Anaerococcus lactolyticus ATCC 51172	525254	2150250	WGS
57374	Anaerococcus lactolyticus S7-1-13	1.28469e+06	1936866	WGS
58051	Anaerococcus obesiensis ph10	1.11806e+06	2012789	WGS
62402	Anaerococcus prevotii ACS-065-V-Col13	879305	1689723	WGS
61724	Anaerococcus prevotii DSM 20548	525920	1998633	Complete
58365	Anaerococcus senegalensis JC48	1.03373e+06	1770864	WGS
62593	Anaerococcus sp. 9402080	938293	2209567	WGS
45941	Anaerococcus sp. 9403502	938294	2302207	WGS
58645	Anaerococcus sp. PH9	1.11806e+06	1988316	WGS
61705	Anaerococcus tetradius ATCC 35098	525255	2120469	WGS
58051	Anaerococcus vaginalis ATCC 51170	655811	1888011	WGS
61534	Anaerofustis stercorihominis DSM 17244	445972	2284703	WGS
62348	Anaeroglobus geminatus F0357	861450	1782867	WGS
62525	Anaerolinea thermophila UNI-1	926569	3532378	Complete
56214	Anaeromusa acidaminophila DSM 3853	1.12099e+06	3470054	WGS
57037	Anaeromyxobacter dehalogenans 2CP-1	455488	5029329	Complete
61133	Anaeromyxobacter dehalogenans 2CP-C	290397	5013479	Complete
61464	Anaeromyxobacter sp. Fw109-5	404589	5277990	Complete
57037	Anaeromyxobacter sp. K	447218	5061632	Complete
61385	Anaerophaga sp. HS1	385682	3858090	WGS
62435	Anaerophaga thermohalophila DSM 12881	886379	4307020	WGS
59207	Anaerophaga thermohalophila str. Valhall	1.14427e+06	4528463	WGS
60200	Anaerosalibacter sp. ND1	1.34739e+06	3196600	WGS
55430	Anaerostipes caccae DSM 14662	411491	3598789	WGS
55206	Anaerostipes hadrus DSM 3319	649757	2765206	WGS
55430	Anaerostipes sp. 3_2_56FAA	665937	3286322	WGS
52957	Anaerotruncus colihominis DSM 17241	445973	3714950	WGS
59696	Anaerotruncus sp. G3(2012)	1.23584e+06	3504538	WGS
62322	Anaerovibrio lipolyticus 5S	82374.4	2828534	WGS
60416	Anaerovibrio lipolyticus LB2005	1.40842e+06	2682730	WGS
59434	Anaerovibrio sp. RM50	1.20056e+06	2780750	WGS
58698	Anaerovorax odorimutans DSM 5092	1.121e+06	3258209	WGS
61850	Anaplasma centrale str. Israel	574556	1206806	Complete
55765	Anaplasma marginale str. Dawn	1.41284e+06	1196760	Complete
55765	Anaplasma marginale str. Florida	320483	1202435	Complete
55765	Anaplasma marginale str. Florida (Prj:64631)	320484	1112613	WGS
55765	Anaplasma marginale str. Florida Relapse	1.00094e+06	1149741	WGS
55765	Anaplasma marginale str. Gypsy Plains	1.41284e+06	1198622	Complete
55765	Anaplasma marginale str. Mississippi	517436	1140120	WGS
55765	Anaplasma marginale str. Okeechobee	1.00094e+06	1206776	WGS
55765	Anaplasma marginale str. Oklahoma	1.00094e+06	1151365	WGS
55765	Anaplasma marginale str. Puerto Rico	517437	1156821	WGS
55765	Anaplasma marginale str. South Idaho	1.00094e+06	1242515	WGS
55765	Anaplasma marginale str. St. Maries	234827	1197687	Complete
55765	Anaplasma marginale str. St. Maries (Prj:64635)	234826	1149732	WGS
55765	Anaplasma marginale str. Virginia	403779	1148465	WGS
55765	Anaplasma marginale str. Washington Okanogan	1.00094e+06	1230844	WGS
56954	Anaplasma phagocytophilum CRT38	1.26928e+06	1506545	WGS
56954	Anaplasma phagocytophilum Dog2	1.18425e+06	1473302	Complete
56954	Anaplasma phagocytophilum HGE1	1.21711e+06	1469600	WGS
56954	Anaplasma phagocytophilum HZ	212043	1471282	Complete
56954	Anaplasma phagocytophilum HZ2	1.18425e+06	1477581	Complete
56954	Anaplasma phagocytophilum JM	1.17306e+06	1481598	Complete
56954	Anaplasma phagocytophilum str. CRT35	1.39251e+06	1447020	WGS
56954	Anaplasma phagocytophilum str. MRK	1.39251e+06	1479230	WGS
56954	Anaplasma phagocytophilum str. Norway variant2	1.39251e+06	1515940	WGS
48793	Ancylobacter sp. FA202	1.11111e+06	5351904	WGS
58445	Anditalea andensis	1.04898e+06	5429410	WGS
58699	Andreprevotia chitinilytica DSM 18519	1.121e+06	5149010	WGS
62028	Aneurinibacillus aneurinilyticus ATCC 12856	649747	5275108	WGS
58700	Aneurinibacillus terranovensis DSM 18919	1.121e+06	4238121	WGS
57275	Anoxybacillus ayderensis AB04	265546	2832347	WGS
57275	Anoxybacillus flavithermus	33934.3	2838680	WGS
60000	Anoxybacillus flavithermus AK1	1.29758e+06	2628402	WGS
60085	Anoxybacillus flavithermus NBRC 109594	1.31597e+06	2749583	WGS
59853	Anoxybacillus flavithermus TNO-09.006	1.26758e+06	2651725	WGS
61640	Anoxybacillus flavithermus WK1	491916	2846746	Complete
60288	Anoxybacillus flavithermus subsp. yunnanensis str. E13	1.38041e+06	2838390	WGS
55142	Anoxybacillus gonensis G2	198467	2758325	WGS
55142	Anoxybacillus kamchatkensis G10	1.21255e+06	2846555	WGS
57275	Anoxybacillus sp. BCO1	1.54875e+06	2808701	WGS
55142	Anoxybacillus sp. DT3-1	690871	2586621	WGS
60829	Anoxybacillus sp. KU2-6(11)	1.53575e+06	2883500	WGS
57275	Anoxybacillus sp. SK3-4	654421	2650307	WGS
60302	Anoxybacillus tepidamans PS2	1.38236e+06	3364000	WGS
57437	Aphanizomenon flos-aquae 2012/KM/D3	1.53291e+06	5741771	WGS
57437	Aphanizomenon flos-aquae NIES-81	284503	5653112	WGS
46612	Aphanocapsa montana BDHKU210001	1.57448e+06	11500044	WGS
60840	Aquabacterium sp. NJ1	1.5383e+06	5020969	WGS
50871	Aquamicrobium defluvii	69279.3	4769664	WGS
58701	Aquaspirillum serpens DSM 68	1.121e+06	2611450	WGS
61029	Aquifex aeolicus VF5	224325	1590791	Complete
61941	Aquimarina agarilytica ZC1	620914	4242875	WGS
58702	Aquimarina latercula DSM 2041	1.12101e+06	6234349	WGS
60539	Aquimarina macrocephali JAMB N27	1.44367e+06	6009140	WGS
58703	Aquimarina muelleri DSM 19832	1.12101e+06	4871214	WGS
60091	Aquimarina sp. 22II-S11-z7	1.31712e+06	5687990	WGS
59994	Aquimarina sp. SW150	1.29642e+06	5221746	WGS
59995	Aquimarina sp. XH134	1.29642e+06	6154069	WGS
62008	Arcanobacterium haemolyticum DSM 20595	644284	1986154	Complete
59589	Arcanobacterium sp. S3PF19	1.21959e+06	1490259	WGS
57576	Arcobacter butzleri 7h1h	1.03617e+06	2196000	WGS
57576	Arcobacter butzleri ED-1	944546	2256675	Complete
57576	Arcobacter butzleri JV22	888827	2295999	WGS
57576	Arcobacter butzleri RM4018	367738	2341251	Complete
60534	Arcobacter cibarius LMG 21996	1.4426e+06	2189861	WGS
61840	Arcobacter nitrofigilis DSM 7299	572480	3192235	Complete
39857	Arcobacter sp. AF1028	1.35537e+06	2400333	WGS
39857	Arcobacter sp. AF1078	1.35537e+06	2478088	WGS
55051	Arcobacter sp. AF1430	1.35537e+06	2236210	WGS
55051	Arcobacter sp. AF1440	1.35537e+06	2287770	WGS
55051	Arcobacter sp. AF1581	1.35538e+06	2258685	WGS
62610	Arcobacter sp. L	944547	2947662	Complete
59255	Arcticibacter svalbardensis MN12-7	1.1506e+06	4681531	WGS
61939	Arenibacter algicola	616991	5550230	WGS
58704	Arenibacter certesii DSM 19833	1.12101e+06	4975964	WGS
58705	Arenibacter latericius DSM 15913	1.12101e+06	4471796	WGS
44751	Arenimonas composti DSM 18010	1.12101e+06	3136455	WGS
44751	Arenimonas composti TR7-09 = DSM 18010	1.12101e+06	3161214	WGS
58706	Arenimonas donghaensis DSM 18148 = HO3-R19	1.12101e+06	2977060	WGS
60305	Arenimonas malthae CC-JY-1	1.38405e+06	3114078	WGS
60306	Arenimonas metalli CF5-1	1.38406e+06	3056622	WGS
44750	Arenimonas oryziterrae DSM 21050	1.12102e+06	3073023	WGS
44750	Arenimonas oryziterrae DSM 21050 = YC6267	1.12102e+06	3093011	WGS
58707	Arhodomonas aquaeolei DSM 8974	1.12102e+06	3941225	WGS
62271	Aromatoleum aromaticum EbN1	76114.8	4727255	Complete
58708	Arsenicicoccus bolidensis DSM 15745	1.12102e+06	3989996	WGS
57665	Arsenophonus endosymbiont str. Hangzhou of Nilaparvata lugens	1.24702e+06	2953839	WGS
58709	Arsenophonus nasoniae DSM 15247	1.12102e+06	3643645	WGS
60374	Arthrobacter albus DNF00011	1.40106e+06	2476648	WGS
62347	Arthrobacter arilaitensis Re117	861360	3909664	Complete
54916	Arthrobacter aurescens TC1	290340	5226648	Complete
58710	Arthrobacter castelli DSM 16402	1.12102e+06	4578397	WGS
61551	Arthrobacter chlorophenolicus A6	452864	4980870	Complete
59775	Arthrobacter crystallopoietes BAB-32	1.24648e+06	4337802	WGS
59877	Arthrobacter gangotriensis Lz1y	1.27692e+06	4310970	WGS
58504	Arthrobacter globiformis NBRC 12137	1.07797e+06	4923006	WGS
56451	Arthrobacter nicotinovorans 231Sha2.1M6	1.30488e+06	4761354	WGS
56451	Arthrobacter nicotinovorans 26Cvi1.1E	1.29204e+06	4682479	WGS
61333	Arthrobacter phenanthrenivorans SWC37	361576	4328053	WGS
62546	Arthrobacter phenanthrenivorans Sphe3	930171	4535320	Complete
58711	Arthrobacter sanguinis DSM 21259	1.12102e+06	2925010	WGS
58273	Arthrobacter sp. 131MFCol6.1	1.15794e+06	4429091	WGS
59282	Arthrobacter sp. 135MFCol5.1	1.15805e+06	4448672	WGS
55266	Arthrobacter sp. 161MFSha2.1	1.15112e+06	4567605	WGS
59260	Arthrobacter sp. 162MFSha1.1	1.15112e+06	4395885	WGS
58628	Arthrobacter sp. 31Y	1.11563e+06	5079550	WGS
61087	Arthrobacter sp. 35/47	269454	3441049	WGS
59181	Arthrobacter sp. 35W	1.13244e+06	4652932	WGS
58273	Arthrobacter sp. 9MFCol3.1	1.1504e+06	4500770	WGS
61919	Arthrobacter sp. A3	595593	4529510	WGS
60219	Arthrobacter sp. AK-YN10	1.34982e+06	4818001	WGS
60072	Arthrobacter sp. Br18	1.31295e+06	3509968	WGS
55309	Arthrobacter sp. CAL618	1.05577e+06	3644784	WGS
61134	Arthrobacter sp. FB24	290399	5070478	Complete
60073	Arthrobacter sp. H14	1.31296e+06	4196871	WGS
59856	Arthrobacter sp. H20	1.26798e+06	3413467	WGS
59855	Arthrobacter sp. H5	1.26797e+06	4287721	WGS
58273	Arthrobacter sp. I3	218158	4674625	WGS
60721	Arthrobacter sp. L77	1.49669e+06	3608439	WGS
59426	Arthrobacter sp. M2012083	1.19771e+06	4624814	WGS
58580	Arthrobacter sp. MA-N2	1.10119e+06	4829531	WGS
55266	Arthrobacter sp. MWB30	1.53441e+06	4647008	WGS
60718	Arthrobacter sp. PAMC25486	1.49461e+06	4593579	Complete
58574	Arthrobacter sp. PAO19	1.09676e+06	3624197	WGS
54916	Arthrobacter sp. Rue61a	1.11896e+06	5081038	Complete
62120	Arthrobacter sp. SJCon	683150	4376176	WGS
55309	Arthrobacter sp. TB 23	494420	3541307	WGS
61644	Arthrobacter sp. TB 26	494421	4279659	WGS
60556	Arthrobacter sp. UNC362MFTsu5.1	1.44904e+06	5099780	WGS
61638	Arthrobacter sp. W1	490910	3785402	WGS
53544	Arthrospira maxima CS-328	513049	5999400	WGS
62151	Arthrospira platensis NIES-39	696747	6788435	Complete
53544	Arthrospira sp. PCC 8005	376220	6142205	WGS
59700	Asaia astilbis JCM 15831	1.2365e+06	3147420	WGS
59713	Asaia platycodi JCM 25414	1.23653e+06	3150970	WGS
39834	Asaia platycodi SF2.1	1.38223e+06	3420650	WGS
59702	Asaia prunellae JCM 25354	1.2365e+06	3182740	WGS
39834	Asaia sp. SF2.1	406101	3366138	WGS
58712	Asticcacaulis benevestitus DSM 16100 = ATCC BAA-896	1.12102e+06	4973269	WGS
62188	Asticcacaulis biprosthecum C19	715226	5269566	WGS
61843	Asticcacaulis excentricus CB 48	573066	4308776	Complete
59926	Asticcacaulis sp. AC402	1.28236e+06	4300272	WGS
59925	Asticcacaulis sp. AC460	1.28236e+06	5383382	WGS
59927	Asticcacaulis sp. AC466	1.28236e+06	4680784	WGS
59928	Asticcacaulis sp. YBE204	1.28236e+06	4134864	WGS
60140	Atopobacter phocae ATCC BAA-285	1.33623e+06	1657891	WGS
58713	Atopobium fossor DSM 15642	1.12102e+06	1656594	WGS
50290	Atopobium minutum 10063974	997872	1706361	WGS
59960	Atopobium parvulum DNF00906	1.28747e+06	1527867	WGS
61692	Atopobium parvulum DSM 20469	521096	1543805	Complete
61781	Atopobium rimae ATCC 49626	553184	1620446	WGS
62583	Atopobium sp. BS2	936550	1603411	WGS
50290	Atopobium sp. BV3Ac4	1.11112e+06	1712268	WGS
59401	Atopobium sp. ICM42b	1.19062e+06	1557083	WGS
57735	Atopobium sp. ICM58	1.10503e+06	2367865	WGS
59453	Atopobium sp. oral taxon 199 str. F0494	1.2036e+06	1659349	WGS
60098	Atopobium sp. oral taxon 810 str. F0209	1.32177e+06	1943357	WGS
48504	Atopobium vaginae DSM 15829	525256	1417439	WGS
48504	Atopobium vaginae DSM 15829 (Prj:53885)	525256	1417749	WGS
62370	Atopobium vaginae PB189-T1-4	866774	1438947	WGS
58714	Atopococcus tabaci DSM 17538	1.12102e+06	2264931	WGS
58715	Aurantimonas coralicida DSM 14790	1.12103e+06	4607015	WGS
61124	Aurantimonas manganoxydans SI85-9A1	287752	4285343	WGS
61350	Aureimonas altamirensis ON-56566	370622	4200047	WGS
58716	Aureimonas ureilytica DSM 18598	1.12103e+06	5084841	WGS
60079	Aureispira sp. CCB-QB1	1.31342e+06	7367600	WGS
59387	Austwickia chelonae NBRC 105200	1.18461e+06	3448882	WGS
58029	Avibacterium paragallinarum 221	1.27897e+06	2654786	WGS
58029	Avibacterium paragallinarum 72	948565	2302540	WGS
58029	Avibacterium paragallinarum JF4211	1.35175e+06	2869246	WGS
61951	Azoarcus sp. BH72	62928.8	4376040	Complete
62237	Azoarcus sp. KH32C	748247	5818755	Complete
59811	Azoarcus toluclasticus ATCC 700605	1.26162e+06	5919126	WGS
58717	Azohydromonas australica DSM 1124	1.12103e+06	8733646	WGS
58718	Azonexus hydrophilus DSM 23864	1.12103e+06	3332710	WGS
61510	Azorhizobium caulinodans ORS 571	438753	5369772	Complete
58394	Azorhizobium doebereinerae UFLA1-100	1.03886e+06	5808702	WGS
58073	Azospirillum brasilense	192.45	7391280	Complete
58073	Azospirillum brasilense FP2	1.26247e+06	6871444	WGS
58073	Azospirillum brasilense Sp245	192.7	7530241	Complete
58719	Azospirillum halopraeferens DSM 3675	1.12103e+06	6506262	WGS
58720	Azospirillum irakense DSM 11586	1.12103e+06	5444038	WGS
62354	Azospirillum lipoferum 4B	862719	4114855	Complete
62625	Azospirillum sp. B4	95605.3	7257378	WGS
60255	Azospirillum sp. B510	137722	7599738	Complete
60116	Azotobacter chroococcum NCIMB 8003	1.32831e+06	5192286	Complete
42916	Azotobacter vinelandii CA	1.28333e+06	5366370	Complete
42916	Azotobacter vinelandii CA6	1.28333e+06	5323210	Complete
42916	Azotobacter vinelandii DJ	322710	5365318	Complete
58721	Azovibrio restrictus DSM 23866	1.12104e+06	3994385	WGS
53539	Bacillaceae bacterium MTCC 10057	590062	3688913	WGS
53539	Bacillaceae bacterium MTCC 8252	1.12372e+06	3742128	WGS
61530	Bacillus acidiproducens DSM 23148	444461	3313239	WGS
56522	Bacillus aerophilus C772	293389	3753035	WGS
58722	Bacillus aidingensis DSM 18341	1.12109e+06	4416948	WGS
59729	Bacillus akibai JCM 9157	1.23697e+06	4733264	WGS
59575	Bacillus alcalophilus ATCC 27647	1.21817e+06	4190066	WGS
56522	Bacillus altitudinis 41KF2b	1.17854e+06	3678940	WGS
56522	Bacillus altitudinis B-388	293388	3706590	WGS
53752	Bacillus amyloliquefaciens DSM 7	692421	3980199	Complete
57149	Bacillus amyloliquefaciens EBL11	1.45716e+06	3929318	WGS
57149	Bacillus amyloliquefaciens EGD-AQ14	1.39037e+06	4204026	WGS
57149	Bacillus amyloliquefaciens FZB42	326424	3918589	Complete
57149	Bacillus amyloliquefaciens HB-26	1.36605e+06	3989358	WGS
57149	Bacillus amyloliquefaciens IT-45	1.09104e+06	3932410	WGS
55807	Bacillus amyloliquefaciens JJC33M	1390.11	3961663	WGS
57149	Bacillus amyloliquefaciens LFB112	1.41517e+06	3942754	Complete
53752	Bacillus amyloliquefaciens LL3	1.00158e+06	4001985	Complete
57149	Bacillus amyloliquefaciens LPL-K103	1390.11	3873267	WGS
57149	Bacillus amyloliquefaciens SQR9	1.42314e+06	4117020	Complete
53752	Bacillus amyloliquefaciens TA208	999891	3937511	Complete
57149	Bacillus amyloliquefaciens TF28	1390.11	3932855	WGS
57149	Bacillus amyloliquefaciens UASWS BA1	1.38405e+06	3926316	WGS
53752	Bacillus amyloliquefaciens XH7	1.03484e+06	3939203	Complete
57149	Bacillus amyloliquefaciens Y2	1.12621e+06	4238624	Complete
57149	Bacillus amyloliquefaciens subsp. amyloliquefaciens DC-12	1.19829e+06	3999317	WGS
57149	Bacillus amyloliquefaciens subsp. plantarum	1.0544e+06	3992230	WGS
57149	Bacillus amyloliquefaciens subsp. plantarum M27	1.17719e+06	3852723	WGS
57149	Bacillus amyloliquefaciens subsp. plantarum NAU-B3	1.38573e+06	4204608	Complete
57149	Bacillus amyloliquefaciens subsp. plantarum TrigoCor1448	1.44909e+06	3957904	Complete
57149	Bacillus amyloliquefaciens subsp. plantarum YAU B9601-Y2	1.15578e+06	4242774	Complete
57688	Bacillus anthracis 2000031006	1392.81	5443372	WGS
57688	Bacillus anthracis 2000031008	1392.78	5451012	WGS
57688	Bacillus anthracis 2000031023	1392.79	5435540	WGS
57688	Bacillus anthracis 2000031027	1392.8	5445547	WGS
57688	Bacillus anthracis 2000031031	1392.6	5449304	WGS
57688	Bacillus anthracis 2000031038	1392.61	5431066	WGS
57688	Bacillus anthracis 2000031039	1392.62	5449617	WGS
57688	Bacillus anthracis 2000031052	1392.63	5274089	WGS
57688	Bacillus anthracis 2000031075	1392.64	5353374	WGS
57688	Bacillus anthracis 2000031709	1392.65	5449595	WGS
57688	Bacillus anthracis 2000031765	1392.66	5449419	WGS
57688	Bacillus anthracis 2000032819	1392.67	5450315	WGS
57688	Bacillus anthracis 2000032832	1392.68	5449259	WGS
57688	Bacillus anthracis 2000032879	1392.69	5447483	WGS
57688	Bacillus anthracis 2000032892	1392.7	5450531	WGS
57688	Bacillus anthracis 2000032951	1392.71	5431934	WGS
57688	Bacillus anthracis 2000032967	1392.72	5443365	WGS
57688	Bacillus anthracis 2000032968	1392.73	5296787	WGS
57688	Bacillus anthracis 2000032975	1392.74	5439151	WGS
57688	Bacillus anthracis 2000032979	1392.75	5433205	WGS
57688	Bacillus anthracis 2000032989	1392.76	5443959	WGS
[truncated: 29,009 more rows]

## Sheet: Table S6
Supplemental table S6. Species-level coverage of MIDAS reference database across different environments source: where the data was obtained from (NCBI SRA or MG-RAST) accession: sequencing run accession or identifier database coverage: estimated percent of microbes with sequenced representative at species level in database biome: the environment sub-biome: additional info on biome reference: see …
source	accession	database_coverage	biome	sub-biome	reference		References
NCBI SRA	ERR414233	19.1637	Human-Gut	Denmark	1		1	Li J et al. 2014. An integrated catalog of reference genes in the human gut microbiome. Nature biotechnology 32(8): 834-841.
NCBI SRA	ERR414236	33.4186	Human-Gut	Denmark	1		2	Sunagawa S et al. 2015. Ocean plankton. Structure and function of the global ocean microbiome. Science 348(6237): 1261359.
NCBI SRA	ERR414244	49.8332	Human-Gut	Denmark	1		3	Xiao L et al. 2015. A catalog of the mouse gut metagenome. Nature biotechnology 33(10): 1103-1108.
NCBI SRA	ERR414254	35.7523	Human-Gut	Denmark	1		4	Fierer N et al. 2012. Cross-biome metagenomic analyses of soil microbial communities and their functional attributes. Proceedings of the National Academy of Sciences.
NCBI SRA	ERR414262	46.0048	Human-Gut	Denmark	1		5	The Human Microbiome Project Consortium. 2012. A framework for human microbiome research. Nature 486(7402): 215-221.
NCBI SRA	ERR414282	28.8228	Human-Gut	Denmark	1		6	Tung J et al. 2015. Social networks predict gut microbiome composition in wild baboons. eLife 4.
NCBI SRA	ERR414310	29.9696	Human-Gut	Denmark	1		7	Obregon-Tito AJ et al. 2015. Subsistence strategies in traditional societies distinguish gut microbiomes. Nature communications 6: 6505.
NCBI SRA	ERR414326	27.9879	Human-Gut	Denmark	1		8	Rampelli S et al. 2015. Metagenome Sequencing of the Hadza Hunter-Gatherer Gut Microbiota. Current biology : CB 25(13): 1682-1693.
NCBI SRA	ERR414335	64.5122	Human-Gut	Denmark	1		9	Qin J et al. 2012. A metagenome-wide association study of gut microbiota in type 2 diabetes. Nature 490(7418): 55-60.
NCBI SRA	ERR414349	44.5741	Human-Gut	Denmark	1
NCBI SRA	ERR414372	47.339	Human-Gut	Spain	1
NCBI SRA	ERR414391	22.6639	Human-Gut	Spain	1
NCBI SRA	ERR414438	65.3989	Human-Gut	Spain	1
NCBI SRA	ERR414448	32.7265	Human-Gut	Spain	1
NCBI SRA	ERR414453	46.3852	Human-Gut	Spain	1
NCBI SRA	ERR414469	60.786	Human-Gut	Spain	1
NCBI SRA	ERR414480	41.9085	Human-Gut	Spain	1
NCBI SRA	ERR414481	35.6087	Human-Gut	Spain	1
NCBI SRA	ERR414488	47.9228	Human-Gut	Spain	1
NCBI SRA	ERR414490	43.5446	Human-Gut	Spain	1
NCBI SRA	ERR594315	7.13671	Marine	Deep chlorophyll water layer	2
NCBI SRA	ERR598952	3.09888	Marine	Deep chlorophyll water layer	2
NCBI SRA	ERR598962	4.78073	Marine	Deep chlorophyll water layer	2
NCBI SRA	ERR599018	5.24515	Marine	Deep chlorophyll water layer	2
NCBI SRA	ERR599046	8.0283	Marine	Deep chlorophyll water layer	2
NCBI SRA	ERR599061	3.29205	Marine	Deep chlorophyll water layer	2
NCBI SRA	ERR599113	6.63613	Marine	Deep chlorophyll water layer	2
NCBI SRA	ERR599153	16.99	Marine	Deep chlorophyll water layer	2
NCBI SRA	ERR598956	0.715529	Marine	Epipelagic mixed water layer	2
NCBI SRA	ERR598988	1.2949	Marine	Epipelagic mixed water layer	2
NCBI SRA	ERR598998	0.614671	Marine	Epipelagic mixed water layer	2
NCBI SRA	ERR599084	1.36364	Marine	Epipelagic mixed water layer	2
NCBI SRA	ERR599089	1.45291	Marine	Epipelagic mixed water layer	2
NCBI SRA	ERR599117	0.610899	Marine	Epipelagic mixed water layer	2
NCBI SRA	ERR599157	0.546173	Marine	Epipelagic mixed water layer	2
NCBI SRA	ERR599161	1.33736	Marine	Epipelagic mixed water layer	2
NCBI SRA	ERR598981	0.978625	Marine	Mesopelagic zone	2
NCBI SRA	ERR599031	1.53013	Marine	Mesopelagic zone	2
NCBI SRA	ERR599034	2.43687	Marine	Mesopelagic zone	2
NCBI SRA	ERR599055	2.8842	Marine	Mesopelagic zone	2
NCBI SRA	ERR599131	2.93242	Marine	Mesopelagic zone	2
NCBI SRA	ERR599149	13.2273	Marine	Mesopelagic zone	2
NCBI SRA	ERR599154	3.78442	Marine	Mesopelagic zone	2
NCBI SRA	ERR594316	5.84445	Marine	Surface water layer	2
NCBI SRA	ERR598997	4.60335	Marine	Surface water layer	2
NCBI SRA	ERR599003	11.1617	Marine	Surface water layer	2
NCBI SRA	ERR599063	1.42413	Marine	Surface water layer	2
NCBI SRA	ERR599098	3.05081	Marine	Surface water layer	2
NCBI SRA	ERR599140	10.5016	Marine	Surface water layer	2
NCBI SRA	ERR599155	21.1114	Marine	Surface water layer	2
NCBI SRA	ERR675653	2.22682	Mouse-Gut	Laboratory environment	3
NCBI SRA	ERR675654	2.93086	Mouse-Gut	Laboratory environment	3
NCBI SRA	ERR675656	2.45542	Mouse-Gut	Laboratory environment	3
NCBI SRA	ERR675658	2.29532	Mouse-Gut	Laboratory environment	3
NCBI SRA	ERR675659	2.06804	Mouse-Gut	Laboratory environment	3
NCBI SRA	ERR675660	4.56345	Mouse-Gut	Laboratory environment	3
NCBI SRA	ERR675661	3.00597	Mouse-Gut	Laboratory environment	3
NCBI SRA	ERR675662	2.71692	Mouse-Gut	Laboratory environment	3
NCBI SRA	ERR675664	9.82432	Mouse-Gut	Laboratory environment	3
NCBI SRA	ERR675667	11.7633	Mouse-Gut	Laboratory environment	3
MGRAST	mgm4477803.3	2.7569	Soil	Deserts	4
MGRAST	mgm4477805.3	0.765544	Soil	Deserts	4
MGRAST	mgm4477872.3	1.33711	Soil	Deserts	4
MGRAST	mgm4477873.3	1.6828	Soil	Deserts	4
MGRAST	mgm4477900.3	0.107539	Soil	Deserts	4
MGRAST	mgm4477901.3	1.43209	Soil	Deserts	4
MGRAST	mgm4477902.3	0.301061	Soil	Deserts	4
MGRAST	mgm4477903.3	0.368121	Soil	Deserts	4
MGRAST	mgm4477904.3	0.26879	Soil	Deserts	4
MGRAST	mgm4477876.3	1.31219	Soil	Temperate-forest	4
MGRAST	mgm4477877.3	1.66983	Soil	Temperate-forest	4
MGRAST	mgm4477899.3	0.488181	Soil	Temperate-forest	4
MGRAST	mgm4477804.3	1.2728	Soil	Temperate-grasslands	4
MGRAST	mgm4477807.3	1.2136	Soil	Tropical-forest	4
MGRAST	mgm4477875.3	0.544777	Soil	Tropical-forest	4
MGRAST	mgm4477874.3	1.14825	Soil	Tundra	4
NCBI SRA	SRS011105	78.7776	Human-Airways	USA	5
NCBI SRA	SRS013876	73.2886	Human-Airways	USA	5
NCBI SRA	SRS014464	67.9089	Human-Airways	USA	5
NCBI SRA	SRS015450	14.9333	Human-Airways	USA	5
NCBI SRA	SRS016105	65.7206	Human-Airways	USA	5
NCBI SRA	SRS016292	55.9462	Human-Airways	USA	5
NCBI SRA	SRS016434	59.7624	Human-Airways	USA	5
NCBI SRA	SRS017044	70.2207	Human-Airways	USA	5
NCBI SRA	SRS017697	74.0478	Human-Airways	USA	5
NCBI SRA	SRS046973	59.0382	Human-Airways	USA	5
NCBI SRA	SRS053437	57.6925	Human-Airways	USA	5
NCBI SRA	SRS058213	79.2495	Human-Airways	USA	5
NCBI SRA	SRR059338	54.2895	Human-Gut	USA	5
NCBI SRA	SRR059344	57.7809	Human-Gut	USA	5
NCBI SRA	SRR059372	70.1529	Human-Gut	USA	5
NCBI SRA	SRR059422	68.9732	Human-Gut	USA	5
NCBI SRA	SRR059855	47.7142	Human-Gut	USA	5
NCBI SRA	SRR059887	66.6219	Human-Gut	USA	5
NCBI SRA	SRR060371	41.6001	Human-Gut	USA	5
NCBI SRA	SRR061215	19.3002	Human-Gut	USA	5
NCBI SRA	SRR061331	29.0088	Human-Gut	USA	5
NCBI SRA	SRR061556	69.047	Human-Gut	USA	5
NCBI SRA	SRR061557	44.5776	Human-Gut	USA	5
NCBI SRA	SRR061558	45.9869	Human-Gut	USA	5
NCBI SRA	SRR061930	70.8406	Human-Gut	USA	5
NCBI SRA	SRR062323	26.3384	Human-Gut	USA	5
NCBI SRA	SRR062348	63.9336	Human-Gut	USA	5
NCBI SRA	SRR062457	39.2297	Human-Gut	USA	5
NCBI SRA	SRR063471	70.001	Human-Gut	USA	5
NCBI SRA	SRR513827	42.0386	Human-Gut	USA	5
NCBI SRA	SRR514192	38.4622	Human-Gut	USA	5
NCBI SRA	SRR514196	65.5332	Human-Gut	USA	5
NCBI SRA	SRS011140	53.5146	Human-Oral	USA	5
NCBI SRA	SRS012279	49.5279	Human-Oral	USA	5
NCBI SRA	SRS014686	63.2742	Human-Oral	USA	5
NCBI SRA	SRS015374	61.4446	Human-Oral	USA	5
NCBI SRA	SRS015436	58.3803	Human-Oral	USA	5
NCBI SRA	SRS015650	60.4266	Human-Oral	USA	5
NCBI SRA	SRS016086	55.3722	Human-Oral	USA	5
NCBI SRA	SRS018157	41.6838	Human-Oral	USA	5
NCBI SRA	SRS018300	53.7762	Human-Oral	USA	5
NCBI SRA	SRS013258	84.2799	Human-Skin	USA	5
NCBI SRA	SRS015381	74.0284	Human-Skin	USA	5
NCBI SRA	SRS017851	88.727	Human-Skin	USA	5
NCBI SRA	SRS058221	86.3494	Human-Skin	USA	5
NCBI SRA	SRS011584	65.443	Human-Urogenital	USA	5
NCBI SRA	SRS012294	77.292	Human-Urogenital	USA	5
NCBI SRA	SRS014343	63.3325	Human-Urogenital	USA	5
NCBI SRA	SRS015054	67.0257	Human-Urogenital	USA	5
NCBI SRA	SRS017700	71.3489	Human-Urogenital	USA	5
NCBI SRA	SRS019989	74.6889	Human-Urogenital	USA	5
NCBI SRA	SRS022545	49.2424	Human-Urogenital	USA	5
NCBI SRA	SRS023468	23.6067	Human-Urogenital	USA	5
NCBI SRA	SRS050184	67.1577	Human-Urogenital	USA	5
NCBI SRA	SRR1747018	2.06925	Baboon-Gut	Kenya	6
NCBI SRA	SRR1747019	1.82975	Baboon-Gut	Kenya	6
NCBI SRA	SRR1747020	2.09512	Baboon-Gut	Kenya	6
NCBI SRA	SRR1747021	1.71258	Baboon-Gut	Kenya	6
NCBI SRA	SRR1747022	0.710704	Baboon-Gut	Kenya	6
NCBI SRA	SRR1747023	0.785885	Baboon-Gut	Kenya	6
NCBI SRA	SRR1747024	4.37822	Baboon-Gut	Kenya	6
NCBI SRA	SRR1747025	1.52233	Baboon-Gut	Kenya	6
NCBI SRA	SRR1747026	1.99781	Baboon-Gut	Kenya	6
NCBI SRA	SRR1747027	1.15955	Baboon-Gut	Kenya	6
NCBI SRA	SRR1747028	1.47568	Baboon-Gut	Kenya	6
NCBI SRA	SRR1747029	2.33893	Baboon-Gut	Kenya	6
NCBI SRA	SRR1747030	3.29488	Baboon-Gut	Kenya	6
NCBI SRA	SRR1747031	3.6464	Baboon-Gut	Kenya	6
NCBI SRA	SRR1747032	2.39479	Baboon-Gut	Kenya	6
NCBI SRA	SRR1747033	0.643207	Baboon-Gut	Kenya	6
NCBI SRA	SRR1747034	0.933483	Baboon-Gut	Kenya	6
NCBI SRA	SRR1747035	0.584062	Baboon-Gut	Kenya	6
NCBI SRA	SRR1747036	1.55054	Baboon-Gut	Kenya	6
NCBI SRA	SRR1747037	0.946336	Baboon-Gut	Kenya	6
NCBI SRA	SRR1747038	2.75472	Baboon-Gut	Kenya	6
NCBI SRA	SRR1747039	0.858693	Baboon-Gut	Kenya	6
NCBI SRA	SRR1747040	2.1043	Baboon-Gut	Kenya	6
NCBI SRA	SRR1747041	1.5608	Baboon-Gut	Kenya	6
NCBI SRA	SRR1747042	2.69052	Baboon-Gut	Kenya	6
NCBI SRA	SRR1747043	1.97522	Baboon-Gut	Kenya	6
NCBI SRA	SRR1747044	1.18983	Baboon-Gut	Kenya	6
NCBI SRA	SRR1747045	1.0153	Baboon-Gut	Kenya	6
NCBI SRA	SRR1747046	0.688998	Baboon-Gut	Kenya	6
NCBI SRA	SRR1747047	0.963316	Baboon-Gut	Kenya	6
NCBI SRA	SRR1747048	1.6424	Baboon-Gut	Kenya	6
NCBI SRA	SRR1747049	1.50335	Baboon-Gut	Kenya	6
NCBI SRA	SRR1747050	1.10525	Baboon-Gut	Kenya	6
NCBI SRA	SRR1747051	1.47067	Baboon-Gut	Kenya	6
NCBI SRA	SRR1747052	1.25732	Baboon-Gut	Kenya	6
NCBI SRA	SRR1747053	1.37611	Baboon-Gut	Kenya	6
NCBI SRA	SRR1747054	0.821041	Baboon-Gut	Kenya	6
NCBI SRA	SRR1747055	1.73937	Baboon-Gut	Kenya	6
NCBI SRA	SRR1747056	1.91514	Baboon-Gut	Kenya	6
NCBI SRA	SRR1747057	2.24847	Baboon-Gut	Kenya	6
NCBI SRA	SRR1747058	2.06981	Baboon-Gut	Kenya	6
NCBI SRA	SRR1747059	1.91839	Baboon-Gut	Kenya	6
NCBI SRA	SRR1747060	0.919852	Baboon-Gut	Kenya	6
NCBI SRA	SRR1747061	0.805806	Baboon-Gut	Kenya	6
NCBI SRA	SRR1747062	1.03565	Baboon-Gut	Kenya	6
NCBI SRA	SRR1747063	1.39529	Baboon-Gut	Kenya	6
NCBI SRA	SRR1747064	1.28753	Baboon-Gut	Kenya	6
NCBI SRA	SRR1747065	1.26104	Baboon-Gut	Kenya	6
NCBI SRA	SRR1761664	19.0075	Human-Gut	Peru	7
NCBI SRA	SRR1761665	10.1966	Human-Gut	Peru	7
NCBI SRA	SRR1761666	23.1	Human-Gut	Peru	7
NCBI SRA	SRR1761667	20.9202	Human-Gut	Peru	7
NCBI SRA	SRR1761668	7.05563	Human-Gut	Peru	7
NCBI SRA	SRR1761669	4.0464	Human-Gut	Peru	7
NCBI SRA	SRR1761670	8.03837	Human-Gut	Peru	7
NCBI SRA	SRR1761671	13.9349	Human-Gut	Peru	7
NCBI SRA	SRR1761672	5.44719	Human-Gut	Peru	7
NCBI SRA	SRR1761673	16.5157	Human-Gut	Peru	7
NCBI SRA	SRR1761674	17.3829	Human-Gut	Peru	7
NCBI SRA	SRR1761675	15.0259	Human-Gut	Peru	7
NCBI SRA	SRR1761698	18.9631	Human-Gut	Peru	7
NCBI SRA	SRR1761699	9.28809	Human-Gut	Peru	7
NCBI SRA	SRR1761700	17.2029	Human-Gut	Peru	7
NCBI SRA	SRR1761701	30.0998	Human-Gut	Peru	7
NCBI SRA	SRR1761702	7.37939	Human-Gut	Peru	7
NCBI SRA	SRR1761703	9.70894	Human-Gut	Peru	7
NCBI SRA	SRR1761704	3.34685	Human-Gut	Peru	7
NCBI SRA	SRR1761705	17.2281	Human-Gut	Peru	7
NCBI SRA	SRR1761706	20.3152	Human-Gut	Peru	7
NCBI SRA	SRR1761707	23.011	Human-Gut	Peru	7
NCBI SRA	SRR1761708	38.5249	Human-Gut	Peru	7
NCBI SRA	SRR1761709	9.30428	Human-Gut	Peru	7
NCBI SRA	SRR1761710	28.3851	Human-Gut	Peru	7
NCBI SRA	SRR1761711	9.51062	Human-Gut	Peru	7
NCBI SRA	SRR1761712	3.01699	Human-Gut	Peru	7
NCBI SRA	SRR1761713	3.07119	Human-Gut	Peru	7
NCBI SRA	SRR1761714	10.0855	Human-Gut	Peru	7
NCBI SRA	SRR1761715	9.50958	Human-Gut	Peru	7
NCBI SRA	SRR1761716	12.9864	Human-Gut	Peru	7
NCBI SRA	SRR1761717	6.21834	Human-Gut	Peru	7
NCBI SRA	SRR1761718	18.8018	Human-Gut	Peru	7
NCBI SRA	SRR1761719	10.661	Human-Gut	Peru	7
NCBI SRA	SRR1761720	23.4827	Human-Gut	Peru	7
NCBI SRA	SRR1761721	10.1463	Human-Gut	Peru	7
NCBI SRA	SRR1927149	4.39814	Human-Gut	Tanzania	8
NCBI SRA	SRR1929408	15.438	Human-Gut	Tanzania	8
NCBI SRA	SRR1929484	12.7557	Human-Gut	Tanzania	8
NCBI SRA	SRR1929485	14.835	Human-Gut	Tanzania	8
NCBI SRA	SRR1929563	7.16612	Human-Gut	Tanzania	8
NCBI SRA	SRR1929574	5.53103	Human-Gut	Tanzania	8
NCBI SRA	SRR1930121	7.8114	Human-Gut	Tanzania	8
NCBI SRA	SRR1930122	14.899	Human-Gut	Tanzania	8
NCBI SRA	SRR1930123	9.06815	Human-Gut	Tanzania	8
NCBI SRA	SRR1930128	16.4175	Human-Gut	Tanzania	8
NCBI SRA	SRR1930132	20.421	Human-Gut	Tanzania	8
NCBI SRA	SRR1930133	13.2154	Human-Gut	Tanzania	8
NCBI SRA	SRR1930134	4.65027	Human-Gut	Tanzania	8
NCBI SRA	SRR1930136	5.16297	Human-Gut	Tanzania	8
NCBI SRA	SRR1930138	5.23344	Human-Gut	Tanzania	8
NCBI SRA	SRR1930140	12.3192	Human-Gut	Tanzania	8
NCBI SRA	SRR1930141	9.79715	Human-Gut	Tanzania	8
NCBI SRA	SRR1930142	6.53465	Human-Gut	Tanzania	8
NCBI SRA	SRR1930143	5.01583	Human-Gut	Tanzania	8
NCBI SRA	SRR1930144	4.66486	Human-Gut	Tanzania	8
NCBI SRA	SRR1930145	10.4216	Human-Gut	Tanzania	8
NCBI SRA	SRR1930149	6.47885	Human-Gut	Tanzania	8
NCBI SRA	SRR1930176	7.23567	Human-Gut	Tanzania	8
NCBI SRA	SRR1930177	12.209	Human-Gut	Tanzania	8
NCBI SRA	SRR1930179	14.2649	Human-Gut	Tanzania	8
NCBI SRA	SRR1930187	5.69175	Human-Gut	Tanzania	8
NCBI SRA	SRR1930244	8.61446	Human-Gut	Tanzania	8
NCBI SRA	SRR341605	61.7439	Human-Gut	China	9
NCBI SRA	SRR341611	54.9104	Human-Gut	China	9
NCBI SRA	SRR341642	40.1954	Human-Gut	China	9
NCBI SRA	SRR341643	28.5009	Human-Gut	China	9
NCBI SRA	SRR341649	45.7613	Human-Gut	China	9
NCBI SRA	SRR341676	61.341	Human-Gut	China	9
NCBI SRA	SRR341691	63.6471	Human-Gut	China	9
NCBI SRA	SRR341701	74.5723	Human-Gut	China	9
NCBI SRA	SRR341710	62.9064	Human-Gut	China	9
NCBI SRA	SRR413563	66.2725	Human-Gut	China	9
NCBI SRA	SRR413564	33.8851	Human-Gut	China	9
NCBI SRA	SRR413565	39.7755	Human-Gut	China	9
NCBI SRA	SRR413577	54.169	Human-Gut	China	9
NCBI SRA	SRR413584	29.1951	Human-Gut	China	9
NCBI SRA	SRR413610	39.2289	Human-Gut	China	9
NCBI SRA	SRR413635	54.9589	Human-Gut	China	9
NCBI SRA	SRR413645	32.1984	Human-Gut	China	9
NCBI SRA	SRR413664	50.2283	Human-Gut	China	9
NCBI SRA	SRR413735	48.3443	Human-Gut	China	9
NCBI SRA	SRR413747	31.9457	Human-Gut	China	9

## Sheet: Table S7
Supplemental table S7. Selected PhyEco markers for estimating the abundance of species from metagenomes PhyEco Marker: name of gene family. See Table S2 for more information universality: fraction of high-quality genomes (N=31,007) where marker gene found copy_number: average copy number of marker gene across high-quality genomes TPR: True positive rate PPV: Precision F1-score: harmonic mean betw…
PhyEco Marker	universality	copy_number	% ID Cutoff	TPR	PPV	F1-score
B000032	0.98194	0.991099	95.5	0.878	0.833	0.855
B000039	0.994517	1.02477	94.75	0.889	0.823	0.855
B000041	0.998194	1.01074	98	0.846	0.789	0.817
B000062	0.985132	0.991615	97.25	0.845	0.793	0.818
B000063	0.997194	1.00584	96	0.878	0.76	0.815
B000065	0.998065	1.00787	98	0.808	0.805	0.806
B000071	0.993743	1.00632	95.25	0.874	0.8	0.835
B000079	0.998742	1.00655	98	0.839	0.814	0.826
B000080	0.993034	1.00313	95.25	0.879	0.779	0.826
B000081	0.997775	1.00526	97	0.862	0.811	0.836
B000082	0.996775	1.03177	95.25	0.861	0.81	0.835
B000086	0.990164	0.997549	96.75	0.842	0.773	0.806
B000096	0.99326	1.03051	96.75	0.855	0.815	0.835
B000103	0.996291	1.02132	95.25	0.877	0.78	0.826
B000114	0.995162	1.03522	94.5	0.887	0.808	0.846

## Sheet: Table S8
Supplemental table S8. Selected microbial genome sequencing projects used for metagenomic simulations downloaded from the NCBI Sequence Read Archive
run_accession	reads	read_length	technology	genome_name	species_id	count_genomes
SRR999551	3232030	101	Illumina HiSeq 2000	Serratia marcescens BIDMC 50	58205	24
SRR999477	2915651	101	Illumina HiSeq 2000	Enterobacter cloacae UCI 39	57303	12
SRR999453	3602006	101	Illumina HiSeq 2000	Enterobacter aerogenes UCI 27	55704	16
SRR965298	3751227	101	Illumina HiSeq 2000	Providencia alcalifaciens RIMD 1656011	55855	7
SRR965281	2252696	101	Illumina HiSeq 2000	Providencia alcalifaciens PAL-1	43220	2
SRR965257	1589995	101	Illumina HiSeq 2000	Veillonella sp. AS16	62586	1
SRR965245	4833052	101	Illumina HiSeq 2000	Streptococcus sp. ACS2	58022	4
SRR965234	4428527	101	Illumina HiSeq 2000	Streptococcus sp. AS20	57767	4
SRR965231	4508225	101	Illumina HiSeq 2000	Shuttleworthia sp. MSX8B	57139	2
SRR965208	3657328	101	Illumina HiSeq 2000	Prevotella sp. ICM33	58075	4
SRR965199	5115289	101	Illumina HiSeq 2000	Olsenella uli MSTE5	55165	2
SRR965190	4419940	101	Illumina HiSeq 2000	Klebsiella sp. AS10	56762	12
SRR965184	5856328	101	Illumina HiSeq 2000	Fusobacterium sp. CM1	57450	17
SRR965115	4782344	101	Illumina HiSeq 2000	Atopobium sp. ICM42b	59401	1
SRR965031	5995238	101	Illumina HiSeq 2000	Actinomyces sp. ICM54	62582	1
SRR965016	5043257	101	Illumina HiSeq 2000	Treponema socranskii subsp. socranskii VPI DR56BR1116	50175	2
SRR965012	4785661	101	Illumina HiSeq 2000	Porphyromonas catoniae ATCC 51270	58136	2
SRR962290	5058223	101	Illumina HiSeq 2000	Eubacterium sulci ATCC 35585	62452	1
SRR951581	2946793	101	Illumina HiSeq 2000	Fusobacterium nucleatum 13_3C	57855	6
SRR949939	7723743	101	Illumina HiSeq 2000	Bacteroides fragilis str. S6L8	54507	82
SRR948558	6044450	101	Illumina HiSeq 2000	Firmicutes bacterium ASF500	60256	1
SRR850735	3447238	101	Illumina HiSeq 2000	Enterobacter sp. MGH 26	58148	71
SRR850718	3071191	101	Illumina HiSeq 2000	Enterobacter sp. MGH 22	55011	10
SRR848075	8698527	101	Illumina HiSeq 2000	Fusobacterium nucleatum CTI-7	57734	12
SRR835941	3919628	101	Illumina HiSeq 2000	Corynebacterium sp. KPL1824	58243	8
SRR835813	3814487	101	Illumina HiSeq 2000	Streptococcus parasanguinis CC87K	58487	1
SRR835809	4095257	101	Illumina HiSeq 2000	Ruminococcus gnavus CC55_001C	57638	4
SRR835807	3925966	101	Illumina HiSeq 2000	Prevotella oralis CC98A	57209	3
SRR835794	4110838	101	Illumina HiSeq 2000	Propionibacterium sp. KPL2000	56659	7
SRR835778	4120012	101	Illumina HiSeq 2000	Corynebacterium sp. KPL1856	48834	5
SRR807365	4748694	101	Illumina HiSeq 2000	Lachnospiraceae bacterium 3-1	61440	1
SRR800412	5965905	101	Illumina HiSeq 2000	Oscillibacter sp. 1-3	59687	1
SRR800410	5380226	101	Illumina HiSeq 2000	Lachnospiraceae bacterium 3-2	59689	1
SRR800406	5395440	101	Illumina HiSeq 2000	Dorea sp. 5-2	59688	1
SRR776452	6631502	101	Illumina HiSeq 2000	Clostridium bifermentans ATCC 638	57192	4
SRR770237	9187383	101	Illumina HiSeq 2000	Bacteroides stercoris CC31F	56735	2
SRR770060	5051276	101	Illumina HiSeq 2000	Capnocytophaga sp. oral taxon 336 str. F0502	58179	8
SRR770043	4710092	101	Illumina HiSeq 2000	Fusobacterium nucleatum CTI-2	56829	4
SRR769350	5517044	101	Illumina HiSeq 2000	Parabacteroides sp. ASF519	56831	3
SRR769345	4132756	101	Illumina HiSeq 2000	Lactobacillus murinus ASF361	59691	1
SRR769342	5467075	101	Illumina HiSeq 2000	Helicobacter bilis WiWa	58212	7
SRR769338	5218501	101	Illumina HiSeq 2000	Eubacterium plexicaudatum ASF492	59692	1
SRR769334	4550578	101	Illumina HiSeq 2000	Clostridium sp. ASF502	62634	1
SRR769329	4888252	101	Illumina HiSeq 2000	Clostridium sp. ASF356	62633	1
SRR768719	4592856	101	Illumina HiSeq 2000	Paenibacillus barengoltzii G22	56244	2
SRR768717	4858783	101	Illumina HiSeq 2000	Lachnospiraceae bacterium M18-1	59683	1
SRR768715	5103430	101	Illumina HiSeq 2000	Lachnospiraceae bacterium COE1	59684	1
SRR768712	4794567	101	Illumina HiSeq 2000	Lachnospiraceae bacterium A4	61442	1
SRR768707	4331207	101	Illumina HiSeq 2000	Lachnospiraceae bacterium A2	61441	1
SRR768702	4492607	101	Illumina HiSeq 2000	Lachnospiraceae bacterium 28-4	61439	1
SRR768700	5098227	101	Illumina HiSeq 2000	Lachnospiraceae bacterium 10-1	59690	1
SRR768698	5071691	101	Illumina HiSeq 2000	Firmicutes bacterium M10-2	59686	1
SRR768694	4994450	101	Illumina HiSeq 2000	Eubacterium sp. 14-2	59682	1
SRR768690	5444201	101	Illumina HiSeq 2000	Enterorhabdus caecimuris B7	59685	1
SRR768688	5364849	101	Illumina HiSeq 2000	Bacteroides uniformis dnLKV2	57318	7
SRR768686	4775954	101	Illumina HiSeq 2000	Bacteroides thetaiotaomicron dnLKV9	56941	4
SRR768683	5019422	101	Illumina HiSeq 2000	Bacteroides massiliensis dnLKV3	54642	4
SRR768679	5239582	101	Illumina HiSeq 2000	Anaerotruncus sp. G3(2012)	59696	1
SRR748523	7682226	101	Illumina HiSeq 2000	Vibrio parahaemolyticus 605	57034	221
SRR741914	2559438	101	Illumina HiSeq 2000	Acinetobacter radioresistens NIPH 2130	56211	16
SRR741909	2707465	101	Illumina HiSeq 2000	Acinetobacter sp. CIP 51.11	59235	1
SRR736005	2297567	101	Illumina HiSeq 2000	Acinetobacter ursingii DSM 16037 = CIP 107286	57496	4
SRR729310	2404880	101	Illumina HiSeq 2000	Acinetobacter soli NIPH 2899	56206	3
SRR728970	2614562	101	Illumina HiSeq 2000	Acinetobacter gerneri DSM 14967 = CIP 107464	44753	3
SRR728965	2855239	101	Illumina HiSeq 2000	Acinetobacter venetianus RAG-1 = CIP 110063	57626	3
SRR728964	2796698	101	Illumina HiSeq 2000	Acinetobacter bouvetii DSM 14964 = CIP 107468 [PRJNA199256]	44754	2
SRR728947	2655786	101	Illumina HiSeq 2000	Acinetobacter towneri DSM 14962 = CIP 107472	58660	1
SRR728920	2777283	101	Illumina HiSeq 2000	Acinetobacter sp. NIPH 1847	57698	5
SRR728916	2614497	101	Illumina HiSeq 2000	Acinetobacter schindleri CIP 107287	57376	5
SRR728910	2778834	101	Illumina HiSeq 2000	Acinetobacter haemolyticus NIPH 261	57250	8
SRR721210	2608313	101	Illumina HiSeq 2000	Acinetobacter johnsonii ANC 3681	58178	6
SRR721207	5271657	101	Illumina HiSeq 2000	Acinetobacter sp. NIPH 809	59560	1
SRR721174	2747275	101	Illumina HiSeq 2000	Acinetobacter sp. NIPH 2036	57877	2
SRR715770	1586947	101	Illumina HiSeq 2000	Leptospira interrogans serovar Copenhageni str. 200901383	57802	2
SRR715769	1182340	101	Illumina HiSeq 2000	Leptospira interrogans serovar Copenhageni str. Fiocruz LV3992	46161	3
SRR654425	2508521	101	Illumina HiSeq 2000	Acinetobacter sp. NIPH 2168	57495	3
SRR654421	2705246	101	Illumina HiSeq 2000	Acinetobacter baylyi DSM 14961 = CIP 107474	46310	3
SRR654411	4854743	101	Illumina HiSeq 2000	Acinetobacter sp. NIPH 236	57696	2
SRR654370	4754041	101	Illumina HiSeq 2000	Acinetobacter tjernbergiae DSM 14971 = CIP 107465	58659	1
SRR654343	2736343	101	Illumina HiSeq 2000	Acinetobacter sp. ANC 4105	58244	2
SRR654342	5161185	101	Illumina HiSeq 2000	Acinetobacter sp. ANC 3994	59562	1
SRR654323	2689174	101	Illumina HiSeq 2000	Acinetobacter beijerinckii CIP 110307	57526	2
SRR654288	2814908	101	Illumina HiSeq 2000	Acinetobacter sp. NIPH 2171	58016	4
SRR654273	2562769	101	Illumina HiSeq 2000	Acinetobacter junii NIPH 182	57406	7
SRR654263	5643057	101	Illumina HiSeq 2000	Acinetobacter parvus DSM 16617 = CIP 108168	58065	8
SRR654254	2661506	101	Illumina HiSeq 2000	Acinetobacter rudis CIP 110305	61490	1
SRR654241	5036303	101	Illumina HiSeq 2000	Acinetobacter calcoaceticus NIPH 13	57657	8
SRR654233	2767724	101	Illumina HiSeq 2000	Acinetobacter sp. NIPH 298	57689	2
SRR654227	5339965	101	Illumina HiSeq 2000	Acinetobacter sp. NIPH 973	57668	3
SRR654220	6747752	101	Illumina HiSeq 2000	Acinetobacter guillouiae CIP 63.46	57629	4
SRR654200	2423066	101	Illumina HiSeq 2000	Acinetobacter sp. NIPH 713	59559	1
SRR647441	1768533	101	Illumina HiSeq 2000	Treponema vincentii F0403	56325	2
SRR647438	2206277	101	Illumina HiSeq 2000	Treponema socranskii subsp. paredis ATCC 35535	59148	1
SRR647434	1916335	101	Illumina HiSeq 2000	Treponema medium ATCC 700293	59147	1
SRR647433	1767056	101	Illumina HiSeq 2000	Treponema maltophilum ATCC 51939	59146	1
SRR647110	2229158	101	Illumina HiSeq 2000	Corynebacterium pyruviciproducens ATCC BAA-1742	59150	1
SRR643123	3833222	101	Illumina HiSeq 2000	Staphylococcus epidermidis M0881	57523	93
SRR642982	1938917	101	Illumina HiSeq 2000	Enterococcus mundtii ATCC 882 [PRJNA206354]	57674	5
SRR642969	1843276	101	Illumina HiSeq 2000	Enterococcus faecium ATCC 8459 [PRJNA206348]	56710	244
SRR642887	1687766	101	Illumina HiSeq 2000	Enterococcus moraviensis ATCC BAA-383 [PRJNA202679]	44057	2
SRR642158	3857480	101	Illumina HiSeq 2000	Bacillus cereus VD136	57595	10
SRR633646	1853040	101	Illumina HiSeq 2000	Enterococcus malodoratus ATCC 43197 [PRJNA202672]	44064	2
SRR631783	4220397	101	Illumina HiSeq 2000	Chlamydia psittaci 10_881_SC42	52935	3
SRR631189	2459516	101	Illumina HiSeq 2000	Enterococcus caccae ATCC BAA-1240 [PRJNA202681]	44055	2
SRR631098	2379482	101	Illumina HiSeq 2000	Enterococcus raffinosus ATCC 49464 [PRJNA202673]	44063	2
SRR630109	5639448	101	Illumina HiSeq 2000	Propionibacterium sp. oral taxon 192 str. F0372	59454	1
SRR630101	4867583	101	Illumina HiSeq 2000	Atopobium sp. oral taxon 199 str. F0494	59453	1
SRR629772	7569849	101	Illumina HiSeq 2000	Veillonella sp. HPA0037	58169	6
SRR628699	3162583	101	Illumina HiSeq 2000	Streptococcus agalactiae LMG 14747	58299	2
SRR611384	4775075	101	Illumina HiSeq 2000	Bacteroides xylanisolvens CL03T12C04	57185	9
SRR611267	1481675	101	Illumina HiSeq 2000	Leptospira kirschneri str. JB	57296	26
SRR611261	1467234	101	Illumina HiSeq 2000	Leptospira meyeri serovar Semaranga str. Veldrot Semarang 173	56688	2
SRR611260	1738813	101	Illumina HiSeq 2000	Leptospira alstoni serovar Sichuan str. 79601	59577	1
SRR611258	1738981	101	Illumina HiSeq 2000	Leptospira sp. B5-022	59751	1
SRR606276	2632661	101	Illumina HiSeq 2000	Delftia acidovorans CCUG 15835	58200	9
SRR554115	1584299	101	Illumina HiSeq 2000	Leptospira borgpetersenii serovar Mini str. 200901116	53012	2
SRR543717	9772965	101	Illumina HiSeq 2000	Bartonella washoensis 085-0475	55925	2
SRR543716	8768984	101	Illumina HiSeq 2000	Bartonella melophagi K-2C	58548	1
SRR540266	8978550	101	Illumina HiSeq 2000	Bartonella tamiae Th239	48051	2
SRR540264	9670299	101	Illumina HiSeq 2000	Bartonella sp. DB5-6	58550	1
SRR540261	8795391	101	Illumina HiSeq 2000	Bartonella doshiae NCTC 12862	44885	2
SRR540259	9302261	101	Illumina HiSeq 2000	Bartonella birtlesii LL-WM9	51815	5
SRR530265	9209881	101	Illumina HiSeq 2000	Bartonella rattimassiliensis 15908	58547	1
SRR530264	8507217	101	Illumina HiSeq 2000	Bartonella alsatica IBS 382	58546	1
SRR527319	8414328	100	Illumina HiSeq 2000	Xanthomonas axonopodis pv. manihotis str. IBSBF 320	56719	74
SRR519772	2153213	101	Illumina HiSeq 2000	Coprococcus sp. HPP0048	56275	4
SRR519770	1793856	101	Illumina HiSeq 2000	Paenibacillus sp. HGH0039	58207	3
SRR519768	2172617	101	Illumina HiSeq 2000	Paenisporosarcina sp. HGH0030	58510	1
SRR519766	2308502	101	Illumina HiSeq 2000	Streptomyces sp. HGB0020	58511	1
SRR519764	2064836	101	Illumina HiSeq 2000	Staphylococcus sp. HGB0015	58509	1
SRR519763	1745237	101	Illumina HiSeq 2000	Corynebacterium sp. HFH0082	58512	1
SRR515552	7522490	101	Illumina HiSeq 2000	Lactobacillus crispatus FB049-03	56887	11
SRR513841	5607398	101	Illumina HiSeq 2000	Neisseria meningitidis NM3652	58195	199
SRR513625	7046162	101	Illumina HiSeq 2000	Bacteroides fragilis HMW 616	56548	4
SRR507752	3831827	101	Illumina HiSeq 2000	Leptospira interrogans str. L1207	56645	186
SRR507740	2625708	101	Illumina HiSeq 2000	Leptospira fainei serovar Hurstbridge str. BUT 6	59411	1
SRR507728	2017114	101	Illumina HiSeq 2000	Leptospira kmetyi serovar Malaysia str. Bejo-Iso9	58448	1
SRR507727	1568315	101	Illumina HiSeq 2000	Leptospira noguchii str. 2001034031	57887	11
SRR488186	6931097	101	Illumina HiSeq 2000	Aeromonas hydrophila SSU	57540	14
SRR401863	1683683	100	Illumina HiSeq 2000	Helicobacter pylori Hp A-11	62670	1
SRR399025	6412133	105	Illumina HiSeq 2000	Fusobacterium ulcerans 12-1B	55476	3
SRR398943	6975813	105	Illumina HiSeq 2000	Veillonella ratti ACS-216-V-Col6b	62429	1
SRR398942	7119647	105	Illumina HiSeq 2000	Actinobaculum massiliae ACS-171-V-Col2	62417	1
SRR398941	5134297	105	Illumina HiSeq 2000	Streptococcus urinalis FB127-CNA-2	50015	2
SRR398938	6971901	105	Illumina HiSeq 2000	Clostridium butyricum 60E.3	56361	9
SRR398927	6997135	105	Illumina HiSeq 2000	Clostridium colicanis 209318	62697	1
SRR398926	7344869	105	Illumina HiSeq 2000	Atopobium minutum 10063974	50290	2
SRR397865	8277793	105	Illumina HiSeq 2000	Massilia timonae CCUG 45783	62428	1
SRR397863	6776953	105	Illumina HiSeq 2000	Facklamia ignava CCUG 37419	62425	1
SRR397862	6552944	105	Illumina HiSeq 2000	Facklamia hominis CCUG 36813	57334	2
SRR397861	7717941	105	Illumina HiSeq 2000	Bergeyella zoohelcum CCUG 30536	57177	2
SRR397859	7080094	105	Illumina HiSeq 2000	Turicella otitidis ATCC 51513	62431	1
SRR397858	7544060	105	Illumina HiSeq 2000	Sphingobium yanoikuyae ATCC 51230	58162	3
SRR392505	8995980	105	Illumina HiSeq 2000	Bacillus cereus HuA3-9	57982	32
SRR391678	6121176	105	Illumina HiSeq 2000	Clostridiales bacterium OBRC5-5	57827	2
SRR357385	7451766	105	Illumina HiSeq 2000	Eggerthia catenaformis OT 569 = DSM 20559	62698	1
SRR357380	6572904	105	Illumina HiSeq 2000	Prevotella maculosa OT 289	57398	3
SRR357378	6476700	105	Illumina HiSeq 2000	Scardovia wiggsiae F0424	62335	1
SRR357376	8172377	105	Illumina HiSeq 2000	Bacteroides finegoldii CL09T03C10	57739	2
SRR357363	4729387	105	Illumina HiSeq 2000	Stomatobaculum longum	62318	1
SRR350201	8240884	105	Illumina HiSeq 2000	Afipia felis ATCC 53690	62421	1
SRR350200	6763231	105	Illumina HiSeq 2000	Alloiococcus otitis ATCC 51267	62422	1
SRR350199	6898319	105	Illumina HiSeq 2000	Afipia broomeae ATCC 49717	57107	4
SRR330061	8283690	105	Illumina HiSeq 2000	Megamonas funiformis YIT 11815	57114	3
SRR326172	5777846	105	Illumina HiSeq 2000	Ralstonia sp. 5_2_56FAA	57911	3
SRR305461	4402178	105	Illumina HiSeq 2000	Parabacteroides distasonis CL03T12C09	56985	15
SRR305302	4406666	105	Illumina HiSeq 2000	Bacteroides nordii CL02T12C05	55557	3
SRR305300	5181216	105	Illumina HiSeq 2000	Bacteroides dorei CL02T12C06	57955	16
SRR305299	3659371	105	Illumina HiSeq 2000	Bacteroides ovatus CL02T12C04	58035	11
SRR305298	5221478	105	Illumina HiSeq 2000	Bacteroides salyersiae CL02T12C01	54873	2
SRR305232	4264213	105	Illumina HiSeq 2000	Parabacteroides johnsonii CL02T12C29	55217	2
SRR305207	4038079	105	Illumina HiSeq 2000	Bacteroides cellulosilyticus CL02T12C19	58046	5
SRR292326	9881372	105	Illumina HiSeq 2000	Helcococcus kunzii ATCC 51366	62427	1
SRR285207	6259710	105	Illumina HiSeq 2000	Parabacteroides merdae CL03T12C32	56972	3
SRR1151296	4130382	101	Illumina HiSeq 2000	Bifidobacterium bifidum ATCC 29521 = JCM 1255	55065	7
SRR1151295	3390434	101	Illumina HiSeq 2000	Bifidobacterium pseudocatenulatum DSM 20438 = JCM 1200	57754	3
SRR1151293	4866253	101	Illumina HiSeq 2000	Bifidobacterium choerinum DSM 20434	46095	2
SRR1151282	3115655	101	Illumina HiSeq 2000	Bifidobacterium angulatum DSM 20098 = JCM 7096	45832	2
SRR1151280	3996486	101	Illumina HiSeq 2000	Bifidobacterium gallicum DSM 20093	34096	2
SRR1151273	2244286	101	Illumina HiSeq 2000	Bifidobacterium catenulatum DSM 16992 = JCM 1194	58257	4
SRR1151272	4228433	101	Illumina HiSeq 2000	Bifidobacterium thermacidophilum subsp. thermacidophilum DSM 15837	58040	7
SRR1151257	4335661	101	Illumina HiSeq 2000	Lactobacillus amylolyticus DSM 11664	61883	1
SRR1151239	5256745	101	Illumina HiSeq 2000	Lactobacillus vini DSM 20605	54110	2
SRR1151229	3928661	101	Illumina HiSeq 2000	Lactobacillus pobuzihii E100301	59744	1
SRR1151209	5339038	101	Illumina HiSeq 2000	Lactobacillus harbinensis DSM 16991	58901	1
SRR1151190	3132351	101	Illumina HiSeq 2000	Lactobacillus fructivorans KCTC 3543	57394	2
SRR1151185	3153638	101	Illumina HiSeq 2000	Lactobacillus farciminis KCTC 3681	62578	1
SRR1151170	5797887	101	Illumina HiSeq 2000	Lactobacillus reuteri DSM 20016	57957	8
SRR1151159	5242563	101	Illumina HiSeq 2000	Lactobacillus iners DSM 13335	56384	16
SRR1151147	4905359	101	Illumina HiSeq 2000	Lactobacillus animalis KCTC 3501	53719	2
SRR1151139	4088468	101	Illumina HiSeq 2000	Lactobacillus johnsonii ATCC 33200	57663	5
SRR1151127	2850795	101	Illumina HiSeq 2000	Lactobacillus delbrueckii subsp. lactis DSM 20072	56845	11
SRR1011933	1745597	101	Illumina HiSeq 2000	Staphylococcus aureus M0480	57055	5
SRR1002780	3193983	101	Illumina HiSeq 2000	Enterococcus faecalis B375	56297	353
SRR1000420	5728482	101	Illumina HiSeq 2000	Mogibacterium timidum ATCC 33093	52974	2
SRR089452	3380301	100	Illumina HiSeq 2000	Selenomonas artemidis F0399	57866	4
ERR351169	4353387	100	Illumina HiSeq 2000	Francisella tularensis subsp. holarctica	57093	49
ERR125215	2893650	100	Illumina HiSeq 2000	Legionella pneumophila subsp. pascullei	62513	1
DRR015826	7060292	100	Illumina HiSeq 2000	Enterococcus hirae ATCC 9790	55131	4

## Sheet: Table S9
Supplemental table S9. Composition of 20 mock communities composed of real Illumina reads from SRA run accessions
sim_id	run_accession	relative_abundance
1	SRR965115	0.5
2	SRR397859	0.25
3	SRR965281	0.125
4	SRR611384	0.0625001
5	SRR630109	0.03125
6	SRR654220	0.015625
7	SRR769329	0.00781251
8	SRR507728	0.00390625
9	SRR330061	0.00195313
10	SRR769334	0.000976563
11	SRR769345	0.000488282
12	SRR357380	0.000244141
13	SRR631189	0.00012207
14	SRR835778	6.10352e-05
15	SRR1151295	3.05176e-05
16	SRR715770	1.52588e-05
17	SRR643123	7.6294e-06
18	SRR606276	3.8147e-06
19	SRR965257	1.90735e-06
20	SRR305232	9.53675e-07
1	SRR768698	0.5
2	SRR951581	0.25
3	SRR776452	0.125
4	SRR1151190	0.0625001
5	SRR530264	0.03125
6	SRR850735	0.015625
7	SRR540266	0.00781251
8	SRR807365	0.00390625
9	SRR543717	0.00195313
10	SRR629772	0.000976563
11	DRR015826	0.000488282
12	SRR647438	0.000244141
13	SRR397859	0.00012207
14	SRR519764	6.10352e-05
15	SRR728916	3.05176e-05
16	SRR768686	1.52588e-05
17	SRR399025	7.6294e-06
18	SRR728920	3.8147e-06
19	SRR357378	1.90735e-06
20	SRR965298	9.53675e-07
1	SRR965281	0.5
2	SRR519768	0.25
3	SRR488186	0.125
4	SRR736005	0.0625001
5	SRR513625	0.03125
6	SRR715770	0.015625
7	SRR292326	0.00781251
8	SRR769345	0.00390625
9	SRR768688	0.00195313
10	SRR647433	0.000976563
11	SRR965012	0.000488282
12	SRR543717	0.000244141
13	SRR398927	0.00012207
14	SRR654370	6.10352e-05
15	SRR643123	3.05176e-05
16	SRR398926	1.52588e-05
17	SRR768719	7.6294e-06
18	SRR948558	3.8147e-06
19	SRR654421	1.90735e-06
20	SRR768686	9.53675e-07
1	SRR769329	0.5
2	SRR330061	0.25
3	SRR769345	0.125
4	SRR519766	0.0625001
5	SRR630109	0.03125
6	SRR768717	0.015625
7	SRR654323	0.00781251
8	SRR1151147	0.00390625
9	SRR398943	0.00195313
10	SRR1151239	0.000976563
11	SRR1002780	0.000488282
12	SRR769334	0.000244141
13	SRR965190	0.00012207
14	SRR540264	6.10352e-05
15	SRR654411	3.05176e-05
16	SRR768700	1.52588e-05
17	SRR848075	7.6294e-06
18	SRR654288	3.8147e-06
19	SRR721207	1.90735e-06
20	SRR999551	9.53675e-07
1	SRR647433	0.5
2	SRR647110	0.25
3	SRR1151190	0.125
4	SRR633646	0.0625001
5	SRR357380	0.03125
6	SRR965115	0.015625
7	SRR642158	0.00781251
8	SRR519772	0.00390625
9	SRR350200	0.00195313
10	SRR948558	0.000976563
11	SRR768707	0.000488282
12	SRR629772	0.000244141
13	SRR1151209	0.00012207
14	SRR951581	6.10352e-05
15	SRR654241	3.05176e-05
16	SRR728916	1.52588e-05
17	SRR965190	7.6294e-06
18	SRR654421	3.8147e-06
19	SRR519770	1.90735e-06
20	SRR721207	9.53675e-07
1	SRR392505	0.5
2	SRR654323	0.25
3	SRR507728	0.125
4	SRR292326	0.0625001
5	SRR397865	0.03125
6	SRR965199	0.015625
7	SRR728920	0.00781251
8	SRR770060	0.00390625
9	SRR642982	0.00195313
10	SRR728916	0.000976563
11	SRR728965	0.000488282
12	SRR965298	0.000244141
13	SRR800410	0.00012207
14	SRR350201	6.10352e-05
15	SRR1002780	3.05176e-05
16	SRR835813	1.52588e-05
17	SRR647110	7.6294e-06
18	SRR654288	3.8147e-06
19	SRR398926	1.90735e-06
20	SRR1011933	9.53675e-07
1	SRR1000420	0.5
2	SRR835807	0.25
3	SRR1151127	0.125
4	SRR770060	0.0625001
5	SRR769342	0.03125
6	SRR965281	0.015625
7	SRR642158	0.00781251
8	SRR543717	0.00390625
9	SRR543716	0.00195313
10	SRR519764	0.000976563
11	SRR350199	0.000488282
12	SRR654233	0.000244141
13	SRR728965	0.00012207
14	SRR850735	6.10352e-05
15	SRR951581	3.05176e-05
16	SRR1151229	1.52588e-05
17	SRR285207	7.6294e-06
18	SRR1151139	3.8147e-06
19	SRR850718	1.90735e-06
20	SRR507752	9.53675e-07
1	SRR748523	0.5
2	SRR768694	0.25
3	SRR715769	0.125
4	SRR647110	0.0625001
5	SRR654411	0.03125
6	SRR305299	0.015625
7	SRR728965	0.00781251
8	SRR519772	0.00390625
9	SRR741909	0.00195313
10	SRR540266	0.000976563
11	SRR999477	0.000488282
12	SRR728916	0.000244141
13	SRR769334	0.00012207
14	SRR397865	6.10352e-05
15	SRR965190	3.05176e-05
16	SRR654273	1.52588e-05
17	SRR728910	7.6294e-06
18	SRR1011933	3.8147e-06
19	SRR397858	1.90735e-06
20	SRR736005	9.53675e-07
1	SRR654227	0.5
2	SRR770060	0.25
3	SRR728970	0.125
4	SRR357376	0.0625001
5	SRR654323	0.03125
6	SRR397859	0.015625
7	SRR642982	0.00781251
8	SRR768686	0.00390625
9	SRR1151273	0.00195313
10	SRR1151147	0.000976563
11	SRR305207	0.000488282
12	SRR630109	0.000244141
13	SRR999477	0.00012207
14	SRR1151159	6.10352e-05
15	SRR715769	3.05176e-05
16	SRR721210	1.52588e-05
17	SRR647434	7.6294e-06
18	SRR768690	3.8147e-06
19	ERR125215	1.90735e-06
20	SRR1151295	9.53675e-07
1	SRR951581	0.5
2	SRR642982	0.25
3	SRR397859	0.125
4	SRR642969	0.0625001
5	SRR965184	0.03125
6	SRR654241	0.015625
7	SRR1151273	0.00781251
8	SRR642887	0.00390625
9	SRR397861	0.00195313
10	SRR721210	0.000976563
11	SRR350199	0.000488282
12	SRR611258	0.000244141
13	SRR643123	0.00012207
14	SRR1151170	6.10352e-05
15	SRR1151272	3.05176e-05
16	SRR611261	1.52588e-05
17	SRR807365	7.6294e-06
18	SRR397863	3.8147e-06
19	SRR728920	1.90735e-06
20	SRR741914	9.53675e-07
1	SRR543716	0.5
2	SRR835813	0.25
3	SRR965245	0.125
4	SRR1151190	0.0625001
5	SRR398927	0.03125
6	SRR305300	0.015625
7	SRR611258	0.00781251
8	SRR1151139	0.00390625
9	SRR965016	0.00195313
10	SRR397865	0.000976563
11	SRR654263	0.000488282
12	SRR1151159	0.000244141
13	SRR628699	0.00012207
14	SRR728916	6.10352e-05
15	SRR728964	3.05176e-05
16	SRR654227	1.52588e-05
17	SRR507728	7.6294e-06
18	SRR642969	3.8147e-06
19	SRR965115	1.90735e-06
20	SRR729310	9.53675e-07
1	SRR654200	0.5
2	SRR728916	0.25
3	SRR965031	0.125
4	SRR965245	0.0625001
5	SRR631783	0.03125
6	SRR397859	0.015625
7	SRR305300	0.00781251
8	SRR729310	0.00390625
9	SRR305302	0.00195313
10	SRR1151159	0.000976563
11	SRR965231	0.000488282
12	SRR628699	0.000244141
13	SRR543717	0.00012207
14	SRR770060	6.10352e-05
15	SRR965281	3.05176e-05
16	SRR835941	1.52588e-05
17	SRR530264	7.6294e-06
18	SRR807365	3.8147e-06
19	SRR305298	1.90735e-06
20	SRR721174	9.53675e-07
1	SRR965231	0.5
2	SRR962290	0.25
3	SRR398926	0.125
4	SRR357378	0.0625001
5	SRR1151190	0.03125
6	SRR721207	0.015625
7	SRR965281	0.00781251
8	SRR1151209	0.00390625
9	SRR1151272	0.00195313
10	SRR530264	0.000976563
11	SRR768707	0.000488282
12	SRR305299	0.000244141
13	SRR654343	0.00012207
14	SRR326172	6.10352e-05
15	SRR654425	3.05176e-05
16	SRR728916	1.52588e-05
17	SRR654370	7.6294e-06
18	SRR631783	3.8147e-06
19	SRR399025	1.90735e-06
20	SRR647110	9.53675e-07
1	SRR965245	0.5
2	SRR1151229	0.25
3	SRR519770	0.125
4	SRR631189	0.0625001
5	SRR965184	0.03125
6	SRR305300	0.015625
7	SRR741909	0.00781251
8	SRR654411	0.00390625
9	ERR125215	0.00195313
10	SRR519772	0.000976563
11	SRR397859	0.000488282
12	SRR768717	0.000244141
13	SRR519766	0.00012207
14	SRR647110	6.10352e-05
15	SRR768686	3.05176e-05
16	ERR351169	1.52588e-05
17	SRR1151296	7.6294e-06
18	SRR611384	3.8147e-06
19	SRR999477	1.90735e-06
20	SRR654343	9.53675e-07
1	SRR631098	0.5
2	SRR654421	0.25
3	SRR305207	0.125
4	SRR965190	0.0625001
5	SRR398941	0.03125
6	SRR540259	0.015625
7	SRR611258	0.00781251
8	SRR642982	0.00390625
9	SRR800412	0.00195313
10	SRR647433	0.000976563
11	SRR611384	0.000488282
12	SRR654233	0.000244141
13	SRR397865	0.00012207
14	SRR1151296	6.10352e-05
15	SRR530264	3.05176e-05
16	SRR647434	1.52588e-05
17	SRR629772	7.6294e-06
18	SRR965184	3.8147e-06
19	SRR519763	1.90735e-06
20	SRR835794	9.53675e-07
1	SRR611261	0.5
2	SRR628699	0.25
3	SRR357380	0.125
4	SRR835809	0.0625001
5	SRR768698	0.03125
6	SRR850718	0.015625
7	SRR728910	0.00781251
8	SRR1151139	0.00390625
9	SRR1151170	0.00195313
10	SRR835778	0.000976563
11	SRR398942	0.000488282
12	SRR654342	0.000244141
13	SRR397863	0.00012207
14	SRR398943	6.10352e-05
15	SRR769338	3.05176e-05
16	SRR768688	1.52588e-05
17	SRR540259	7.6294e-06
18	SRR357376	3.8147e-06
19	SRR1151296	1.90735e-06
20	SRR631189	9.53675e-07
1	SRR728965	0.5
2	SRR515552	0.25
3	SRR530264	0.125
4	SRR654220	0.0625001
5	SRR965257	0.03125
6	SRR392505	0.015625
7	SRR736005	0.00781251
8	SRR540261	0.00390625
9	SRR768700	0.00195313
10	SRR326172	0.000976563
11	SRR606276	0.000488282
12	SRR631098	0.000244141
13	SRR642982	0.00012207
14	SRR835809	6.10352e-05
15	SRR1151147	3.05176e-05
16	SRR397861	1.52588e-05
17	SRR527319	7.6294e-06
18	SRR721210	3.8147e-06
19	SRR628699	1.90735e-06
20	SRR654263	9.53675e-07
1	SRR292326	0.5
2	SRR1151159	0.25
3	SRR807365	0.125
4	SRR729310	0.0625001
5	SRR999477	0.03125
6	SRR965231	0.015625
7	SRR728970	0.00781251
8	SRR647434	0.00390625
9	SRR611384	0.00195313
10	SRR768698	0.000976563
11	SRR768700	0.000488282
12	SRR999551	0.000244141
13	SRR401863	0.00012207
14	SRR647110	6.10352e-05
15	SRR654425	3.05176e-05
16	SRR948558	1.52588e-05
17	SRR965298	7.6294e-06
18	SRR769338	3.8147e-06
19	SRR728965	1.90735e-06
20	SRR350199	9.53675e-07
1	SRR654220	0.5
2	SRR965115	0.25
3	SRR835807	0.125
4	SRR519768	0.0625001
5	SRR285207	0.03125
6	SRR326172	0.015625
7	SRR1151190	0.00781251
8	SRR654288	0.00390625
9	SRR1151185	0.00195313
10	SRR540264	0.000976563
11	SRR507728	0.000488282
12	SRR715770	0.000244141
13	SRR1151127	0.00012207
14	SRR654323	6.10352e-05
15	SRR770060	3.05176e-05
16	SRR729310	1.52588e-05
17	SRR350200	7.6294e-06
18	SRR1151229	3.8147e-06
19	SRR768686	1.90735e-06
20	SRR633646	9.53675e-07
1	SRR654288	0.5
2	SRR654263	0.25
3	SRR965184	0.125
4	SRR948558	0.0625001
5	SRR848075	0.03125
6	SRR965298	0.015625
7	SRR768702	0.00781251
8	SRR326172	0.00390625
9	SRR949939	0.00195313
10	SRR770043	0.000976563
11	SRR611384	0.000488282
12	SRR768707	0.000244141
13	SRR769329	0.00012207
14	SRR540264	6.10352e-05
15	SRR540259	3.05176e-05
16	SRR391678	1.52588e-05
17	SRR507728	7.6294e-06
18	SRR398941	3.8147e-06
19	SRR721207	1.90735e-06
20	SRR330061	9.53675e-07

## Sheet: Table S10
Supplemental table S10. Summary of marker alleles, and their validation, for 66 prevalent human gut species species_name: consensus Latin name for species species_id: internal species identifier assigned by MIDAS count_samples: number of samples where the species was found with >10x sequencing coverage. Includes samples from the HMP and the Mother-Infant dataset. These samples were used to id mar…
species_name	species_id	count_samples	count_markers	markers_per_sample	count_positives	positive_sharing	sensitivity	count_negatives	negative_sharing	specificity
Bacteroides vulgatus	57955	212	28054	132	526	0.751838	1	889	0.0036378	0.982
Bacteroides uniformis	57318	187	7810	42	348	0.778226	1	631	0.00545723	0.9794
Alistipes putredinis	61533	150	9771	65	268	0.858471	1	423	0.00432246	0.9764
Bacteroides ovatus	58035	140	4653	33	240	0.742027	0.975	403	0.0074294	0.9826
Parabacteroides distasonis	56985	126	18967	151	196	0.825365	1	193	0.00248912	0.9948
Eubacterium rectale	56927	122	31162	255	132	0.837617	1	210	0.01105	0.9667
Bacteroides caccae	53434	106	16212	153	98	0.709773	1	192	0.00180625	0.9948
Parabacteroides merdae	56972	101	25876	256	172	0.616363	1	264	0.0153723	0.9545
Blautia wexlerae	56130	98	27676	282	8	0.47325	1	3	0.0125333	1
Alistipes onderdonkii	55464	97	8551	88	70	0.681163	1	125	0.007304	0.968
Faecalibacterium prausnitzii	62201	96	5559	58	14	0.657586	1	46	0.00680217	1
Ruminococcus bromii	62047	96	16945	177	82	0.911917	1	135	0.00671556	0.9852
Bacteroides thetaiotaomicron	56941	94	13418	143	200	0.791385	0.99	269	0.0182245	0.9591
Bacteroides fragilis	54507	92	8389	91	146	0.917563	1	92	0.00227609	1
Bifidobacterium longum	57796	89	12700	143	2	0.6973	1	0	n/a	n/a
Escherichia coli	58110	86	15328	178	4	0.9795	1	2	0.0034	1
Bacteroides stercoris	56735	84	23104	275	120	0.807242	1	211	0.00662133	0.9716
Barnesiella intestinihominis	62208	82	12783	156	88	0.859405	1	89	0.0449596	0.9213
Bacteroides xylanisolvens	57185	80	625	8	208	0.745755	0.9519	169	0.0102222	0.9349
Alistipes shahii	62199	76	10134	133	78	0.664136	1	146	0.0055637	0.9932
butyrate-producing bacterium	55206	72	18522	257	0	n/a	n/a	1	0.0181	1
Eubacterium eligens	61678	68	12665	186	12	0.80905	1	39	0.0185974	0.9744
Ruminococcus gnavus	57638	68	13561	199	4	0.81725	1	3	0.0458	0.6667
Faecalibacterium cf.	62236	67	7811	117	20	0.61027	1	35	0.0191286	0.8857
Ruminococcus bicirculans	59300	61	30880	506	62	0.942319	1	62	0.014021	0.9194
Bacteroides cellulosilyticus	58046	60	44772	746	106	0.928632	1	63	0.00937143	0.9524
Bifidobacterium adolescentis	56815	59	12931	219	2	0.8063	1	0	n/a	n/a
Faecalibacterium prausnitzii	61481	58	12379	213	28	0.854029	1	23	0.0307478	0.913
Odoribacter splanchnicus	62174	58	6270	108	58	0.894041	1	91	0.0292648	0.8571
Dialister invisus	61905	55	17757	323	62	0.930087	1	31	0.00847742	1
Bacteroides massiliensis	44749	54	6358	118	80	0.796817	1	63	0.0201429	0.9206
Alistipes finegoldii	56071	54	5436	101	44	0.833073	1	60	0.00875	0.9333
Roseburia inulinivorans	61943	51	4055	80	66	0.876545	1	32	0.0308875	0.9688
Faecalibacterium prausnitzii	57453	51	8763	172	90	0.618224	1	54	0.015937	0.9444
Phascolarctobacterium sp.	59817	45	11714	260	24	0.918792	1	39	0.0701385	0.8718
Roseburia intestinalis	56239	41	5761	141	64	0.799466	1	18	0.0276333	0.7778
Oscillibacter sp.	60799	40	6381	160	44	0.75815	1	56	0.0313375	0.9286
Bifidobacterium bifidum	55065	40	10561	264	0	n/a	n/a	0	n/a	n/a
Bifidobacterium breve	57133	38	5994	158	0	n/a	n/a	0	n/a	n/a
Prevotella copri	61740	37	55160	1491	48	0.868596	1	33	0.0166758	0.9394
Bacteroides faecis	58503	37	17403	470	34	0.752665	1	17	0.0108412	0.8824
Bacteroidales bacterium	58650	36	1860	52	18	0.895011	1	23	0.0412261	0.7391
Ruminococcus sp.	55468	36	15935	443	0	n/a	n/a	0	n/a	n/a
Akkermansia muciniphila	55290	35	11675	334	16	0.729237	1	17	0.0638412	0.8824
Sutterella wadsworthensis	56828	35	10909	312	26	0.8884	1	14	0.00482143	1
Eubacterium siraeum	57634	32	20367	636	12	0.85475	1	11	0.00782727	1
Enterococcus faecalis	56297	29	10881	375	0	n/a	n/a	0	n/a	n/a
Bacteroides eggerthii	54457	29	11758	405	22	0.796727	1	2	0.2006	0.5
Lachnospiraceae bacterium	51870	29	2970	102	14	0.635971	1	12	0.00990833	1
Bacteroides finegoldii	57739	26	7478	288	32	0.7358	1	19	0.0191526	0.9474
Ruminococcus torques	62045	26	3698	142	2	0.8257	1	0	n/a	n/a
Bifidobacterium pseudocatenulatum	57754	25	8295	332	0	n/a	n/a	0	n/a	n/a
Eubacterium hallii	61477	25	6984	279	0	n/a	n/a	0	n/a	n/a
Erysipelotrichaceae bacterium	56596	23	12256	533	0	n/a	n/a	0	n/a	n/a
Clostridium nexile	61654	21	4923	234	2	0.9832	1	1	0.0039	1
Bacteroides intestinalis	61596	21	21012	1001	8	0.803525	1	7	0.118186	0.7143
Clostridiales bacterium	56470	20	4585	229	0	n/a	n/a	0	n/a	n/a
Paraprevotella clara	33712	20	1074	54	18	0.925967	1	7	0.00665714	1
Bacteroides plebeius	61623	20	17806	890	18	0.976433	1	11	0.0435818	0.6364
Clostridiales bacterium	52743	19	6963	366	0	n/a	n/a	0	n/a	n/a
Bifidobacterium catenulatum	58257	18	7883	438	0	n/a	n/a	0	n/a	n/a
Coprococcus sp.	62244	18	9982	555	10	0.9683	1	0	n/a	n/a
Burkholderiales bacterium	56577	18	2172	121	6	0.8998	1	2	0.01145	1
Clostridium sp.	61482	17	13093	770	12	0.977833	1	1	0.0153	1
Subdoligranulum sp.	62068	15	3339	223	8	0.7246	1	4	0.01405	1
Butyrivibrio crossotus	61674	10	11006	1101	106	0.94707	1	2	0.11875	0

[truncated: 4 more sheets: Table S11, Table S12, Table S13, Table S14]
